# Supplementary material for: Social determinants and changes in energy drink consumption among adolescents in Norway, 2017–2019: a cross-sectional study
Source: PubMed Central journal article supplement — BMJ Open. 2021 Aug 20;11(8):e049284. doi: 10.1136/bmjopen-2021-049284 (PMC8381306; doi:10.1136/bmjopen-2021-049284), 2021-08-20
Supplement: bmjopen-2021-049284.draft_revisions.pdf [file bmjopen-2021-049284.draft_revisions.pdf]

# BMJ Open

BMJ Open is committed to open peer review. As part of this commitment we make the peer review history of every article we publish publicly available.

When an article is published we post the peer reviewers' comments and the authors' responses online. We also post the versions of the paper that were used during peer review. These are the versions that the peer review comments apply to.

The versions of the paper that follow are the versions that were submitted during the peer review process. They are not the versions of record or the final published versions. They should not be cited or distributed as the published version of this manuscript.

BMJ Open is an open access journal and the full, final, typeset and author-corrected version of record of the manuscript is available on our site with no access controls, subscription charges or pay-per-view fees (<http://bmjopen.bmj.com>).

If you have any questions on BMJ Open's open peer review process please email [info.bmjopen@bmj.com](mailto:info.bmjopen@bmj.com)

# BMJ Open

## Recent Time Trends in Energy Drinks Consumption Among Adolescents in Norway.

|                               |                                                                                                                                                                                                                                                                                                                                                                                                                                                                                                                                                                                                                                                                 |
|-------------------------------|-----------------------------------------------------------------------------------------------------------------------------------------------------------------------------------------------------------------------------------------------------------------------------------------------------------------------------------------------------------------------------------------------------------------------------------------------------------------------------------------------------------------------------------------------------------------------------------------------------------------------------------------------------------------|
| Journal:                      | <i>BMJ Open</i>                                                                                                                                                                                                                                                                                                                                                                                                                                                                                                                                                                                                                                                 |
| Manuscript ID                 | bmjopen-2021-049284                                                                                                                                                                                                                                                                                                                                                                                                                                                                                                                                                                                                                                             |
| Article Type:                 | Original research                                                                                                                                                                                                                                                                                                                                                                                                                                                                                                                                                                                                                                               |
| Date Submitted by the Author: | 20-Jan-2021                                                                                                                                                                                                                                                                                                                                                                                                                                                                                                                                                                                                                                                     |
| Complete List of Authors:     | Kaldenbach, Siri; Sykehuset Innlandet HF, Department of Paediatric and Adolescent Medicine, Innlandet Hospital Trust; University of Oslo Faculty of Medicine, Clinical Medicine<br>Strand, Tor A.; Sykehuset Innlandet HF, Research Department, Innlandet Hospital Trust; University of Bergen Centre for International Health<br>Solvik, Beate; Sykehuset Innlandet HF, Women's Clinic, Innlandet Hospital Trust; University of Bergen Centre for International Health<br>Holten-Andersen, Mads; Sykehuset Innlandet HF, Department of Paediatric and Adolescent Medicine, Innlandet Hospital Trust; University of Oslo Faculty of Medicine, Clinical Medicine |
| Keywords:                     | Public health < INFECTIOUS DISEASES, NUTRITION & DIETETICS, Community child health < PAEDIATRICS                                                                                                                                                                                                                                                                                                                                                                                                                                                                                                                                                                |
|                               |                                                                                                                                                                                                                                                                                                                                                                                                                                                                                                                                                                                                                                                                 |

SCHOLARONE™  
Manuscripts

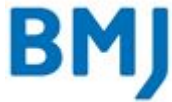

I, the Submitting Author has the right to grant and does grant on behalf of all authors of the Work (as defined in the below author licence), an exclusive licence and/or a non-exclusive licence for contributions from authors who are: i) UK Crown employees; ii) where BMJ has agreed a CC-BY licence shall apply, and/or iii) in accordance with the terms applicable for US Federal Government officers or employees acting as part of their official duties; on a worldwide, perpetual, irrevocable, royalty-free basis to BMJ Publishing Group Ltd ("BMJ") its licensees and where the relevant Journal is co-owned by BMJ to the co-owners of the Journal, to publish the Work in this journal and any other BMJ products and to exploit all rights, as set out in our [licence](#).

The Submitting Author accepts and understands that any supply made under these terms is made by BMJ to the Submitting Author unless you are acting as an employee on behalf of your employer or a postgraduate student of an affiliated institution which is paying any applicable article publishing charge ("APC") for Open Access articles. Where the Submitting Author wishes to make the Work available on an Open Access basis (and intends to pay the relevant APC), the terms of reuse of such Open Access shall be governed by a Creative Commons licence – details of these licences and which [Creative Commons](#) licence will apply to this Work are set out in our licence referred to above.

Other than as permitted in any relevant BMJ Author's Self Archiving Policies, I confirm this Work has not been accepted for publication elsewhere, is not being considered for publication elsewhere and does not duplicate material already published. I confirm all authors consent to publication of this Work and authorise the granting of this licence.

1  
2  
3 **Title page**  
4  
5

6 **Title: Recent Time Trends in Energy Drinks Consumption Among Adolescents in Norway.**  
7  
8

9 **Author's information**  
10

11 **Corresponding author**  
12

13 Siri Kaldenbach  
14

15 Adres: Anders Sandvigsgate 17, 2609 Lillehammer, Norway.  
16

17 Email: [siri.kaldenbach@sykehuset-innlandet.no](mailto:siri.kaldenbach@sykehuset-innlandet.no)  
18

19 Telephone: +4741086031  
20

21 **Departments**  
22

- 23 1. Sykehuset Innlandet HF, Department of Paediatric and Adolescent Medicine,  
24 Innlandet Hospital Trust  
25 Lillehammer, NO  
26
- 27 2. University of Oslo, Clinical Medicine  
28 Oslo, NO  
29 +4741086031  
30  
31

32 **Co-authors**  
33

34 Tor A. Strand  
35

- 36 1. Sykehuset Innlandet HF, Research Department, Innlandet Hospital Trust  
37 Lillehammer, NO  
38 +4790971086  
39
- 40 2. University of Bergen, Center for International Health  
41 Bergen, Hordaland, NO  
42 +4790971086  
43  
44

45 Beate Stokke Solvik  
46

- 47 1. Sykehuset Innlandet HF, Women's Clinic, Innlandet Hospital Trust  
48 Lillehammer, NO  
49 +4793292801  
50
- 51 2. University of Bergen, Center for International Health  
52 Bergen, Hordaland, NO  
53 +4793292801  
54

55 Mads Holten-Andersen  
56

- 57 1. Sykehuset Innlandet HF, Department of Paediatric and Adolescent Medicine,  
58 Innlandet Hospital Trust  
59  
60

Lillehammer, NO  
+4741487829

2. University of Oslo, Clinical Medicine  
Oslo, NO  
+4741487829

**Keywords:** Lifestyle, Child Health, Gender, Public Health

**Word count:** 3308

For peer review only

## Recent Time Trends in Energy Drinks Consumption Among Adolescents in Norway.

**Background:** In Norway, sales of energy drinks (EDs) increased with >50% from 2017 to 2019. EDs are caffeinated beverages marketed as performance boosters and have been linked to various potential adverse effects. This study describes the extent and trends in ED consumption among Norwegian adolescents in 2017, 2018 and 2019.

**Methods:** National data from annual youth surveys with 278,891 respondents in lower and upper secondary school was analyzed identifying time trends and determinants for ED consumption.

**Results:** Over the three-year period, 88,373 (66.4%) of the males and 57,816 (41.8%) of the females had consumed ED once a week or more. Of the ED consumers, 10.8% of the males and 4.2% of the females were high consumers. The proportion of female high consumers increased from 3.3% to 4.9% from 2017-2019; for males, the increase was from 9.8% to 11.5%. This corresponds to 23% and 6% average annual increase among girls and boys, respectively. Any consumption as well as high ED consumption were independently associated with school level, rural residency, low socioeconomic status, physical inactivity and high leisure screen time.

**Conclusion:** We observed an increase in high consumers among both boys and girls from 2017-2019. ED consumption adds to an already unhealthy behavior in certain adolescents.

1  
2  
3 Article summary  
4  
5

6 Strengths and limitations of this study:  
7  
8

- 9
- 10 • This study demonstrates recent time trends in the frequency at which energy drinks  
11 are consumed among adolescents in Norway.  
12
  - 13 • Data are derived from a large, annual, national survey in Norway with close to  
14 300,000 adolescents participating in the study.  
15
  - 16 • The study relies on self-reported energy drink consumption which can be susceptible  
17 to both recall bias and social desirability bias.  
18  
19  
20  
21  
22  
23  
24  
25  
26  
27  
28  
29  
30  
31  
32  
33  
34  
35  
36  
37  
38  
39  
40  
41  
42  
43  
44  
45  
46  
47  
48  
49  
50  
51  
52  
53  
54  
55  
56  
57  
58  
59  
60

1  
2  
3 Being marketed as a booster of mental and physical capacity, energy drinks (EDs) have  
4  
5 gained worldwide popularity. In Norway, ED sales increased by more than 50% from 2017 to  
6  
7 2019 (1). EDs are defined as non-alcoholic beverages that contain at least 150 mg caffeine  
8  
9 per liter, in addition to sugar combined with one or more substances known to have  
10  
11 stimulant properties (2-4). Moreover, vitamins, minerals, and amino acids are often added to  
12  
13 EDs (4). ED marketing is often targeted toward sports and the adolescent population.  
14  
15  
16 Moreover, increased odds of ED consumption have been found among viewers of channels  
17  
18 targeted by ED advertisers (5-7). Zucconi et.al found that 41% of European adolescents  
19  
20 consumed EDs for physical activity purposes (2).  
21  
22  
23

24  
25 ED consumption among children and adolescents has been linked to potential negative  
26  
27 effects such as increased sleep disturbance resulting in tiredness, inattention, reduced  
28  
29 school performance, and increased mental distress (8-10). It is mainly the high caffeine  
30  
31 content in EDs combined with the sugar content and sweet flavor, and high content of  
32  
33 stimulating substances which is giving rise to concern (11). It has been argued that this  
34  
35 combination of ingredients may cause faster uptake of caffeine into the blood compared to  
36  
37 regular coffee (11). Moreover, studies have indicated that adding caffeine to sugar-  
38  
39 sweetened beverages (SSB) leads to increased use of SSBs, which in turn results in increased  
40  
41 energy intakes (12, 13). Increased energy intake may eventually result in overweight and  
42  
43 obesity, next to dental caries due to the high sugar and citric acid content of ED and SSBs  
44  
45  
46  
47  
48  
49  
50 (14).  
51  
52

53 In 2013, the European Food Safety Authority (EFSA) published a report on ED use, indicating  
54  
55 that children and adolescents aged 10-18 years had the highest reported consumption  
56  
57 (68%), compared with adults above 18 years (30%) and children below 10 years (18%) (3).  
58  
59  
60



1  
2  
3 The potential negative short and long-term effects of ED in children and adolescents have  
4 gained attention of government authorities in several countries, of which some have issued  
5 restrictions on the caffeine content in EDs (15). The Norwegian Food Safety Authority (NFSA)  
6 has stated that the daily intake of caffeine for children and adolescents should not exceed  
7 2.5 mg/kg. This was decided based on a review of current knowledge by the Norwegian  
8 Scientific Committee for Food and Environment (VKM) (4).  
9  
10  
11  
12  
13  
14  
15  
16

17  
18 According to the findings of the VKM review, a child or youth would have a risk of sleep  
19 disturbance with an intake of 1.4 mg/kg bodyweight/day of caffeine (4). Furthermore, the  
20 risk of negative health effects affecting the heart and central nervous system would be  
21 present at an intake of 3 mg/kg bodyweight/day of caffeine. This would mean that a 13-15  
22 years old adolescent with an average weight of 50 kg would be at risk of sleep disturbance  
23 when drinking more than 70 mg/day of caffeine and at risk of adverse cardiac and central  
24 neurologic effects at a daily consumption of 150 mg/day. These values are in line with  
25 recommendations by EFSA and correspond to an intake of one to two large cans (500ml) of  
26 ED for an adolescent described above (4).  
27  
28  
29  
30  
31  
32  
33  
34  
35  
36  
37  
38  
39  
40

41 ED consumption varies according to age and gender. Several studies have found that male  
42 adolescents are more likely to consume EDs than their female counterparts. Moreover,  
43 young (male) adolescents have a higher ED consumption rate than older adolescents at high  
44 school level (3, 16, 17). Furthermore, Degirmenci et al. found that high consumption (> 4  
45 times a week) of ED was independently associated with male gender, physical inactivity, high  
46 leisure screen time, low socioeconomic status and rural residency (18).  
47  
48  
49  
50  
51  
52  
53  
54  
55

56 Of special concern for potential adverse effects are children and adolescents who have lower  
57 body weight, and are less adapted to ED stimulants, including caffeine. According to the  
58  
59  
60

1  
2  
3 American Academy of Pediatric; “Caffeine and other stimulants contained in energy drinks  
4  
5 have no place in the diet of children and adolescents”(19). Given the aforementioned  
6  
7 increased sales of ED in Norway, it is still unclear to which extent the consumption of ED  
8  
9 among children and adolescents parallels this development (15). The objective of the current  
10  
11 study is therefore to describe the extent and trends in ED consumption among Norwegian  
12  
13 adolescents in 2017, 2018 and 2019, according to age, gender, socio-economic status (SES),  
14  
15 residency, physical activity, and leisure screen-time.  
16  
17  
18  
19  
20  
21  
22  
23  
24  
25  
26  
27  
28  
29  
30  
31  
32  
33  
34  
35  
36  
37  
38  
39  
40  
41  
42  
43  
44  
45  
46  
47  
48  
49  
50  
51  
52  
53  
54  
55  
56  
57  
58  
59  
60

## METHODS

### Study design and participants

Data for the study was collected through the Ungdata survey, a national representative survey, mapping the health and well-being of lower and upper secondary school students in Norway. The study was predefined according to the Norwegian Centre for Research data. Detailed information regarding the survey can be found on [www.ungdata.no](http://www.ungdata.no) (20). All data collection is conducted anonymously and web-based during school hours with the teacher present in the classroom. Data from the surveys carried out in 2017, 2018 and 2019 were used for the present study. The study was approved by the Norwegian Centre for Research Data.

All municipalities in Norway are invited to participate in the Ungdata survey. Participation is free of charge and on a volunteer basis. The municipalities are encouraged to perform the survey every third year to ensure that all adolescents get to participate once both during lower (8<sup>th</sup> to 10<sup>th</sup> grade) and upper (11<sup>th</sup> to 13<sup>th</sup> grade) secondary school. The three-year interval is not a strict rule, which means that some municipalities participated twice and some all three years (2017-2019). In the present study, information from all municipalities were included regardless of how many years they participated. It is therefore possible that some adolescents responded twice or thrice. In total, we have data from 454 municipalities, 333 participated only once, 59 twice, and one municipality participated all three years.

In Norway, children start school the year they turn six years old (grade 1) and stay in school until the age of 15-16 years (grade 10). Attending school is obligatory by law until the completion of grade 10 whereas attending subsequent grades is voluntary. National

1  
2  
3 statistics show that the majority of 16-18 year olds (93.4% in 2019) go on to attend upper  
4  
5 secondary schools (21).  
6  
7

8  
9 A total of 297,102 adolescents from both lower and upper secondary school participated in  
10  
11 the Ungdata surveys from 2017, 2018 and 2019. Of these, 278,891 answered the questions  
12  
13 on ED consumption (93.9%) and were included the analyses. The overall participation from  
14  
15 the total number of eligible students to those who answered the ED question was 74.4%  
16  
17  
18 over the three-year period. See figure 1 for more details.  
19  
20

21  
22 The annual Ungdata Survey is approved by the Norwegian Centre for Research Data (NSD). It  
23  
24 does not have its own ID as data collection was done anonymous and does not contain  
25  
26 sensitive information. The study was funded by Innlandet Hospital Trust (project number:  
27  
28 150377).  
29  
30

### 31 32 Measures

33  
34  
35 The Ungdata survey is an electronic questionnaire with a fixed section and an elective  
36  
37 section. In 2017, 2018 and 2019, the fixed section consisted of 159 questions for lower  
38  
39 secondary students and 168 questions for the upper secondary students (22). For the  
40  
41 purpose of this article, selected questions from the fixed section were used.  
42  
43  
44

45  
46 The following variables were selected for the analyses in the present study: ED consumption,  
47  
48 grade, gender, year, residency, SES, frequency of physical activity and leisure screen time. All  
49  
50 variables were self-reported.  
51  
52

53  
54 ED consumption was assessed with the question “How often do you usually drink energy  
55  
56 drinks (Red Bull, Battery etc.)?” The participants could respond with one of seven  
57  
58 incremental options, ranging from “never” to “several times a day”. The response to this  
59  
60

1  
2  
3 question was used to categorize adolescents into the following two groups subsequently  
4  
5 used as outcome variables: ED consumers (ED  $\geq$  once a month) and high ED consumers (ED  $\geq$   
6  
7 4 times a week). The ED consumers were compared to non-ED consumers, and the high ED  
8  
9 consumers were compared to the rest (all other frequency of ED consumption including non-  
10  
11 ED).  
12  
13

14  
15  
16 Leisure screen time was assessed using the question "Outside school, how much time do you  
17  
18 normally spend on activities that involve looking at a screen (TV, computer, tablet, mobile  
19  
20 phone) each day?" with options on a seven-point incremental scale ranging from "no time"  
21  
22 to "more than six hours". The three lower options of the variable leisure screen-time were  
23  
24 merged into one response of "less than two hours" due to the relatively low number of  
25  
26 respondents in these categories.  
27  
28  
29

30  
31 Physical activity was assessed by the question "How often do you perform physical activity  
32  
33 which gets you out of breath or makes you sweaty?" with options on a six-point incremental  
34  
35 scale ranging from "never" to "at least five times a week".  
36  
37  
38

39  
40 SES was assessed according to a five-point scale which again was based on a compound  
41  
42 score from three different dimensions (22, 23). These dimensions were: parental education,  
43  
44 "culture capital" at home based on the question "how many books do you think there are in  
45  
46 your home?", and the third dimension used four questions from the Family Affluence Scale  
47  
48 (FAS II). FAS II contains questions regarding the number of cars in the family, whether the  
49  
50 participant has her/his own bedroom, whether the participant has been on vacation and the  
51  
52 number of computers/tablets in the house. The answers were assigned different points that  
53  
54 were subsequently used to calculate a total score distributed into five equally sized groups.  
55  
56  
57  
58 Group 1 refers to the lowest SES-score and group 5 to the highest.  
59  
60

1  
2  
3 For the purpose of this study, we used the official Norwegian centrality index to define  
4  
5 residency. According to Statistics Norway, centrality is a term used to describe an index that  
6  
7 is divided into 6 groups. Group 1 contains the most central municipalities (highest index) and  
8  
9 group 6 the least central (lowest index) (24). The calculation of the index is based on travel  
10  
11 time to workplaces and service functions from all populated basic units. Residency for each  
12  
13 individual is based on where the adolescent attends school.  
14  
15  
16  
17  
18  
19  
20  
21

## 22 Statistical analyses

23  
24 The association between the various exposure variables were generated using multiple  
25  
26 regression models. We used a binomial distribution family and log and identity link functions  
27  
28 to generate relative risk and risk differences, respectively. Thus, associations were estimated  
29  
30 both on an additional and multiplicative scale. When the binomial models did not converge,  
31  
32 we used multiple Poisson regression models to estimate risk ratios (25-27). In these  
33  
34 analyses, the sandwich estimation method was used when creating the robust standard  
35  
36 errors (25). We also included interaction terms between year and gender to estimate the  
37  
38 extent to which these variables modified each other's association with the outcomes. In  
39  
40 other words, we assessed if the association between gender and energy drinks differed by  
41  
42 year and the extent to which the association between year and the consumption of ED  
43  
44 differed by gender. The independent variables in the statistical models were decided *a priori*  
45  
46 and consisted of: gender, year, grade, residency, SES, frequency of physical activity and  
47  
48 leisure screen time. The dependent variables were 1) any consumption of ED and 2) high ED  
49  
50 consumers. Values are given as relative risk (RR) with 95% confidence intervals (CI).  
51  
52  
53  
54  
55  
56  
57  
58  
59  
60

1  
2  
3 The interactions were also estimated on an additive scale using the relative excess risk due  
4 to interaction (RERI) to calculate the risk difference, and in generalized linear models with  
5  
6 to interaction (RERI) to calculate the risk difference, and in generalized linear models with  
7  
8 the binomial distribution family and identity link function (28). We used the likelihood ratio  
9  
10 test to test the significances of the interaction terms. STATA version 15.1 (College Station,  
11  
12 Texas) was used for all statistical analysis (29).  
13  
14  
15  
16  
17  
18  
19  
20  
21  
22  
23  
24  
25  
26  
27  
28  
29  
30  
31  
32  
33  
34  
35  
36  
37  
38  
39  
40  
41  
42  
43  
44  
45  
46  
47  
48  
49  
50  
51  
52  
53  
54  
55  
56  
57  
58  
59  
60

For peer review only

## RESULTS

In total, 278,891 adolescents who participated in Ungdata answered the question about ED use and were included for further analyses. Most of the adolescents attended lower secondary school (Table 1). Grade thirteen was the least represented grade in the sample, which is in line with previous findings from the Ungdata survey (22).

In 2017, missing values for gender was 6.4% compared to less than 1% in 2018 and 2019. This is likely due to the order of questions in the electronic questionnaire, which led to overlooking of the question regarding gender in the 2017 survey. This ordering of questions was changed in 2018 and 2019 (personal correspondence with staff from Ungdata).

Most of the participants lived in municipalities with the centrality index two and three. The distribution seen in Table 1 is comparable to the overall distribution of the centrality index in Norway (30). The lesser percentage in level six was expected, as there are fewer people living in these areas.

Between 20-30% of the participants reported performing some kind of physical activity where they get sweaty either 1-2, 3-4, or more than 5 times a week, while less than 10% reported 1-2 times a month or less. In addition, almost 30% of the participants spent 3-4 hours daily looking at a screen outside school time, a little more than 20% 4-6 hours daily, while more than 10% spent 6 hours or more daily on this activity.

Overall, 25% of the participants had been drinking ED less than once a week. Around 10% had been drinking ED either once or 2-3 times a week. Almost 5% of the participants reported drinking ED 4-6 times a week, while 1.5% answered that they consumed ED every day or several times a day.



### Energy drink consumption among boys and girls

Over the three years, there was a small decrease in the percentage of boys consuming ED from 67.3% (2017) to 65.7% (2019). Among girls, a small increase was found from 40.8% (2017) to 43.6% (2019) (Table 2a). However, high consumers of ED increased among both boys and girls (Table 2b). In 2017, 9.8% of the boys and 3.3% of the girls reported ED consumption in the range of high consumers, while these percentages increased to 11.5% in boys and 4.9% in girls in 2019.

### Proportion of energy drink consumption

The Poisson regression models (Table 3) revealed several possible risk factors for being a high ED consumer. The proportion of female high ED consumers increased by an average of 23% per year. There was also an increase in the proportion of high consumers of ED in boys, however, this increase was lower at 10% per year. On a multiplicative scale, the interaction between gender and year was statistically significant (Table 3). In other words, the increase among girls in the high ED consumption group was larger relative to the increase among boys in the same group. On an additive scale, however, there was no interaction as the difference in percentage points were almost identical (1.7 in boys and 1.6 in girls).

The largest proportion of high ED consumers was found in participants living in centrality index 6. Furthermore, we found a larger proportion of high ED consumers with decreasing SES. The same association was found when looking at the any ED consumption group, however, differences were less pronounced.

Compared with the participants who reported never being physically active, the proportion of high ED consumers was 50% lower for the participants who were physically active 1-2 times a week.

1  
2  
3 The proportion of high ED consumers that spent more than 6 hours looking at a screen  
4  
5 outside school hours was three times higher than the high ED consumers that spent less  
6  
7 than 2 hours looking at a screen. Regarding the participants who consumed any ED, the  
8  
9 proportion increased with increasing leisure screen time.  
10  
11  
12  
13  
14  
15  
16  
17  
18  
19  
20  
21  
22  
23  
24  
25  
26  
27  
28  
29  
30  
31  
32  
33  
34  
35  
36  
37  
38  
39  
40  
41  
42  
43  
44  
45  
46  
47  
48  
49  
50  
51  
52  
53  
54  
55  
56  
57  
58  
59  
60

For peer review only

## DISCUSSION

We found an increase in the percentage of both boys and girls being high ED consumers and a change in ED consumption according to time. We found that in total, over the three-year period, 4.2% of the girls and 10.8% of the boys were high ED consumers. There was also an annual increase in the proportion of high consumers that was most pronounced for girls increasing from 3.3% in 2017 to 4.9% in 2019. Moreover, we found that more than half of the adolescents participating in the study had consumed any ED during these three years.

In line with our expectation, we observed that the typical high ED consumer was male, had a lower SES, lived less central, spent more than 6 hours daily watching a screen, and was either not physically active or very physically active. The combination of either low or high physical activity and high leisure screen-time as predictors for ED consumption was also found in other studies from Saudi Arabia, Canada, and the U.S (3, 16, 31-33). Al-Hazza et. al proposed that the reason for why both low and high physical activity and high leisure screen-time was observed, is due to how EDs are being marketed (31). As mentioned before, this may, be due to the fact, that EDs are often marketed as boosters of an active lifestyle and higher performance. Our results also suggest that adolescents who spend much of their free time watching screens are those who consume most EDs.

Regarding the gender difference in high ED consumption, one could hypothesize that because of the marketing trends of ED focusing on masculinity and risk-taking behavior, boys are more likely to be influenced by this marketing strategy (7). However, as time passes, girls follow and adapt the same behavioral pattern, which has also been observed in other studies regarding risk taking behavior (34). This observation highlights that despite boys still being the highest consumers of ED, the increase in the proportion of female high-consumers

1  
2  
3 was larger, on a multiplicative scale but not an additive scale, compared to males over the  
4  
5 three-year period. The increase was 1.7 percentage points for boys and 1.6 for girls from  
6  
7 2017 until 2019.  
8  
9

#### 10 Limitations and strengths

11  
12  
13  
14 A limitation of the study is that we were not able to take the regional differences in  
15  
16 participation of schools each year into account, which might have confounded the observed  
17  
18 time trend seen over the three-year period. However, there seems to be a quite even  
19  
20 distribution of smaller and larger municipalities spread out across Norway participating in  
21  
22 the Ungdata study in 2017, 2018 and 2019. Moreover, the participants are not randomly  
23  
24 selected as only municipalities who wanted to participate in the Ungdata survey were  
25  
26 included in the study. In addition, the participating schools within these municipalities were  
27  
28 not selected at random. The lower secondary schools are run by the municipalities while the  
29  
30 upper secondary schools are organized according to regional districts. This might have led to  
31  
32 biases regarding representability of the study.  
33  
34  
35  
36  
37  
38

39 Other limitations common to such surveys, are that the study relies on self-reported ED  
40  
41 consumption which can be susceptible to both recall bias and social desirability bias (35).  
42  
43 Moreover, only children who attended school on the day of the survey answered the  
44  
45 questionnaire. Adolescents who were absent or had dropped out were therefore not  
46  
47 included in the study, which might have affected the results.  
48  
49  
50  
51

52 The major strength of this study is the representative and large sample included. One can  
53  
54 argue that the sample is representative because most municipalities in Norway from all  
55  
56 levels of centrality participated in the study over the three-year period. In addition, with  
57  
58  
59  
60

1  
2  
3 close to 300,000 adolescents answering the questionnaire, we had a response from 74.4% of  
4  
5 the total eligible students in this time-period.  
6  
7

8  
9 This study examined the extent and trends in ED consumption among Norwegian  
10  
11 adolescents in 2017, 2018 and 2019 according to age, gender, SES, residency, physical  
12  
13 activity and leisure screen-time. The main finding of an increasing proportion of female high  
14  
15 ED consumers is of special interest as it highlights the fact that despite male high ED  
16  
17 consumers still being the gender consuming most ED, females high ED consumers are  
18  
19 catching up. This is an important finding to considerate in future research, which should  
20  
21 focus on the possible effects of long-term ED consumption among adolescents.  
22  
23  
24  
25

## 26 Conclusion

27  
28  
29 The gender gap in high ED consumption is closing in. ED consumption is increasing among  
30  
31 female adolescents, especially high ED consumption. It is important to find out how ED  
32  
33 consumption among adolescents is related to consuming habits, body composition,  
34  
35 cognitive, and socioemotional development. In other words, the typical ED consumers add  
36  
37 to their health burden of risk taking behavior and future research should focus on the  
38  
39 consequences of this.  
40  
41  
42  
43  
44  
45  
46  
47  
48  
49  
50  
51  
52  
53  
54  
55  
56  
57  
58  
59  
60

1  
2  
3 **Footnote page**  
4  
5

6 **Abbreviations**  
7  
8

9 ED = Energy Drink  
10

11  
12 EFSA = European Food Safety Authority  
13

14  
15 FAS II = Family Affluence Scale II  
16

17  
18 NFSA = Norwegian Ministry of Health, the Norwegian Food Safety Authority  
19

20  
21 RR = Relative Risk  
22

23  
24 RERI = Relative Excess Risk due to Interaction  
25

26  
27 SES = Socio-Economic Status  
28

29  
30 VKM = Norwegian Scientific Committee for Food and Environment  
31  
32

33  
34  
35 **Acknowledgements**  
36

37  
38 The authors would like to thank NOVA (The Norwegian Social Research) for granting access  
39 to the data from the «Ungdata, 2010-2019» surveys used in the present study. The Ungdata  
40 survey is funded by The Norwegian Directorate of Health. Anonymous data has been made  
41 available for the authors by NOVA through NSD – the Norwegian Center for Research Data.  
42  
43 Neither NOVA, The Norwegian Directorate of Health or NSD are responsible for the analyses  
44 or interpretation of the presented data.  
45  
46  
47  
48  
49  
50  
51  
52  
53  
54  
55  
56  
57  
58  
59  
60

## References

1. Drikkeglede.no. Salgstall Energidrikker [updated 13-05-2020. Available from: [https://www.drikkeglede.no/tall\\_og\\_fakta/?PT\\_Radnr=5&mnd=3&aar=2020](https://www.drikkeglede.no/tall_og_fakta/?PT_Radnr=5&mnd=3&aar=2020).
2. Zucconi S. VC, Adinolfi F., Gandini E., Loi A., Fioriti L., . Gathering consumption data on specific consumer groups of energy drinks. 2013;EN-394:190.
3. Visram S, Cheetham M, Riby DM, Crossley SJ, Lake AA. Consumption of energy drinks by children and young people: a rapid review examining evidence of physical effects and consumer attitudes. *BMJ Open*. 2016;6(10):e010380.
4. VKM, Bruzell E, Carlsen MH, Granum B, Lillegaard IT, Mathisen GH, Rasinger JD, Svendsen C, Devold TG, Rohloff J, Husøy T. Risk assessment of energy drinks and caffeine. Scientific opinion of the Panel of Food Additives, Flavourings, Processing Aids, Materials in Contact with Food, and Cosmetics of the Norwegian Scientific Committee for Food and Environment., Norwegian Scientific Committee for Food and Environment (VKM); 2019. Report No.: 01.
5. Emond JA, Sargent JD, Gilbert-Diamond D. Patterns of energy drink advertising over US television networks. *Journal of nutrition education and behavior*. 2015;47(2):120-6.e1.
6. Stacey N, van Walbeek C, Maboshe M, Tugendhaft A, Hofman K. Energy drink consumption and marketing in South Africa. *Preventive medicine*. 2017;105s:S32-s6.
7. Wiggers D, Asbridge M, Baskerville NB, Reid JL, Hammond D. Exposure to Caffeinated Energy Drink Marketing and Educational Messages among Youth and Young Adults in Canada. *International journal of environmental research and public health*. 2019;16(4).
8. Dawodu A, Cleaver K. Behavioural correlates of energy drink consumption among adolescents: A review of the literature. *Journal of Child Health Care*. 2017;21(4):446-62.
9. Brand S, Kirov R. Sleep and its importance in adolescence and in common adolescent somatic and psychiatric conditions. *International journal of general medicine*. 2011;4:425-42.

- 1  
2  
3 10. Kronholm E, Puusniekka R, Jokela J, Villberg J, Urrila AS, Paunio T, et al. Trends in self-  
4 reported sleep problems, tiredness and related school performance among Finnish  
5 adolescents from 1984 to 2011. *Journal of sleep research*. 2015;24(1):3-10.  
6  
7  
8
- 9  
10 11. Iversen KL, Arnesen E, Meltzer HM, Brantsæter AL. Children and adolescents need  
11 protection against energy drinks. *Tidsskrift for den Norske lægeforening : tidsskrift for*  
12 *praktisk medicin, ny række*. 2018;138(14).  
13  
14  
15
- 16 17. Keast RS, Swinburn BA, Sayompark D, Whitelock S, Riddell LJ. Caffeine increases  
18 sugar-sweetened beverage consumption in a free-living population: a randomised controlled  
19 trial. *The British journal of nutrition*. 2015;113(2):366-71.  
20  
21  
22
- 23 24. Temple JL, Dewey AM, Briatico LN. Effects of acute caffeine administration on  
25 adolescents. *Experimental and clinical psychopharmacology*. 2010;18(6):510-20.  
26  
27  
28
- 29 30. Breda JJ, Whiting SH, Encarnacao R, Norberg S, Jones R, Reinap M, et al. Energy drink  
31 consumption in europe: a review of the risks, adverse health effects, and policy options to  
32 respond. *Frontiers in public health*. 2014;2:134.  
33  
34  
35
- 36 37. Mattilsynet. Energidrikker og koffein. Mattilsynets anbefaling til Helse- og  
38 omsorgsdepartementet. 2019.  
39  
40
- 41 42. Azagba S, Langille D, Asbridge M. An emerging adolescent health risk: caffeinated  
43 energy drink consumption patterns among high school students. *Preventive medicine*.  
44 2014;62:54-9.  
45  
46  
47
- 48 49. Sampasa-Kanyinga H, Masengo L, Hamilton H, Chaput J-P. Energy Drink Consumption  
50 and Substance Use among Middle and High School Students. *International journal of*  
51 *environmental research and public health*. 2020;17(9).  
52  
53  
54
- 55 56. Degirmenci N, Fossum IN, Strand TA, Vaktskjold A, Holten-Andersen MN.  
57 Consumption of energy drinks among adolescents in Norway: a cross-sectional study. *BMC*  
58 *public health*. 2018;18(1):1391.  
59  
60



- 1  
2  
3 19. Committee on Nutrition and the Council on Sports Medicine and Fitness. Sports  
4 drinks and energy drinks for children and adolescents: are they appropriate? *Pediatrics*.  
5 2011;127(6):1182-9.  
6  
7  
8  
9
- 10 20. Ungdata. About Ungdata 2020 [Available from: <https://www.ungdata.no/english/>.  
11  
12
- 13 21. Keute A-L, Bratholmen NVL. Upper secondary education (Videregående opplæring og  
14 annen videregående utdanning) 2020 [updated 27-02-2020. Available from:  
15 <https://www.ssb.no/vgu>.  
16  
17  
18
- 19 22. Bakken A. Ungdata. Nasjonale resultater 2019.: NOVA, OsloMet; 2019. Report No.:  
20 NOVA Rapport 9/19, .  
21  
22  
23
- 24 23. Frøyland L R. Ungdata - Lokale ungdomsundersøkelser. Dokumentasjon av variablene  
25 i spørreskjemaet. . NOVA; 2017.  
26  
27  
28  
29
- 30 24. Bloch VVH. Classification of centrality 2020 [Available from:  
31 <https://www.ssb.no/en/klass/klassifikasjoner/128/versjon/1292/om>.  
32  
33  
34  
35
- 36 25. Zou G. A modified poisson regression approach to prospective studies with binary  
37 data. *American journal of epidemiology*. 2004;159(7):702-6.  
38  
39  
40
- 41 26. Knol MJ, Le Cessie S, Algra A, Vandenbroucke JP, Groenwold RH. Overestimation of  
42 risk ratios by odds ratios in trials and cohort studies: alternatives to logistic regression. *CMAJ*  
43 : Canadian Medical Association journal = journal de l'Association medicale canadienne.  
44 2012;184(8):895-9.  
45  
46  
47  
48  
49
- 50 27. Rojanaworarit C, Wong JJ. Investigating the Source of a Disease Outbreak Based on  
51 Risk Estimation: A Simulation Study Comparing Risk Estimates Obtained From Logistic and  
52 Poisson Regression Applied to a Dichotomous Outcome. *The Ochsner journal*.  
53 2019;19(3):220-6.  
54  
55  
56  
57  
58  
59  
60

- 1  
2  
3 28. Richardson DB, Kaufman JS. Estimation of the relative excess risk due to interaction  
4 and associated confidence bounds. *American journal of epidemiology*. 2009;169(6):756-60.  
5  
6  
7
- 8 29. StataCorp. *Stata Statistical Software: Release 15*. College Station, TX: StataCorp LLC;  
9 2017.  
10  
11
- 12  
13 30. Høydahl E. *Ny sentralitetsindes for kommunene - New centrality index for the*  
14 *municipalities*. Statistics Norway; 2017.  
15  
16
- 17  
18 31. Al-Hazaa HM, Al-Sobayel HI, Abahussain NA, Qahwaji DM, Alahmadi MA, Musaiger  
19 AO. Association of dietary habits with levels of physical activity and screen time among  
20 adolescents living in Saudi Arabia. *Journal of Human Nutrition & Dietetics*. 2014;27 Suppl  
21 2:204-13.  
22  
23  
24
- 25  
26  
27 32. Larson N, DeWolfe J, Story M, Neumark-Sztainer D. Adolescent Consumption of  
28 Sports and Energy Drinks: Linkages to Higher Physical Activity, Unhealthy Beverage Patterns,  
29 Cigarette Smoking, and Screen Media Use. *Journal of Nutrition Education & Behavior*.  
30 2014;46(3):181-7.  
31  
32
- 33  
34  
35 33. Nowak D, Jasionowski A. Analysis of the Consumption of Caffeinated Energy Drinks  
36 among Polish Adolescents. *International Journal of Environmental Research & Public Health*  
37 [Electronic Resource]. 2015;12(7):7910-21.  
38  
39  
40
- 41  
42  
43 34. Abbott-Chapman J, Denholm C, Wyld C. Gender Differences in Adolescent Risk  
44 Taking: Are They Diminishing?:An Australian Intergenerational Study. *Youth & Society*.  
45 2008;40(1):131-54.  
46  
47  
48
- 49  
50 35. Rothman K. J. *Epidemiology: An Introduction*. 2nd ed. New York: Oxford University  
51 Press; 2002.  
52  
53  
54  
55  
56  
57  
58  
59  
60

1  
2  
3  
4  
5  
6  
7  
8  
9  
10  
11  
12  
13  
14  
15  
16  
17  
18  
19  
20  
21  
22  
23  
24  
25  
26  
27  
28  
29  
30  
31  
32  
33  
34  
35  
36  
37  
38  
39  
40  
41  
42  
43  
44  
45  
46

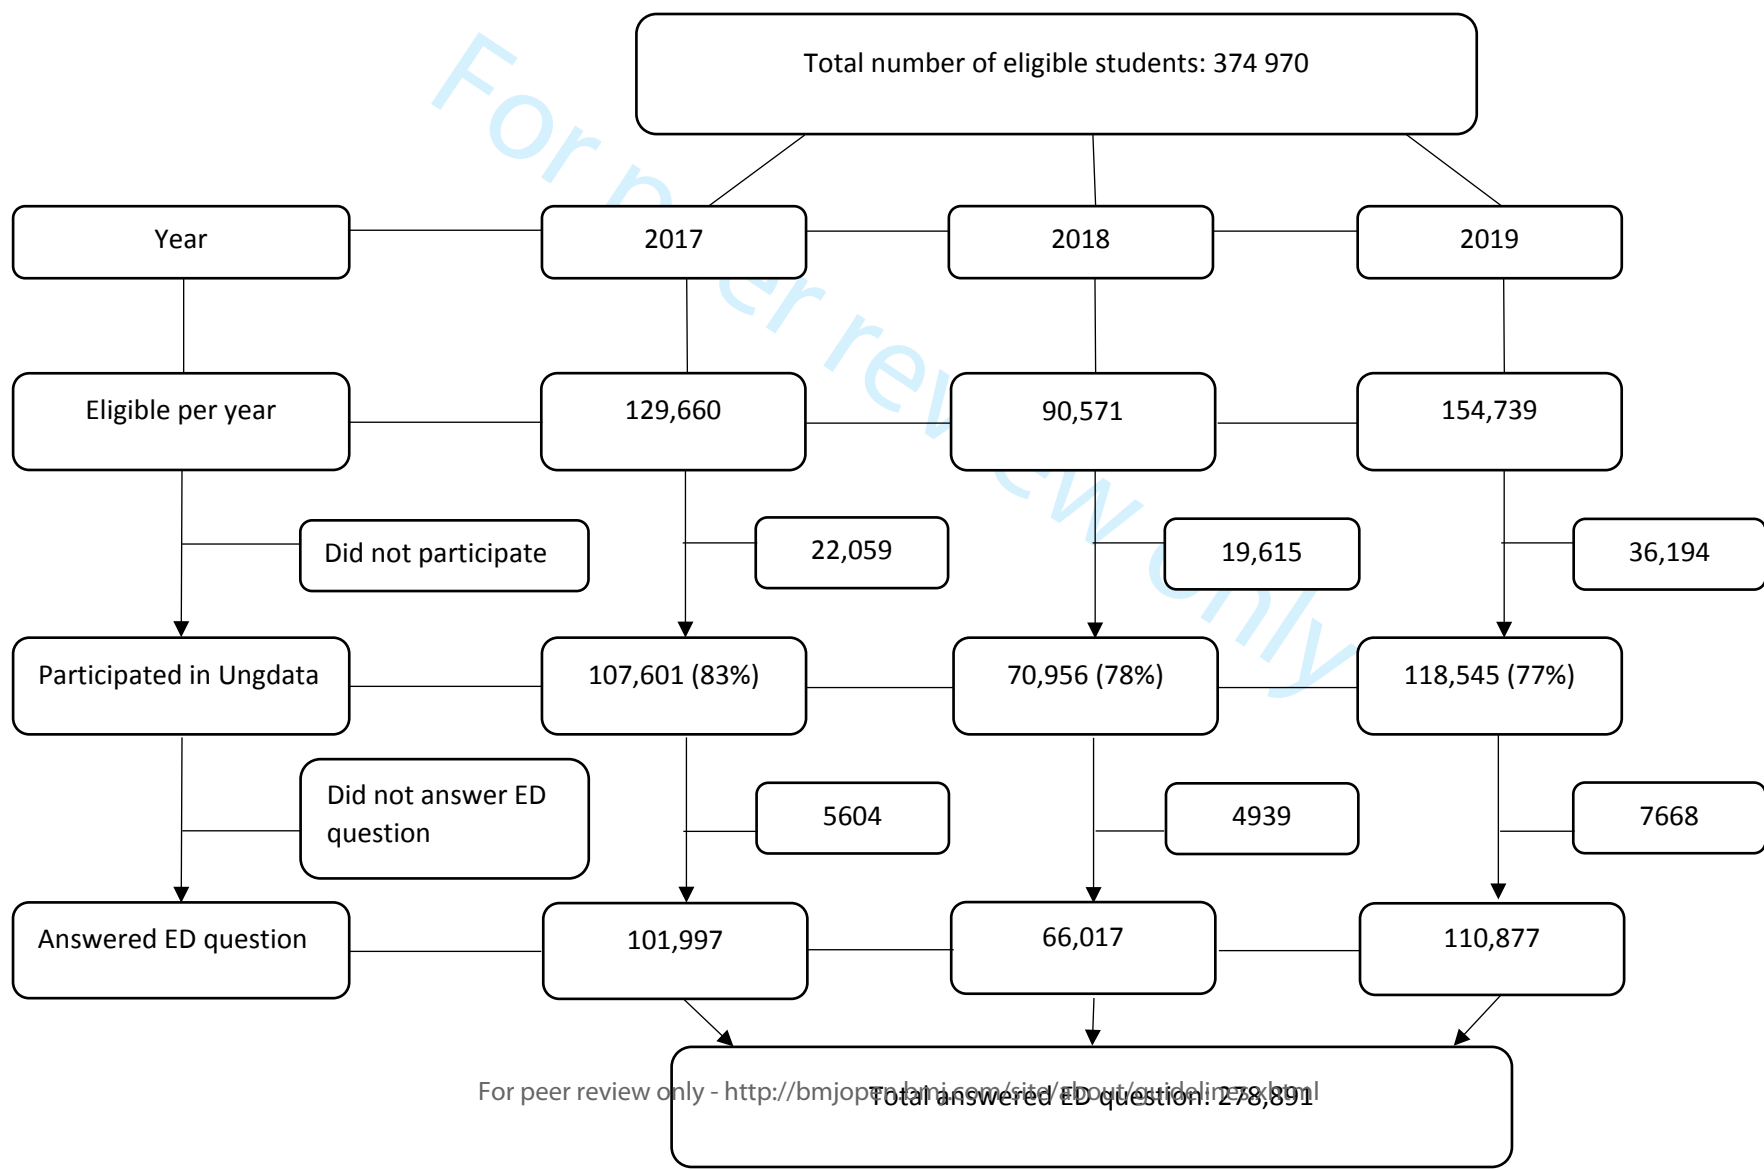

Table 1. Baseline Characteristics of Adolescents in 2017, 2018 and 2019.

| VARIABLE                              | TOTAL (%)      | 2017 (%)      | 2018 (%)      | 2019 (%)      |
|---------------------------------------|----------------|---------------|---------------|---------------|
| <b>N</b>                              | 278,891        | 101,997       | 66,017        | 110,877       |
| <b>SCHOOL LEVEL</b>                   |                |               |               |               |
| <i>LOWER SECONDARY</i>                | 160,352 (57.5) | 61,768 (60.6) | 38,256 (57.9) | 60,328 (54.4) |
| <i>UPPER SECONDARY</i>                | 118,539 (42.5) | 40,229 (39.4) | 27,761 (42.1) | 50,549 (45.6) |
| <b>GRADE</b>                          |                |               |               |               |
| 8                                     | 52,984 (19.0)  | 20,381 (20.0) | 12,695 (19.2) | 19,908 (18.0) |
| 9                                     | 51,393 (18.4)  | 19,514 (19.1) | 12,558 (19.0) | 19,321 (17.4) |
| 10                                    | 50,547 (18.1)  | 19,632 (19.2) | 11,687 (17.7) | 19,228 (17.3) |
| 11                                    | 50,972 (18.3)  | 18,580 (18.2) | 11,190 (16.9) | 21,202 (19.1) |
| 12                                    | 40,391 (14.5)  | 12,824 (12.6) | 9360 (14.2)   | 18,207 (16.4) |
| 13                                    | 26,351 (9.5)   | 8632 (8.5)    | 7091 (10.7)   | 10,628 (9.6)  |
| <i>MISSING</i>                        | 6253 (2.2)     | 2434 (2.4)    | 1436 (2.2)    | 2383 (2.2)    |
| <b>GENDER</b>                         |                |               |               |               |
| <i>FEMALE</i>                         | 138,218 (49.6) | 47,218 (46.3) | 31,802 (48.2) | 54,020 (48.7) |
| <i>MALE</i>                           | 133,040 (47.7) | 48,254 (47.3) | 33,908 (51.4) | 56,056 (50.6) |
| <i>MISSING</i>                        | 7633 (2.7)     | 6525 (6.4)    | 307 (0.5)     | 801 (0.7)     |
| <b>RESIDENCY</b>                      |                |               |               |               |
| <b>CENTRALITY</b>                     |                |               |               |               |
| 1                                     | 56,012 (20.2)  | 14,909 (14.7) | 22,358 (34.0) | 18,745 (16.9) |
| 2                                     | 63,413 (22.8)  | 30,793 (30.5) | 5601 (8.5)    | 27,019 (24.4) |
| 3                                     | 74,853 (26.9)  | 23,190 (22.9) | 16,117 (25.5) | 35,546 (32.1) |
| 4                                     | 46,826 (16.9)  | 16,688 (16.5) | 11,286 (17.1) | 18,852 (17.0) |
| 5                                     | 27,900 (10.0)  | 12,358 (12.2) | 7609 (11.6)   | 7933 (7.1)    |
| 6                                     | 8847 (3.2)     | 3195 (3.2)    | 2870 (4.4)    | 2782 (2.5)    |
| <b>FREQUENCY OF PHYSICAL ACTIVITY</b> |                |               |               |               |
| <i>NEVER</i>                          | 4518 (1.6)     | 1374 (1.3)    | 1218 (1.8)    | 1926 (1.7)    |
| <i>SELDOM</i>                         | 19,642 (7.0)   | 6314 (6.2)    | 4997 (7.6)    | 8331 (7.5)    |
| <i>1-2 TIMES A MONTH</i>              | 18,007 (6.5)   | 6105 (6.0)    | 4709 (7.1)    | 7193 (6.5)    |

|                                  |                |               |               |               |
|----------------------------------|----------------|---------------|---------------|---------------|
| 1-2 TIMES A WEEK                 | 75,687 (27.1)  | 26,901 (26.4) | 18,484 (28.0) | 30,302 (27.3) |
| 3-4 TIMES A WEEK                 | 89,537 (32.1)  | 33,164 (32.5) | 20,458 (31.0) | 35,915 (32.4) |
| ≥ 5 TIMES A WEEK                 | 65,897 (23.6)  | 25,472 (25.0) | 14,402 (21.8) | 26,023 (23.5) |
| MISSING                          | 5603 (2.0)     | 2667 (2.6)    | 1749 (2.7)    | 1187 (1.1)    |
| <b>LEISURE SCREEN TIME</b>       |                |               |               |               |
| ≤ 2 HOURS DAILY                  | 43,234 (15.5)  | 17,734 (17.4) | 10,355 (15.7) | 15,145 (13.7) |
| 2-3 HOURS DAILY                  | 60,567 (21.7)  | 22,786 (22.3) | 14,284 (21.6) | 23,497 (21.2) |
| 3-4 HOURS DAILY                  | 75,781 (27.2)  | 27,296 (26.8) | 17,654 (26.7) | 30,831 (27.8) |
| 4-6 HOURS DAILY                  | 59,250 (21.2)  | 20,379 (20.0) | 13,878 (21.0) | 24,993 (22.5) |
| ≥ 6 HOURS DAILY                  | 36,168 (13.0)  | 12,563 (12.3) | 8873 (13.4)   | 14,732 (13.3) |
| MISSING                          | 3891 (1.4)     | 1239 (1.2)    | 973 (1.5)     | 1679 (1.5)    |
| <b>ENERGY DRINKS CONSUMPTION</b> |                |               |               |               |
| NEVER                            | 128,365 (46.0) | 46,782 (45.9) | 31,055 (47.0) | 50,528 (45.6) |
| < ONCE A WEEK                    | 71,200 (25.5)  | 27,530 (27.0) | 16,594 (25.1) | 27,076 (24.4) |
| ONCE A WEEK                      | 29,653 (10.6)  | 10,936 (10.7) | 6784 (10.3)   | 11,933 (10.8) |
| 2-3 TIMES A WEEK                 | 28,974 (10.4)  | 10,065 (9.9)  | 6595 (10.0)   | 12,314 (11.1) |
| 4-6 TIMES A WEEK                 | 12,310 (4.4)   | 4038 (4.0)    | 2843 (4.3)    | 5429 (4.9)    |
| EVERY DAY                        | 4080 (1.5)     | 1250 (1.2)    | 1005 (1.5)    | 1825 (1.6)    |
| SEVERAL TIMES A DAY              | 4309 (1.5)     | 1396 (1.4)    | 1141 (1.7)    | 1772 (1.6)    |

Table 2a. ED Consumption per Year and Gender.

|                       | TOTAL (%)     |               | 2017 (%)      |               | 2018 (%)      |               | 2019 (%)      |               |
|-----------------------|---------------|---------------|---------------|---------------|---------------|---------------|---------------|---------------|
|                       | Male          | Female        | Male          | Female        | Male          | Female        | Male          | Female        |
| <b>ED CONSUMPTION</b> | 133,040       | 138,218       | 47,218        | 48,254        | 31,802        | 33,908        | 54,020        | 56,056        |
| NEVER                 | 44,667 (33.6) | 80,402 (58.2) | 15,433 (32.7) | 28,554 (59.2) | 10,705 (33.7) | 20,206 (59.6) | 18,529 (34.3) | 31,642 (56.4) |
| ANY ED                | 88,373 (66.4) | 57,816 (41.8) | 31,785 (67.3) | 19,700 (40.8) | 21,097 (66.3) | 13,702 (40.4) | 35,491 (65.7) | 24,414 (43.6) |

ED; Energy drink

Table 2b. ED Consumption per Year and Gender.

|                       | TOTAL (%)      |                | 2017 (%)      |               | 2018 (%)      |               | 2019 (%)      |               |
|-----------------------|----------------|----------------|---------------|---------------|---------------|---------------|---------------|---------------|
|                       | Male           | Female         | Male          | Female        | Male          | Female        | Male          | Female        |
| <b>ED CONSUMPTION</b> | 133,040        | 138,218        | 47,218        | 48,254        | 31,802        | 33,908        | 54,020        | 56,056        |
| NEVER/ANY             | 118,676 (89.2) | 132,478 (95.8) | 42,598 (90.2) | 46,683 (96.7) | 28,248 (88.8) | 32,498 (95.8) | 47,830 (88.5) | 53,297 (95.1) |
| HIGH                  | 14,364 (10.8)  | 5740 (4.2)     | 4620 (9.8)    | 1571 (3.3)    | 3554 (11.2)   | 1410 (4.2)    | 6190 (11.5)   | 2759 (4.9)    |

ED; Energy drink

Table 3. Modified Poisson Regression With Interaction Term According to ED Consumers and High ED Consumers.

| VARIABLE                                  | TOTAL SAMPLE |  | ED CONSUMERS |      | HIGH ED CONSUMERS |      |      |            |
|-------------------------------------------|--------------|--|--------------|------|-------------------|------|------|------------|
|                                           | n            |  | n            | RR   | 95% CI            | n    | RR   | 95% CI     |
| <b>INTERACTION TERMS</b>                  |              |  |              | 1    |                   |      | 1    |            |
| <i>INTERACTION GENDER AND YEAR - 2018</i> |              |  |              | 0.99 | 0.96, 1.02        |      | 0.89 | 0.81, 0.97 |
| <i>INTERACTION GENDER AND YEAR - 2019</i> |              |  |              | 0.91 | 0.89, 0.94        |      | 0.77 | 0.71, 0.83 |
| <b>SUBGROUPS</b>                          |              |  |              |      |                   |      |      |            |
| <b>YEAR</b>                               |              |  |              |      |                   |      |      |            |
| <i>2017 FEMALE</i>                        | 48,254       |  | 19,700       | 1    |                   | 1571 | 1    |            |
| <i>2018 FEMALE</i>                        | 33,908       |  | 13,702       | 0.98 | 0.96, 1.01        | 1410 | 1.24 | 1.15, 1.34 |
| <i>2019 FEMALE</i>                        | 56,056       |  | 24,414       | 1.05 | 1.03, 1.07        | 2759 | 1.46 | 1.37, 1.55 |
| <i>2017 MALE</i>                          | 47,218       |  | 31,785       | 1    |                   | 4620 | 1    |            |
| <i>2018 MALE</i>                          | 31,802       |  | 21,097       | 0.98 | 0.96, 1.00        | 3554 | 1.10 | 1.05, 1.16 |
| <i>2019 MALE</i>                          | 54,020       |  | 35,491       | 0.96 | 0.95, 0.98        | 6190 | 1.12 | 1.07, 1.16 |
| <b>GENDER</b>                             |              |  |              |      |                   |      |      |            |
| <i>FEMALE</i>                             | 138,218      |  | 57,816       | 1    |                   | 5740 | 1    |            |

|    |                             |        |        |      |            |      |      |            |
|----|-----------------------------|--------|--------|------|------------|------|------|------------|
| 1  |                             |        |        |      |            |      |      |            |
| 2  |                             |        |        |      |            |      |      |            |
| 3  | <i>MALE 2017</i>            | 47,218 | 31,785 | 1.63 | 1.61, 1.66 | 4620 | 2.79 | 2.63, 2.97 |
| 4  |                             |        |        |      |            |      |      |            |
| 5  | <i>MALE 2018</i>            | 31,802 | 21,097 | 1.62 | 1.59, 1.66 | 3554 | 2.48 | 2.33, 2.65 |
| 6  |                             |        |        |      |            |      |      |            |
| 7  | <i>MALE 2019</i>            | 54,020 | 35,491 | 1.49 | 1.47, 1.52 | 6190 | 2.14 | 2.04, 2.24 |
| 8  |                             |        |        |      |            |      |      |            |
| 9  | <b>GRADE</b>                |        |        |      |            |      |      |            |
| 10 |                             |        |        |      |            |      |      |            |
| 11 | 8                           | 52,984 | 22,741 | 1    |            | 2533 | 1    |            |
| 12 |                             |        |        |      |            |      |      |            |
| 13 | 9                           | 51,393 | 26,914 | 1.20 | 1.18, 1.22 | 3224 | 1.25 | 1.18, 1.32 |
| 14 |                             |        |        |      |            |      |      |            |
| 15 | 10                          | 50,547 | 28,215 | 1.26 | 1.24, 1.29 | 3654 | 1.39 | 1.32, 1.47 |
| 16 |                             |        |        |      |            |      |      |            |
| 17 | 11                          | 50,972 | 30,154 | 1.34 | 1.32, 1.36 | 4756 | 1.78 | 1.70, 1.88 |
| 18 |                             |        |        |      |            |      |      |            |
| 19 | 12                          | 40,391 | 23,925 | 1.34 | 1.32, 1.37 | 3886 | 1.84 | 1.75, 1.94 |
| 20 |                             |        |        |      |            |      |      |            |
| 21 | 13                          | 26,351 | 14,864 | 1.32 | 1.29, 1.35 | 2154 | 1.73 | 1.63, 1.82 |
| 22 |                             |        |        |      |            |      |      |            |
| 23 | <b>RESIDENCY</b>            |        |        |      |            |      |      |            |
| 24 |                             |        |        |      |            |      |      |            |
| 25 | 1                           | 56,012 | 26,965 | 1    |            | 3254 | 1    |            |
| 26 |                             |        |        |      |            |      |      |            |
| 27 | 2                           | 63,413 | 32,609 | 1.06 | 1.04, 1.08 | 4355 | 1.20 | 1.14, 1.26 |
| 28 |                             |        |        |      |            |      |      |            |
| 29 | 3                           | 74,853 | 40,723 | 1.11 | 1.09, 1.13 | 5738 | 1.27 | 1.22, 1-33 |
| 30 |                             |        |        |      |            |      |      |            |
| 31 | 4                           | 46,826 | 27,433 | 1.20 | 1.18, 1.22 | 4077 | 1.46 | 1.39, 1.53 |
| 32 |                             |        |        |      |            |      |      |            |
| 33 | 5                           | 27,900 | 16,895 | 1.25 | 1.22, 1.28 | 2467 | 1.54 | 1.46, 1.63 |
| 34 |                             |        |        |      |            |      |      |            |
| 35 | 6                           | 8847   | 5329   | 1.24 | 1.19, 1.28 | 750  | 1.58 | 1.43, 1.75 |
| 36 |                             |        |        |      |            |      |      |            |
| 37 | <b>SOCIOECONOMIC STATUS</b> |        |        |      |            |      |      |            |
| 38 |                             |        |        |      |            |      |      |            |
| 39 | 5 HIGHEST                   | 56,418 | 28,084 | 1    |            | 3133 | 1    |            |
| 40 |                             |        |        |      |            |      |      |            |
| 41 |                             |        |        |      |            |      |      |            |
| 42 |                             |        |        |      |            |      |      |            |
| 43 |                             |        |        |      |            |      |      |            |
| 44 |                             |        |        |      |            |      |      |            |
| 45 |                             |        |        |      |            |      |      |            |
| 46 |                             |        |        |      |            |      |      |            |



|                            |        |        |      |            |      |      |            |
|----------------------------|--------|--------|------|------------|------|------|------------|
| 4                          | 55,641 | 29,692 | 1.03 | 1.02, 1.05 | 3665 | 1.11 | 1.05, 1.16 |
| 3                          | 55,935 | 30,532 | 1.05 | 1.04, 1.07 | 4199 | 1.21 | 1.15, 1.27 |
| 2                          | 55,947 | 31,269 | 1.07 | 1.05, 1.08 | 4542 | 1.28 | 1.22, 1.35 |
| 1 LOWEST                   | 54,950 | 30,949 | 1.08 | 1.06, 1.09 | 5160 | 1.43 | 1.36, 1.50 |
| <b>PHYSICAL ACTIVITY</b>   |        |        |      |            |      |      |            |
| NEVER                      | 4518   | 2481   | 1    |            | 782  | 1    |            |
| SELDOM                     | 19,642 | 11,086 | 1.05 | 1.00, 1.09 | 2002 | 0.65 | 0.59, 0.70 |
| 1-2 TIMES A MONTH          | 18,007 | 9903   | 1.04 | 1.00, 1.09 | 1357 | 0.53 | 0.48, 0.58 |
| 1-2 TIMES A WEEK           | 75,687 | 40,581 | 1.02 | 0.97, 1.06 | 5058 | 0.50 | 0.46, 0.54 |
| 3-4 TIMES A WEEK           | 89,537 | 47,874 | 1.03 | 0.99, 1.07 | 5614 | 0.52 | 0.48, 0.58 |
| ≥ 5 TIMES A WEEK           | 65,897 | 35,312 | 1.00 | 0.96, 1.04 | 5173 | 0.62 | 0.57, 0.67 |
| <b>LEISURE SCREEN TIME</b> |        |        |      |            |      |      |            |
| ≤ 2 HOURS DAILY            | 43,234 | 18,797 | 1    |            | 1978 | 1    |            |
| 2-3 HOURS DAILY            | 60,567 | 28,922 | 1.10 | 0.96, 1.04 | 2659 | 1.0  | 0.94, 1.07 |
| 3-4 HOURS DAILY            | 75,781 | 40,778 | 1.22 | 1.20, 1.24 | 4514 | 1.33 | 1.25, 1.40 |
| 4-6 HOURS DAILY            | 59,250 | 35,462 | 1.32 | 1.30, 1.34 | 4950 | 1.79 | 1.69, 1.89 |
| ≥ 6 HOURS DAILY            | 36,168 | 24,214 | 1.42 | 1.39, 1.45 | 6026 | 3.16 | 2.99, 3.33 |

ED: Energy drink; RR: Relative Risk; CI: Confidence Interval; <sub>a</sub> Modified Poisson regression with robust variance estimation; <sub>b</sub> Estimates are statistically significant if their CIs do not include 1.0.

# BMJ Open

## Recent Development in Energy Drink Consumption among Adolescents in Norway: a cross-sectional study

|                                 |                                                                                                                                                                                                                                                                                                                                                                                                                                                                                                                                                                                                                                                                 |
|---------------------------------|-----------------------------------------------------------------------------------------------------------------------------------------------------------------------------------------------------------------------------------------------------------------------------------------------------------------------------------------------------------------------------------------------------------------------------------------------------------------------------------------------------------------------------------------------------------------------------------------------------------------------------------------------------------------|
| Journal:                        | <i>BMJ Open</i>                                                                                                                                                                                                                                                                                                                                                                                                                                                                                                                                                                                                                                                 |
| Manuscript ID                   | bmjopen-2021-049284.R1                                                                                                                                                                                                                                                                                                                                                                                                                                                                                                                                                                                                                                          |
| Article Type:                   | Original research                                                                                                                                                                                                                                                                                                                                                                                                                                                                                                                                                                                                                                               |
| Date Submitted by the Author:   | 05-May-2021                                                                                                                                                                                                                                                                                                                                                                                                                                                                                                                                                                                                                                                     |
| Complete List of Authors:       | Kaldenbach, Siri; Sykehuset Innlandet HF, Department of Paediatric and Adolescent Medicine, Innlandet Hospital Trust; University of Oslo Faculty of Medicine, Clinical Medicine<br>Strand, Tor A.; Sykehuset Innlandet HF, Research Department, Innlandet Hospital Trust; University of Bergen Centre for International Health<br>Solvik, Beate; Sykehuset Innlandet HF, Women's Clinic, Innlandet Hospital Trust; University of Bergen Centre for International Health<br>Holten-Andersen, Mads; Sykehuset Innlandet HF, Department of Paediatric and Adolescent Medicine, Innlandet Hospital Trust; University of Oslo Faculty of Medicine, Clinical Medicine |
| <b>Primary Subject Heading</b>: | Public health                                                                                                                                                                                                                                                                                                                                                                                                                                                                                                                                                                                                                                                   |
| Secondary Subject Heading:      | Epidemiology, Nutrition and metabolism                                                                                                                                                                                                                                                                                                                                                                                                                                                                                                                                                                                                                          |
| Keywords:                       | NUTRITION & DIETETICS, Community child health < PAEDIATRICS, PUBLIC HEALTH                                                                                                                                                                                                                                                                                                                                                                                                                                                                                                                                                                                      |
|                                 |                                                                                                                                                                                                                                                                                                                                                                                                                                                                                                                                                                                                                                                                 |

SCHOLARONE™  
Manuscripts



I, the Submitting Author has the right to grant and does grant on behalf of all authors of the Work (as defined in the below author licence), an exclusive licence and/or a non-exclusive licence for contributions from authors who are: i) UK Crown employees; ii) where BMJ has agreed a CC-BY licence shall apply, and/or iii) in accordance with the terms applicable for US Federal Government officers or employees acting as part of their official duties; on a worldwide, perpetual, irrevocable, royalty-free basis to BMJ Publishing Group Ltd ("BMJ") its licensees and where the relevant Journal is co-owned by BMJ to the co-owners of the Journal, to publish the Work in this journal and any other BMJ products and to exploit all rights, as set out in our [licence](#).

The Submitting Author accepts and understands that any supply made under these terms is made by BMJ to the Submitting Author unless you are acting as an employee on behalf of your employer or a postgraduate student of an affiliated institution which is paying any applicable article publishing charge ("APC") for Open Access articles. Where the Submitting Author wishes to make the Work available on an Open Access basis (and intends to pay the relevant APC), the terms of reuse of such Open Access shall be governed by a Creative Commons licence – details of these licences and which [Creative Commons](#) licence will apply to this Work are set out in our licence referred to above.

Other than as permitted in any relevant BMJ Author's Self Archiving Policies, I confirm this Work has not been accepted for publication elsewhere, is not being considered for publication elsewhere and does not duplicate material already published. I confirm all authors consent to publication of this Work and authorise the granting of this licence.

## Title page

### Title: Recent Development in Energy Drink Consumption among Adolescents in Norway: a cross-sectional study

Siri Kaldenbach<sup>1, 2</sup>, Tor A. Strand<sup>3, 4</sup>, Beate Stokke Solvik<sup>4, 5</sup>, Mads Holten-Andersen<sup>1, 2</sup>

#### Author's information

Corresponding author: Siri Kaldenbach

Address: Anders Sandvigsgate 17, 2609 Lillehammer, Norway.

Email: [siri.kaldenbach@sykehuset-innlandet.no](mailto:siri.kaldenbach@sykehuset-innlandet.no)

Telephone: +4741086031

#### Departments

1. Sykehuset Innlandet HF, Department of Paediatric and Adolescent Medicine, Innlandet Hospital Trust  
Lillehammer, NO
2. University of Oslo, Institute of Clinical Medicine  
Oslo, NO  
+4741086031

#### Co-authors

Tor A. Strand

3. Sykehuset Innlandet HF, Research Department, Innlandet Hospital Trust  
Lillehammer, NO  
+4790971086
4. University of Bergen, Centre for International Health  
Bergen, NO  
+4790971086

Beate Stokke Solvik

5. Sykehuset Innlandet HF, Women's Clinic, Innlandet Hospital Trust  
Lillehammer, NO  
+4793292801
4. University of Bergen, Center for International Health  
Bergen, NO  
+4793292801

1  
2  
3 Mads Holten-Andersen  
4

- 5 1. Sykehuset Innlandet HF, Department of Paediatric and Adolescent Medicine,  
6 Innlandet Hospital Trust  
7 Lillehammer, NO  
8 +4741487829  
9  
10 2. University of Oslo, Institute of Clinical Medicine  
11 Oslo, NO  
12 +4741487829  
13  
14  
15

16  
17 **Word count abstract: 240**  
18

19  
20 **Word count: 3336**  
21  
22  
23  
24  
25  
26  
27  
28  
29  
30  
31  
32  
33  
34  
35  
36  
37  
38  
39  
40  
41  
42  
43  
44  
45  
46  
47  
48  
49  
50  
51  
52  
53  
54  
55  
56  
57  
58  
59  
60

1  
2  
3 **Recent Development in Energy Drink Consumption among Adolescents in Norway: a cross-**  
4 **sectional study**  
5  
6  
7

8 **Objectives:** To describe the social determinants and development in energy drink  
9 consumption among Norwegian adolescents in 2017, 2018 and 2019.  
10  
11  
12

13  
14 **Design:** Cross-sectional, online, annual, nationwide surveys (Ungdata).  
15  
16

17 **Setting:** Responses collected online from January 2017 to December 2019.  
18  
19

20 **Participants:** Lower- and upper secondary school students (n=278,891) aged 12-19 years  
21 who responded in 2017, 2018, and 2019.  
22  
23  
24

25 **Main outcome measures:** Frequency of energy drink consumption.  
26  
27

28  
29 **Results:** Over the three-year period, 66.4% of the males and 41.8% of the females had  
30 consumed energy drink once a week or more. The proportion of female high consumers  
31 (consuming energy drink more than 4 times a week) increased from 3.3% to 4.9% between  
32 2017 and 2019; for males, the increase was from 9.8% to 11.5%. In females the proportion of  
33 high consumers increased with 24% (relative risk (RR); CI) (1.24; 1.15, 1.34) from 2017 to  
34 2018, and 46% (1.46; 1.37, 1.55) from 2017 to 2019. The corresponding increases in males  
35 were 10% (1.10; 1.05, 1.16) from 2017 to 2018, and 12% (1.12; 1.07, 1.16) from 2017 to  
36 2019. Any energy drink consumption as well as high energy drink consumption were  
37 independently associated with school level, less central residency, low socioeconomic status,  
38 physical inactivity, and high leisure screen time.  
39  
40  
41  
42  
43  
44  
45  
46  
47  
48  
49  
50  
51

52  
53  
54 **Conclusion:** We found an increase in high consumers among both boys and girls between  
55 2017 and 2019. The observed increase in energy drink consumption among adolescents can  
56 explain some of the increased sales of energy drink in Norway.  
57  
58  
59  
60

## Article summary

### Strengths and limitations of this study:

- This study identifies recent development in the frequency of energy drink consumption among adolescents in Norway.
- Data are derived from a large, annual, national survey in Norway including nearly 300,000 adolescents over three years from 2017 to 2019.
- The study relies on self-reported energy drink consumption, which can be susceptible to both recall bias and social desirability bias.

## INTRODUCTION

Being marketed as a booster of mental and physical capacity, energy drinks (ED) have gained worldwide popularity. In Norway, ED sales increased by more than 50% from 2017 to 2019.(1) ED are defined as non-alcoholic beverages that contain at least 150 mg caffeine per liter, in addition to sugar combined with one or more substances known to have stimulant properties.(2-4) Moreover, vitamins, minerals, and amino acids are often added to ED.(4) ED marketing is often targeted toward athletes and the adolescent population. Moreover, viewers of TV-channels with greater ED advertising have increased odds of ED consumption.(5-7)

ED consumption among children and adolescents has been linked to potential negative effects such as increased cardiovascular symptoms with increased cardiac output, but also elevated systolic and diastolic blood pressure.(8) Moreover, sleep disturbance, nervousness, and headache have been reported.(9-12) These potential adverse effects can result in tiredness, inattention, reduced school performance, and increased mental distress. The main cause for concern is the high level of caffeine in ED combined with added sugar and sweet flavor, next to the high content of stimulating substances.(13) According to Iversen et. al, this combination of ingredients may cause faster uptake of caffeine into the circulation compared to regular coffee.(13) Moreover, studies have indicated that adding caffeine to sugar-sweetened beverages (SSB) leads to increased use of SSB, which in turn results in increased energy intake.(14, 15) The high energy intake may contribute to overweight and obesity, as well as dental caries due to the high sugar and citric acid content of ED and SSB.(16)



1  
2  
3 In 2013, the European Food Safety Authority (EFSA) published a report on ED use, indicating  
4 that children and adolescents aged 10-18 years had the highest reported consumption  
5 (68%), compared with adults above 18 years (30%) and children below 10 years (18%).(3)  
6  
7

8  
9  
10 The potential negative effects of ED in children and adolescents have gained the attention of  
11 government authorities in several countries, of which some have issued restrictions on the  
12 caffeine content in ED.(17) The Norwegian Food Safety Authority (NFSA) has stated that the  
13 daily intake of caffeine for children and adolescents should not exceed 2.5 mg/kg. This was  
14 decided based on a review of current knowledge by the Norwegian Scientific Committee for  
15 Food and Environment (VKM).(4)  
16  
17

18 According to the findings of the VKM review, a child or youth would have a risk of sleep  
19 disturbance with an intake of 1.4 mg/kg body weight/day of caffeine.(4) Furthermore, the  
20 risk of negative health effects on the heart and central nervous system would be present at  
21 an intake of 3 mg/kg body weight/day of caffeine. This would mean that a 13-15 years old  
22 adolescent with an average weight of 50 kg would be at risk of sleep disturbance when  
23 drinking more than 70 mg/day of caffeine and at risk of adverse cardiac and central  
24 neurologic effects at daily consumption of 150 mg/day. These values are in line with  
25 recommendations by EFSA and correspond to an intake of one to two large cans (500ml) of  
26 ED for an adolescent described above.(4)  
27  
28

29 ED consumption varies according to age and gender. Several studies have found that male  
30 adolescents are more likely to consume ED than their female counterparts. Moreover, young  
31 (male) adolescents at middle school level have a higher ED consumption compared to older  
32 adolescents at high school level.(3, 18, 19) Furthermore, Degirmenci et al. found that high  
33 consumption (> 4 times a week) of ED was independently associated with male gender,  
34  
35  
36  
37  
38  
39  
40  
41  
42  
43  
44  
45  
46  
47  
48  
49  
50  
51  
52  
53  
54  
55  
56  
57  
58  
59  
60

1  
2  
3 physical inactivity, high leisure screen time, low socioeconomic status, and rural  
4  
5 residency.(20)

6  
7  
8 Of special concern for potential adverse effects are children and adolescents who have lower  
9  
10 body weight, and are more sensitive to ED stimulants, including caffeine. According to the  
11  
12 American Academy of Pediatrics; “Caffeine and other stimulants contained in energy drinks  
13  
14 have no place in the diet of children and adolescents”.(21) Despite the aforementioned  
15  
16 increased sales of ED in Norway, the extent to which the consumption of ED among children  
17  
18 and adolescents followed this development remains unclear.(17) The objective of the  
19  
20 current study is to describe the social determinants and development in energy drink  
21  
22 consumption among Norwegian adolescents in 2017, 2018, and 2019. Potential social  
23  
24 determinants include age, gender, socio-economic status (SES), residency, physical activity,  
25  
26 and leisure screen time.  
27  
28  
29  
30  
31  
32  
33  
34  
35  
36  
37  
38  
39  
40  
41  
42  
43  
44  
45  
46  
47  
48  
49  
50  
51  
52  
53  
54  
55  
56  
57  
58  
59  
60

## METHODS

### Study design and participants

Data for the study was collected through the Ungdata survey, a national, annual, survey, mapping the health and well-being of lower and upper secondary school students in Norway. The study was approved by the Norwegian Centre for Research Data. Detailed information regarding the survey can be found on [www.ungdata.no](http://www.ungdata.no).<sup>(22)</sup> All data collection is conducted anonymously and web-based during school hours with the teacher present in the classroom. Data from the surveys carried out in 2017, 2018, and 2019 were used for the present study.

All 422 municipalities in Norway (2019) are invited to participate in the Ungdata survey. Participation is free of charge and on a volunteer basis. The municipalities are encouraged to perform the survey every three years in the schools of the municipalities. This is to ensure that all adolescents get to participate once both during lower (8<sup>th</sup> to 10<sup>th</sup> grade) and upper (11<sup>th</sup> to 13<sup>th</sup> grade) secondary school. The three-year interval is not a strict rule, which means that some municipalities participated twice and some all three years (2017-2019). In the present study, information from all municipalities was included regardless of how many years they participated. It is therefore possible that some adolescents responded twice or thrice. In total, we have data from 422 municipalities, 333 participated only once, 59 twice, and one municipality participated all three years. Fewer municipalities participated in the Ungdata survey in 2018, compared to 2017 and 2019 (Figure 1).

In Norway, children start school the year they turn six years old (grade 1) and stay in school until the age of 15-16 years (grade 10). Attending school is obligatory by law until the completion of grade 10 whereas attending subsequent grades is voluntary. National

1  
2  
3 statistics show that the majority of 16- to 18-year-old (93.4% in 2019) go on to attend upper  
4  
5 secondary schools.(23)  
6  
7

8  
9 A total of 297,102 adolescents from both lower and upper secondary schools participated in  
10  
11 the Ungdata surveys in 2017, 2018, and 2019. Of the participating adolescents, 278,891  
12  
13 answered the questions on ED consumption (response rate of 93.9%) and were included in  
14  
15 the analyses (Figure 1).  
16  
17

18  
19 In 2017, missing values for gender were 6.4% compared to less than 1% in 2018 and 2019.

20  
21 This is likely due to the order of questions in the electronic questionnaire, which led to  
22  
23 overlooking of the question regarding gender in the 2017 survey. This ordering of questions  
24  
25 was changed in 2018 and 2019 (personal correspondence with staff from Ungdata).  
26  
27

28  
29 The annual Ungdata Survey is approved by the Norwegian Centre for Research Data (NSD).

30  
31 Participants do not have unique identification numbers as data collection is done  
32  
33 anonymously and does not contain sensitive information. Therefore, no ethical approval was  
34  
35 needed. The study was funded by Innlandet Hospital Trust (project number: 150377).  
36  
37  
38

### 39 40 **Measures**

41  
42  
43 ED consumption was assessed with the question “How often do you usually drink energy  
44  
45 drinks (Red Bull, Battery, etc.)?” The participants could respond with one of seven  
46  
47 incremental options, ranging from “never” to “several times a day”. The response to this  
48  
49 question was used to categorize adolescents into the following two groups subsequently  
50  
51 used as outcome variables: ED consumers (ED  $\geq$  once a week) and high ED consumers (ED  $\geq$  4  
52  
53 times a week). The ED consumers were compared to never ED consumers, and the high ED  
54  
55 consumers were compared to the rest (all other frequency of ED consumption including non-  
56  
57  
58 ED).  
59  
60

1  
2  
3 Leisure screen time was assessed using the question “Outside school, how much time do you  
4 normally spend on activities that involve looking at a screen (TV, computer, tablet, mobile  
5 phone) each day?” with options on a seven-point incremental scale ranging from “no time”  
6 to “more than six hours”. The first three options of the variable leisure screen-time were  
7 merged into one response of “less than two hours” due to the relatively low number of  
8 respondents in these categories.  
9

10  
11  
12  
13  
14  
15  
16  
17  
18 Physical activity was assessed by the question “How often do you perform physical activity  
19 which gets you out of breath or makes you sweaty?” with options on a six-point incremental  
20 scale ranging from “never” to “at least five times a week”.  
21  
22  
23

24  
25  
26  
27  
28  
29  
30  
31  
32  
33  
34  
35  
36  
37  
38  
39  
40  
41  
42  
43  
44  
45  
46  
47  
48  
49  
50  
51  
52  
53  
54  
55  
56  
57  
58  
59  
60  
SES was assessed according to a five-point scale which again was based on a compound  
score from three different dimensions.(24, 25) These dimensions were: parental education,  
“culture capital” at home based on the question “how many books do you think there are in  
your home?”, and the third dimension used four questions from the Family Affluence Scale  
(FAS II). FAS II contains questions regarding the number of cars in the family, whether the  
participant has her/his own bedroom, whether the participant has been on vacation, and the  
number of computers or tablets in the house. The answers were assigned different points  
that were subsequently used to calculate a total score distributed into five equally sized  
groups. Group 1 refers to the lowest SES-score and group 5 to the highest.

For this study, we used the official Norwegian centrality index to define residency. According  
to Statistics Norway, centrality is a term used to describe an index that is divided into 6  
groups. Group 1 contains the most central municipalities (highest index) and group 6 the  
least central (lowest index).(26) The calculation of the index is based on travel time to  
workplaces and service functions from all populated basic units. Residency for each

1  
2  
3 individual is based on where the adolescent attends school and is not per se the place of  
4  
5 living.  
6  
7

8 Further details on variables and answer options are given in Table 1.  
9  
10

## 11 **Statistical analyses**

12  
13  
14 The association between the outcome variables (any and high ED consumption) and the  
15 independent variables were estimated in multivariable Poisson regression models. These  
16  
17 models allowed us to estimate the risk ratios (RR) between the categories of the  
18 independent variables.(27-29) We used the sandwich estimation method to generate robust  
19  
20 standard errors.(27) We also included interaction terms between year and gender to  
21  
22 estimate the extent to which these variables modified each other's association with the  
23  
24 outcomes. In other words, we assessed if the association between gender and energy drinks  
25  
26 differed by year and the extent to which the association between year and the consumption  
27  
28 of ED differed by gender. The independent variables in the statistical models were decided *a*  
29  
30 *priori* and consisted of: gender, year, grade, residency, SES, frequency of physical activity and  
31  
32 leisure screen time. The analyses were performed with and without adjusting the standard  
33  
34 errors for clustering within municipalities.  
35  
36  
37  
38  
39  
40  
41  
42  
43  
44

45 The interactions terms between gender and year were estimated both on an additive and a  
46  
47 multiplicative scale using generalized linear models with identity and log link,  
48  
49 respectively.(30) In these models we estimated the significance of the interaction terms  
50  
51 using likelihood ratio tests. STATA version 15.1 (College Station, Texas) was used for all  
52  
53 statistical analysis.(31)  
54  
55

## 56 **Patient and public involvement**

57  
58  
59  
60

1  
2  
3  
4  
5  
6  
7  
8  
9  
10  
11  
12  
13  
14  
15  
16  
17  
18  
19  
20  
21  
22  
23  
24  
25  
26  
27  
28  
29  
30  
31  
32  
33  
34  
35  
36  
37  
38  
39  
40  
41  
42  
43  
44  
45  
46  
47  
48  
49  
50  
51  
52  
53  
54  
55  
56  
57  
58  
59  
60

There were no patients involved in the study.

For peer review only

## RESULTS

In total, 278,891 adolescents who participated in Ungdata answered the question about ED use and were included for further analyses. Most of the adolescents (57.5%) attended lower secondary school (Table 1). Grade thirteen was the least represented grade in the sample, which is in line with previous findings from the Ungdata survey.<sup>(24)</sup>

Most of the participants lived in municipalities with the centrality index two and three. The distribution seen in Table 1 is comparable to the overall distribution of the centrality index in Norway.<sup>(32)</sup> A lesser percentage in level six was expected, as fewer people are living in these areas.

*Table 1. Baseline Characteristics of Adolescents participating in the Ungdata surveys in 2017, 2018 and 2019.*

| VARIABLE               | TOTAL (%)      | 2017 (%)      | 2018 (%)      | 2019 (%)      |
|------------------------|----------------|---------------|---------------|---------------|
| <b>N</b>               | 278,891        | 101,997       | 66,017        | 110,877       |
| <b>SCHOOL LEVEL</b>    |                |               |               |               |
| <i>LOWER SECONDARY</i> | 160,352 (57.5) | 61,768 (60.6) | 38,256 (57.9) | 60,328 (54.4) |
| <i>UPPER SECONDARY</i> | 118,539 (42.5) | 40,229 (39.4) | 27,761 (42.1) | 50,549 (45.6) |
| <b>GRADE</b>           |                |               |               |               |
| <i>8</i>               | 52,984 (19.0)  | 20,381 (20.0) | 12,695 (19.2) | 19,908 (18.0) |
| <i>9</i>               | 51,393 (18.4)  | 19,514 (19.1) | 12,558 (19.0) | 19,321 (17.4) |
| <i>10</i>              | 50,547 (18.1)  | 19,632 (19.2) | 11,687 (17.7) | 19,228 (17.3) |
| <i>11</i>              | 50,972 (18.3)  | 18,580 (18.2) | 11,190 (16.9) | 21,202 (19.1) |
| <i>12</i>              | 40,391 (14.5)  | 12,824 (12.6) | 9360 (14.2)   | 18,207 (16.4) |
| <i>13</i>              | 26,351 (9.5)   | 8632 (8.5)    | 7091 (10.7)   | 10,628 (9.6)  |
| <i>MISSING</i>         | 6253 (2.2)     | 2434 (2.4)    | 1436 (2.2)    | 2383 (2.2)    |
| <b>GENDER</b>          |                |               |               |               |
| <i>FEMALE</i>          | 138,218 (49.6) | 47,218 (46.3) | 31,802 (48.2) | 54,020 (48.7) |
| <i>MALE</i>            | 133,040 (47.7) | 48,254 (47.3) | 33,908 (51.4) | 56,056 (50.6) |



|                                       |                |               |               |               |
|---------------------------------------|----------------|---------------|---------------|---------------|
| <i>MISSING</i>                        | 7633 (2.7)     | 6525 (6.4)    | 307 (0.5)     | 801 (0.7)     |
| <b>RESIDENCY</b>                      |                |               |               |               |
| <i>1</i>                              | 56,012 (20.2)  | 14,909 (14.7) | 22,358 (34.0) | 18,745 (16.9) |
| <i>2</i>                              | 63,413 (22.8)  | 30,793 (30.5) | 5601 (8.5)    | 27,019 (24.4) |
| <i>3</i>                              | 74,853 (26.9)  | 23,190 (22.9) | 16,117 (25.5) | 35,546 (32.1) |
| <i>4</i>                              | 46,826 (16.9)  | 16,688 (16.5) | 11,286 (17.1) | 18,852 (17.0) |
| <i>5</i>                              | 27,900 (10.0)  | 12,358 (12.2) | 7609 (11.6)   | 7933 (7.1)    |
| <i>6</i>                              | 8847 (3.2)     | 3195 (3.2)    | 2870 (4.4)    | 2782 (2.5)    |
| <b>FREQUENCY OF PHYSICAL ACTIVITY</b> |                |               |               |               |
| <i>NEVER</i>                          | 4518 (1.6)     | 1374 (1.3)    | 1218 (1.8)    | 1926 (1.7)    |
| <i>SELDOM</i>                         | 19,642 (7.0)   | 6314 (6.2)    | 4997 (7.6)    | 8331 (7.5)    |
| <i>1-2 TIMES A MONTH</i>              | 18,007 (6.5)   | 6105 (6.0)    | 4709 (7.1)    | 7193 (6.5)    |
| <i>1-2 TIMES A WEEK</i>               | 75,687 (27.1)  | 26,901 (26.4) | 18,484 (28.0) | 30,302 (27.3) |
| <i>3-4 TIMES A WEEK</i>               | 89,537 (32.1)  | 33,164 (32.5) | 20,458 (31.0) | 35,915 (32.4) |
| <i>≥ 5 TIMES A WEEK</i>               | 65,897 (23.6)  | 25,472 (25.0) | 14,402 (21.8) | 26,023 (23.5) |
| <i>MISSING</i>                        | 5603 (2.0)     | 2667 (2.6)    | 1749 (2.7)    | 1187 (1.1)    |
| <b>LEISURE SCREEN TIME</b>            |                |               |               |               |
| <i>≤ 2 HOURS DAILY</i>                | 43,234 (15.5)  | 17,734 (17.4) | 10,355 (15.7) | 15,145 (13.7) |
| <i>2-3 HOURS DAILY</i>                | 60,567 (21.7)  | 22,786 (22.3) | 14,284 (21.6) | 23,497 (21.2) |
| <i>3-4 HOURS DAILY</i>                | 75,781 (27.2)  | 27,296 (26.8) | 17,654 (26.7) | 30,831 (27.8) |
| <i>4-6 HOURS DAILY</i>                | 59,250 (21.2)  | 20,379 (20.0) | 13,878 (21.0) | 24,993 (22.5) |
| <i>≥ 6 HOURS DAILY</i>                | 36,168 (13.0)  | 12,563 (12.3) | 8873 (13.4)   | 14,732 (13.3) |
| <i>MISSING</i>                        | 3891 (1.4)     | 1239 (1.2)    | 973 (1.5)     | 1679 (1.5)    |
| <b>ENERGY DRINKS CONSUMPTION</b>      |                |               |               |               |
| <i>NEVER</i>                          | 128,365 (46.0) | 46,782 (45.9) | 31,055 (47.0) | 50,528 (45.6) |
| <i>&lt; ONCE A WEEK</i>               | 71,200 (25.5)  | 27,530 (27.0) | 16,594 (25.1) | 27,076 (24.4) |
| <i>ONCE A WEEK</i>                    | 29,653 (10.6)  | 10,936 (10.7) | 6784 (10.3)   | 11,933 (10.8) |
| <i>2-3 TIMES A WEEK</i>               | 28,974 (10.4)  | 10,065 (9.9)  | 6595 (10.0)   | 12,314 (11.1) |
| <i>4-6 TIMES A WEEK</i>               | 12,310 (4.4)   | 4038 (4.0)    | 2843 (4.3)    | 5429 (4.9)    |

|                     |            |            |            |            |
|---------------------|------------|------------|------------|------------|
| EVERY DAY           | 4080 (1.5) | 1250 (1.2) | 1005 (1.5) | 1825 (1.6) |
| SEVERAL TIMES A DAY | 4309 (1.5) | 1396 (1.4) | 1141 (1.7) | 1772 (1.6) |

Between 20-30% of the participants reported performing some kind of physical activity where they get sweaty either 1-2, 3-4, or more than 5 times a week, while less than 10% reported 1-2 times a month or less. In addition, more than 10% spent 6 hours or more looking at a screen. Overall, 46% of the participants had never consumed ED and 7.4% had consumed ED more than 4 times a week.

Over the three years, there was a small decrease in the percentage of boys consuming ED from 67.3% (CI: 66.9-67.7) in 2017 to 65.7% (CI: 65.3-66.1) in 2019. Among girls, a small increase was found from 40.8% (CI: 40.4-41.3) in 2017 to 43.6% (CI: 43.1-44.0) in 2019 (Figure 2). However, high ED consumers increased among both boys and girls (Figure 3). In 2017, 9.8% (CI: 9.5-10.0) of the boys and 3.3% (CI: 3.1-3.4) of the girls reported ED consumption in the range of high consumers, while these percentages increased to 11.5% (CI: 11.2-11.7) in boys and 4.9% (CI: 4.7-5.1) in girls in 2019.

Table 2 shows the annual increase in high ED consumption among both boys and girls. The proportion of female high ED consumers increased by an average of 23% per year. That is, the proportion of female high consumers increased by 24% (RR; CI) (1.24; 1.15, 1.34) from 2017 to 2018, and by 46% (1.46; 1.37, 1.55) from 2017 to 2019. There was also an increase in the proportion of high consumers of ED in boys, however, this increase was lower at 12% from 2017 to 2019. On a multiplicative scale, the interaction terms between gender and year was statistically significant (Table 2). However, on an additive scale there was no interaction found according to the generalized linear models as the difference in percentage points was almost identical (1.7 in boys and 1.6 in girls). Adjusting for clustering of municipalities only

1  
2  
3 showed marginal alteration of the standard errors and CIs. Table 2 demonstrates the results  
4  
5 from the Poisson regression models.  
6  
7  
8  
9  
10  
11  
12  
13  
14  
15  
16  
17  
18  
19  
20  
21  
22  
23  
24  
25  
26  
27  
28  
29  
30  
31  
32  
33  
34  
35  
36  
37  
38  
39  
40  
41  
42  
43  
44  
45  
46  
47  
48  
49  
50  
51  
52  
53  
54  
55  
56  
57  
58  
59  
60

For peer review only

Table 2. Determinants for being energy drink consumers (any ED or high ED) in Norwegian adolescents.

| VARIABLE                                                                       | TOTAL SAMPLE |        |      | ED CONSUMERS |            | HIGH ED CONSUMERS |      |      |            |
|--------------------------------------------------------------------------------|--------------|--------|------|--------------|------------|-------------------|------|------|------------|
|                                                                                | n            | n      | %    | RR           | 95% CI     | n                 | %    | RR   | 95% CI     |
| <b>INTERACTION TERMS</b>                                                       |              |        |      | 1            |            |                   |      | 1    |            |
| <i>INTERACTION GENDER AND YEAR - 2018</i>                                      |              |        |      | 0.99         | 0.96, 1.02 |                   |      | 0.89 | 0.81, 0.97 |
| <i>INTERACTION GENDER AND YEAR - 2019</i>                                      |              |        |      | 0.91         | 0.89, 0.94 |                   |      | 0.77 | 0.71, 0.83 |
| <b>SUBGROUPS</b>                                                               |              |        |      |              |            |                   |      |      |            |
| <b>YEAR</b>                                                                    |              |        |      |              |            |                   |      |      |            |
| <i>2017 FEMALE</i>                                                             | 48,254       | 19,700 | 40.8 | 1            |            | 1571              | 3.3  | 1    |            |
| <i>2018 FEMALE</i>                                                             | 33,908       | 13,702 | 40.4 | 0.98         | 0.96, 1.01 | 1410              | 4.2  | 1.24 | 1.15, 1.34 |
| <i>2019 FEMALE</i>                                                             | 56,056       | 24,414 | 43.5 | 1.05         | 1.03, 1.07 | 2759              | 4.9  | 1.46 | 1.37, 1.55 |
| <i>2017 MALE</i>                                                               | 47,218       | 31,785 | 67.3 | 1            |            | 4620              | 9.8  | 1    |            |
| <i>2018 MALE</i>                                                               | 31,802       | 21,097 | 66.3 | 0.98         | 0.96, 1.00 | 3554              | 11.2 | 1.10 | 1.05, 1.16 |
| <i>2019 MALE</i>                                                               | 54,020       | 35,491 | 65.7 | 0.96         | 0.95, 0.98 | 6190              | 11.5 | 1.12 | 1.07, 1.16 |
| <b>ASSOCIATION BETWEEN GENDER AND ED PER YEAR (FEMALES IN REFERENCE GROUP)</b> |              |        |      |              |            |                   |      |      |            |

|                             |        |        |      |      |            |      |      |                 |
|-----------------------------|--------|--------|------|------|------------|------|------|-----------------|
| <i>MALE 2017</i>            |        |        |      | 1.63 | 1.61, 1.66 |      | 2.79 | 2.63, 2.97      |
| <i>MALE 2018</i>            |        |        |      | 1.62 | 1.59, 1.66 |      | 2.48 | 2.33, 2.65      |
| <i>MALE 2019</i>            |        |        |      | 1.49 | 1.47, 1.52 |      | 2.14 | 2.04, 2.24      |
| <b>GRADE</b>                |        |        |      |      |            |      |      |                 |
| 8                           | 52,984 | 22,741 | 42.9 | 1    |            | 2533 | 4.8  | 1               |
| 9                           | 51,393 | 26,914 | 52.4 | 1.20 | 1.18, 1.22 | 3224 | 6.3  | 1.25 1.18, 1.32 |
| 10                          | 50,547 | 28,215 | 55.8 | 1.26 | 1.24, 1.29 | 3654 | 7.2  | 1.39 1.32, 1.47 |
| 11                          | 50,972 | 30,154 | 59.2 | 1.34 | 1.32, 1.36 | 4756 | 9.3  | 1.78 1.70, 1.88 |
| 12                          | 40,391 | 23,925 | 59.2 | 1.34 | 1.32, 1.37 | 3886 | 9.6  | 1.84 1.75, 1.94 |
| 13                          | 26,351 | 14,864 | 56.4 | 1.32 | 1.29, 1.35 | 2154 | 8.2  | 1.73 1.63, 1.82 |
| <b>RESIDENCY</b>            |        |        |      |      |            |      |      |                 |
| 1                           | 56,012 | 26,965 | 48.1 | 1    |            | 3254 | 5.8  | 1               |
| 2                           | 63,413 | 32,609 | 51.4 | 1.06 | 1.04, 1.08 | 4355 | 6.9  | 1.20 1.14, 1.26 |
| 3                           | 74,853 | 40,723 | 54.4 | 1.11 | 1.09, 1.13 | 5738 | 7.7  | 1.27 1.22, 1.33 |
| 4                           | 46,826 | 27,433 | 58.6 | 1.20 | 1.18, 1.22 | 4077 | 8.7  | 1.46 1.39, 1.53 |
| 5                           | 27,900 | 16,895 | 60.6 | 1.25 | 1.22, 1.28 | 2467 | 8.8  | 1.54 1.46, 1.63 |
| 6                           | 8847   | 5329   | 60.2 | 1.24 | 1.19, 1.28 | 750  | 8.5  | 1.58 1.43, 1.75 |
| <b>SOCIOECONOMIC STATUS</b> |        |        |      |      |            |      |      |                 |
| 5 HIGHEST                   | 56,418 | 28,084 | 49.8 | 1    |            | 3133 | 5.6  | 1               |

|                            |        |        |      |      |            |      |      |      |            |
|----------------------------|--------|--------|------|------|------------|------|------|------|------------|
| 4                          | 55,641 | 29,692 | 53.4 | 1.03 | 1.02, 1.05 | 3665 | 6.6  | 1.11 | 1.05, 1.16 |
| 3                          | 55,935 | 30,532 | 54.6 | 1.05 | 1.04, 1.07 | 4199 | 7.5  | 1.21 | 1.15, 1.27 |
| 2                          | 55,947 | 31,269 | 55.9 | 1.07 | 1.05, 1.08 | 4542 | 8.1  | 1.28 | 1.22, 1.35 |
| 1 <i>LOWEST</i>            | 54,950 | 30,949 | 56.3 | 1.08 | 1.06, 1.09 | 5160 | 9.4  | 1.43 | 1.36, 1.50 |
| <b>PHYSICAL ACTIVITY</b>   |        |        |      |      |            |      |      |      |            |
| <i>NEVER</i>               | 4518   | 2481   | 54.9 | 1    |            | 782  | 17.3 | 1    |            |
| <i>SELDOM</i>              | 19,642 | 11,086 | 56.4 | 1.05 | 1.00, 1.09 | 2002 | 10.2 | 0.65 | 0.59, 0.70 |
| <i>1-2 TIMES A MONTH</i>   | 18,007 | 9903   | 55.0 | 1.04 | 1.00, 1.09 | 1357 | 7.5  | 0.53 | 0.48, 0.58 |
| <i>1-2 TIMES A WEEK</i>    | 75,687 | 40,581 | 53.6 | 1.02 | 0.97, 1.06 | 5058 | 6.7  | 0.50 | 0.46, 0.54 |
| <i>3-4 TIMES A WEEK</i>    | 89,537 | 47,874 | 53.5 | 1.03 | 0.99, 1.07 | 5614 | 6.3  | 0.52 | 0.48, 0.58 |
| <i>≥ 5 TIMES A WEEK</i>    | 65,897 | 35,312 | 53.6 | 1.00 | 0.96, 1.04 | 5173 | 7.9  | 0.62 | 0.57, 0.67 |
| <b>LEISURE SCREEN TIME</b> |        |        |      |      |            |      |      |      |            |
| <i>≤ 2 HOURS DAILY</i>     | 43,234 | 18,797 | 43.5 | 1    |            | 1978 | 4.6  | 1    |            |
| <i>2-3 HOURS DAILY</i>     | 60,567 | 28,922 | 47.8 | 1.10 | 0.96, 1.04 | 2659 | 4.4  | 1.0  | 0.94, 1.07 |
| <i>3-4 HOURS DAILY</i>     | 75,781 | 40,778 | 53.8 | 1.22 | 1.20, 1.24 | 4514 | 6.0  | 1.33 | 1.25, 1.40 |
| <i>4-6 HOURS DAILY</i>     | 59,250 | 35,462 | 59.9 | 1.32 | 1.30, 1.34 | 4950 | 8.4  | 1.79 | 1.69, 1.89 |
| <i>≥ 6 HOURS DAILY</i>     | 36,168 | 24,214 | 66.9 | 1.42 | 1.39, 1.45 | 6026 | 16.7 | 3.16 | 2.99, 3.33 |

ED: Energy drink; RR: Relative Risk; CI: Confidence Interval; <sup>a</sup> Modified Poisson regression with robust variance estimation; <sup>b</sup> Estimates are statistically significant if their CIs do not include 1.0. Walds test shows statistically significant p-values at p<0.05. Loglikelihood ratio test of complete interaction term was significant at p<0.01.

1  
2  
3 The association between ED consumption and social determinants (Table 2) showed that the  
4 largest proportion of high ED consumers was found in participants living in centrality index 6  
5 (least central residency). Furthermore, we found a larger proportion of high ED consumers  
6 with decreasing SES. The same association was found when looking at the any ED  
7 consumption group, although differences were less pronounced. There was a non-linear  
8 relation between high ED consumption and physically active. However, this was not  
9 observed for the any ED consumption group. Regarding both the participants who consumed  
10 any ED as well as the high consumers, the proportions increased with increasing leisure  
11 screen time. The proportion of high ED consumers that spent more than 6 hours looking at a  
12 screen outside school hours was three times higher than the high ED consumers that spent  
13 less than 2 hours looking at a screen.  
14  
15  
16  
17  
18  
19  
20  
21  
22  
23  
24  
25  
26  
27  
28  
29  
30  
31  
32  
33  
34  
35  
36  
37  
38  
39  
40  
41  
42  
43  
44  
45  
46  
47  
48  
49  
50  
51  
52  
53  
54  
55  
56  
57  
58  
59  
60

## DISCUSSION

We have described social determinants and development in energy drink consumption among Norwegian adolescents between 2017 and 2019. We found an increase in the percentage of both boys and girls being high ED consumers and a change in ED consumption according to time. We found that in total, over the three years, 4.2% of the girls and 10.8% of the boys were high ED consumers. There was also an annual increase in the proportion of high consumers that was most pronounced for girls increasing from 3.3% in 2017 to 4.9% in 2019. Moreover, we found that more than half of the adolescents participating in the study had consumed any ED during these three years. The increase in high ED consumption was expected as sales in ED in Norway have increased. However, adolescents are most likely not the only group consuming increasing amounts of ED. It is plausible that other groups in the population follow the same trend in ED consumption.

High ED consumption was positively associated with the male gender, lower SES, rural living, excessive screen watching, physical inactivity, and being very physically active. The combination of either low or high physical activity and high leisure screen-time as predictors for ED consumption was also found in other studies from Saudi Arabia, Canada, and the U.S.(3, 18, 33-35) Al-Hazza et. al proposed that the reason why both low and high physical activity and high leisure screen-time was observed, is due to how ED are being marketed.(33)

As mentioned above, ED are often marketed as boosters of an active lifestyle and higher levels of performance. Regarding the gender difference in high ED consumption, one could hypothesize that because of the marketing trends of ED focusing on masculinity boys are more likely influenced by this marketing strategy.(7) According to the study by Emond et. al



1  
2  
3 on ED advertisement, ED was primarily advertised on channels with adolescents as their  
4  
5 base audience.(5) Based on this, one could imagine that increased screen time and thereby  
6  
7 increased exposure to ED advertising would lead to higher ED consumption rates. In  
8  
9 addition, Hammond et. al. found that TV was the main common source of marketing of ED to  
10  
11 adolescents next to marketing in grocery stores.(36) Our results also suggest that  
12  
13 adolescents who spend much of their spare time watching screens are those who consume  
14  
15 most ED.  
16  
17  
18  
19  
20

21 Our results show that even though boys still are the highest consumers of ED, the increase in  
22  
23 the proportion of female high consumers was larger, on a multiplicative scale but not an  
24  
25 additive scale, compared to males over the three years. The increase was 1.7 percentage  
26  
27 points for boys (9.8-11.5%) and 1.6 for girls (3.3-4.9%) from 2017 until 2019. Based on this  
28  
29 finding it could be speculated that girls are becoming more exposed and perhaps more  
30  
31 susceptible to ED marketing than before.  
32  
33  
34  
35

### 36 **Limitations and strengths**

37  
38  
39 A limitation of the study is that we were not able to take the regional differences in  
40  
41 participation of schools each year into account. This might have affected the observed  
42  
43 development of ED consumption seen over the three years. However, the breadth of the  
44  
45 municipalities participating in the Ungdata study in 2017, 2018 and 2019 with an even  
46  
47 distribution of smaller and larger communities spread out across Norway makes the sample  
48  
49 sufficiently large and wide-reaching. Moreover, the participants are not completely selected  
50  
51 at random as only municipalities who wanted to participate in the Ungdata survey were  
52  
53 included in the study. In addition, the participating schools within these municipalities were  
54  
55 not selected completely at random. The lower secondary schools are run by the  
56  
57  
58  
59  
60

1  
2  
3 municipalities while the upper secondary schools are organized according to regional  
4  
5 districts, therefore the schools have different catchment areas when it comes to children  
6  
7 attending the schools.  
8  
9

10  
11 Other limitations common to such surveys are that the study relies on self-reported ED  
12  
13 consumption which can be susceptible to both recall bias and social desirability bias.(37)  
14

15  
16 Moreover, only children who attended school on the day of the survey answered the  
17  
18 questionnaire. Adolescents who were absent or had dropped out were therefore not  
19  
20 included in the study, which might have affected the results. Finally, some adolescents might  
21  
22 have participated more than once, yet no adjustment for lack of independence between  
23  
24 these observations was possible.  
25  
26

27  
28 The major strength of this study is the large sample included, with close to 300,000  
29  
30 adolescents answering the questionnaire and a response from 74.4% of the total eligible  
31  
32 students in this time period.  
33  
34

35  
36 This study examined development and social determinants in ED consumption among  
37  
38 Norwegian adolescents in 2017, 2018 and 2019 according to age, gender, SES, residency,  
39  
40 physical activity, and leisure screen-time. The main finding of an increasing proportion of  
41  
42 female high ED consumers is of special interest as it highlights the fact that despite male  
43  
44 high ED consumers still being the gender consuming most ED, females high ED consumers  
45  
46 are catching up. This is an important finding to consider in future research which could focus  
47  
48 on possible differences between the consumers of the specific types of ED, but also possible  
49  
50 the reasons why they drink ED. In addition, it is important to investigate the potential long-  
51  
52 term effects of ED consumption among adolescents.  
53  
54  
55  
56  
57  
58  
59  
60

**CONCLUSION**

The increase in ED sales in Norway is alarming. ED consumption is increasing among female adolescents, especially high ED consumption. Yet, the mechanism or reason behind this increase remains unclear. As a result, future research should consider gender-related differences when studying various aspects of ED consumption. In addition, adolescents are most likely not the only group contributing to the large increase in ED sales in Norway.

For peer review only

**REFERENCES**

1. Drikkeglede.no. Salgstall Energidrikker [updated 13-05-2020. Available from: [https://www.drikkeglede.no/tall\\_og\\_fakta/?PT\\_Radnr=5&mnd=3&aar=2020](https://www.drikkeglede.no/tall_og_fakta/?PT_Radnr=5&mnd=3&aar=2020).
2. Zucconi S., Volpato C., Adinolfi F., et al. Gathering consumption data on specific consumer groups of energy drinks. 2013;EN-394:190.
3. Visram S, Cheetham M, Riby DM, et al. Consumption of energy drinks by children and young people: a rapid review examining evidence of physical effects and consumer attitudes. BMJ Open. 2016;6(10):e010380.
4. VKM, Bruzell E, Carlsen MH, et al. Risk assessment of energy drinks and caffeine. Scientific opinion of the Panel of Food Additives, Flavourings, Processing Aids, Materials in Contact with Food, and Cosmetics of the Norwegian Scientific Committee for Food and Environment., Norwegian Scientific Committee for Food and Environment (VKM); 2019. Report No.: 01.
5. Emond JA, Sargent JD, Gilbert-Diamond D. Patterns of energy drink advertising over US television networks. Journal of nutrition education and behavior. 2015;47(2):120-6.e1.
6. Stacey N, van Walbeek C, Maboshe M, et al. Energy drink consumption and marketing in South Africa. Preventive medicine. 2017;105s:S32-s6.
7. Wiggers D, Asbridge M, Baskerville NB, et al. Exposure to Caffeinated Energy Drink Marketing and Educational Messages among Youth and Young Adults in Canada. International journal of environmental research and public health. 2019;16(4).
8. Grasser EK, Yepuri G, Dulloo AG, et al. Cardio- and cerebrovascular responses to the energy drink Red Bull in young adults: a randomized cross-over study. European journal of nutrition. 2014;53(7):1561-71.

- 1  
2  
3 9. Dawodu A, Cleaver K. Behavioural correlates of energy drink consumption among  
4 adolescents: A review of the literature. *Journal of Child Health Care*. 2017;21(4):446-62.  
5  
6  
7
- 8 10. Brand S, Kirov R. Sleep and its importance in adolescence and in common adolescent  
9 somatic and psychiatric conditions. *International journal of general medicine*. 2011;4:425-42.  
10  
11  
12
- 13 11. Kronholm E, Puusniekka R, Jokela J, et al. Trends in self-reported sleep problems,  
14 tiredness and related school performance among Finnish adolescents from 1984 to 2011.  
15 *Journal of sleep research*. 2015;24(1):3-10.  
16  
17  
18
- 19 12. Harris JL, Munsell CR. Energy drinks and adolescents: what's the harm? *Nutr Rev*.  
20 2015;73(4):247-57.  
21  
22  
23
- 24 13. Iversen KL, Arnesen E, Meltzer HM, et al. Children and adolescents need protection  
25 against energy drinks. *Tidsskrift for den Norske lægeforening : tidsskrift for praktisk medicin,*  
26 *ny række*. 2018;138(14).  
27  
28  
29
- 30 14. Keast RS, Swinburn BA, Sayompark D, et al. Caffeine increases sugar-sweetened  
31 beverage consumption in a free-living population: a randomised controlled trial. *The British*  
32 *journal of nutrition*. 2015;113(2):366-71.  
33  
34  
35  
36  
37  
38
- 39 15. Temple JL, Dewey AM, Briatico LN. Effects of acute caffeine administration on  
40 adolescents. *Experimental and clinical psychopharmacology*. 2010;18(6):510-20.  
41  
42  
43
- 44 16. Breda JJ, Whiting SH, Encarnacao R, et al. Energy drink consumption in europe: a  
45 review of the risks, adverse health effects, and policy options to respond. *Frontiers in public*  
46 *health*. 2014;2:134.  
47  
48  
49
- 50 17. Mattilsynet. Energidrikker og koffein. Mattilsynets anbefaling til Helse- og  
51 omsorgsdepartementet. 2019.  
52  
53  
54  
55  
56  
57  
58  
59  
60

- 1  
2  
3 18. Azagba S, Langille D, Asbridge M. An emerging adolescent health risk: caffeinated  
4 energy drink consumption patterns among high school students. Preventive medicine.  
5 2014;62:54-9.  
6  
7  
8  
9
- 10 19. Sampasa-Kanyinga H, Masengo L, Hamilton H, et al. Energy Drink Consumption and  
11 Substance Use among Middle and High School Students. International journal of  
12 environmental research and public health. 2020;17(9).  
13  
14  
15  
16
- 17 20. Degirmenci N, Fossum IN, Strand TA, et al. Consumption of energy drinks among  
18 adolescents in Norway: a cross-sectional study. BMC public health. 2018;18(1):1391.  
19  
20  
21
- 22 21. Committee on Nutrition and the Council on Sports Medicine and Fitness. Sports  
23 drinks and energy drinks for children and adolescents: are they appropriate? Pediatrics.  
24 2011;127(6):1182-9.  
25  
26  
27
- 28 22. Ungdata. About Ungdata 2020 [Available from: <https://www.ungdata.no/english/>.  
29  
30  
31
- 32 23. Keute A-L, Bratholmen NVL. Upper secondary education (Videregående opplæring og  
33 annen videregående utdanning) 2020 [updated 27-02-2020. Available from:  
34 <https://www.ssb.no/vgu>.  
35  
36  
37  
38
- 39 24. Bakken A. Ungdata. Nasjonale resultater 2019.: NOVA, OsloMet; 2019. Report No.:  
40 NOVA Rapport 9/19, .  
41  
42  
43
- 44 25. Frøyland L R. Ungdata - Lokale ungdomsundersøkelser. Dokumentasjon av variablene  
45 i spørreskjemaet. . NOVA; 2017.  
46  
47  
48  
49
- 50 26. Bloch VVH. Classification of centrality 2020 [Available from:  
51 <https://www.ssb.no/en/klass/klassifikasjoner/128/versjon/1292/om>.  
52  
53  
54
- 55 27. Zou G. A modified poisson regression approach to prospective studies with binary  
56 data. American journal of epidemiology. 2004;159(7):702-6.  
57  
58  
59  
60

- 1  
2  
3 28. Knol MJ, Le Cessie S, Algra A, et al. Overestimation of risk ratios by odds ratios in  
4 trials and cohort studies: alternatives to logistic regression. *CMAJ : Canadian Medical*  
5 *Association journal = journal de l'Association medicale canadienne.* 2012;184(8):895-9.  
6  
7  
8  
9  
10 29. Rojanaworarit C, Wong JJ. Investigating the Source of a Disease Outbreak Based on  
11 Risk Estimation: A Simulation Study Comparing Risk Estimates Obtained From Logistic and  
12 Poisson Regression Applied to a Dichotomous Outcome. *The Ochsner journal.*  
13 2019;19(3):220-6.  
14  
15  
16  
17  
18 30. Richardson DB, Kaufman JS. Estimation of the relative excess risk due to interaction  
19 and associated confidence bounds. *American journal of epidemiology.* 2009;169(6):756-60.  
20  
21  
22  
23  
24 31. StataCorp. *Stata Statistical Software: Release 15.* College Station, TX: StataCorp LLC;  
25 2017.  
26  
27  
28  
29 32. Høydahl E. *Ny sentralitetsindes for kommunene - New centrality index for the*  
30 *municipalities.* Statistics Norway; 2017.  
31  
32  
33  
34 33. Al-Hazzaa HM, Al-Sobayel HI, Abahussain NA, et al. Association of dietary habits with  
35 levels of physical activity and screen time among adolescents living in Saudi Arabia. *Journal*  
36 *of Human Nutrition & Dietetics.* 2014;27 Suppl 2:204-13.  
37  
38  
39  
40  
41 34. Larson N, DeWolfe J, Story M, et al. Adolescent Consumption of Sports and Energy  
42 Drinks: Linkages to Higher Physical Activity, Unhealthy Beverage Patterns, Cigarette Smoking,  
43 and Screen Media Use. *Journal of Nutrition Education & Behavior.* 2014;46(3):181-7.  
44  
45  
46  
47  
48 35. Nowak D, Jasionowski A. Analysis of the Consumption of Caffeinated Energy Drinks  
49 among Polish Adolescents. *International Journal of Environmental Research & Public Health*  
50 *[Electronic Resource].* 2015;12(7):7910-21.  
51  
52  
53  
54  
55 36. Hammond D, Reid JL. Exposure and perceptions of marketing for caffeinated energy  
56 drinks among young Canadians. *Public health nutrition.* 2018;21(3):535-42.  
57  
58  
59  
60

1  
2  
3 37. Rothman K. J. Epidemiology: An Introduction. 2nd ed. New York: Oxford University  
4 Press; 2002.  
5  
6  
7  
8  
9  
10  
11  
12  
13  
14  
15  
16  
17  
18  
19  
20  
21  
22  
23  
24  
25  
26  
27  
28  
29  
30  
31  
32  
33  
34  
35  
36  
37  
38  
39  
40  
41  
42  
43  
44  
45  
46  
47  
48  
49  
50  
51  
52  
53  
54  
55  
56  
57  
58  
59  
60

For peer review only



1  
2  
3 **Footnote page**  
4  
5

6 **Abbreviations**  
7  
8

9 ED = Energy Drinks  
10

11  
12 EFSA = European Food Safety Authority  
13

14  
15 FAS II = Family Affluence Scale II  
16

17  
18 NFSA = Norwegian Ministry of Health, the Norwegian Food Safety Authority  
19

20  
21 RR = Relative Risk  
22

23  
24 SES = Socio-Economic Status  
25

26  
27 VKM = Norwegian Scientific Committee for Food and Environment  
28

29  
30  
31 **Acknowledgements:** The authors would like to thank NOVA (The Norwegian Social Research)  
32  
33 for granting access to the data from the «Ungdata, 2010-2019» surveys used in the present  
34  
35 study.  
36

37  
38  
39 **Contributors:** S.K. and M. H.-A., conceptualized the study, acquired the data and drafted the  
40  
41 manuscript; S.K., T. A. S., and M. H.-A., analyzed the data; All authors (S.K, M. H.-A., T. A. S.,  
42  
43 and B. S. S) contributed to writing the manuscript; All authors have read and approved the  
44  
45 final manuscript.  
46

47  
48  
49 **Funding:** The study was funded by Innlandet Hospital Trust (project number: 150377).  
50

51  
52 **Ethical approval:** The annual Ungdata Survey is approved by the Norwegian Centre for  
53  
54 Research Data (NSD). Participants do not have unique identification numbers as data  
55  
56 collection is done anonymously and does not contain sensitive information. Therefore, no  
57  
58 ethical approval was needed.  
59  
60

1  
2  
3 **Patient and public involvement:** There was no patient or public involvement in study.  
4  
5

6 **Data availability statement:** The data supporting our study is available from the Norwegian  
7  
8 Centre for Research Data (NSD) and were used under license for the current study. The  
9  
10 Ungdata survey is funded by The Norwegian Directorate of Health. Anonymous data has  
11  
12 been made available for the authors by NOVA through NSD – the Norwegian Center for  
13  
14 Research Data. Neither NOVA, The Norwegian Directorate of Health or NSD are responsible  
15  
16 for the analyses or interpretation of the presented data.  
17  
18  
19

20  
21 **Competing interest:** None declared  
22  
23

## 24 **Figures**

25  
26 **Figure 1:** Overview of the Study Participants.  
27  
28

29  
30 **Figure 2:** Any ED Consumers per Year and Gender.  
31  
32

33  
34 **Figure 3:** High ED Consumers per Year and Gender.  
35  
36  
37  
38  
39  
40  
41  
42  
43  
44  
45  
46  
47  
48  
49  
50  
51  
52  
53  
54  
55  
56  
57  
58  
59  
60

1  
2  
3  
4  
5  
6  
7  
8  
9  
10  
11  
12  
13  
14  
15  
16  
17  
18  
19  
20  
21  
22  
23  
24  
25  
26  
27  
28  
29  
30  
31  
32  
33  
34  
35  
36  
37  
38  
39  
40  
41  
42  
43  
44  
45  
46

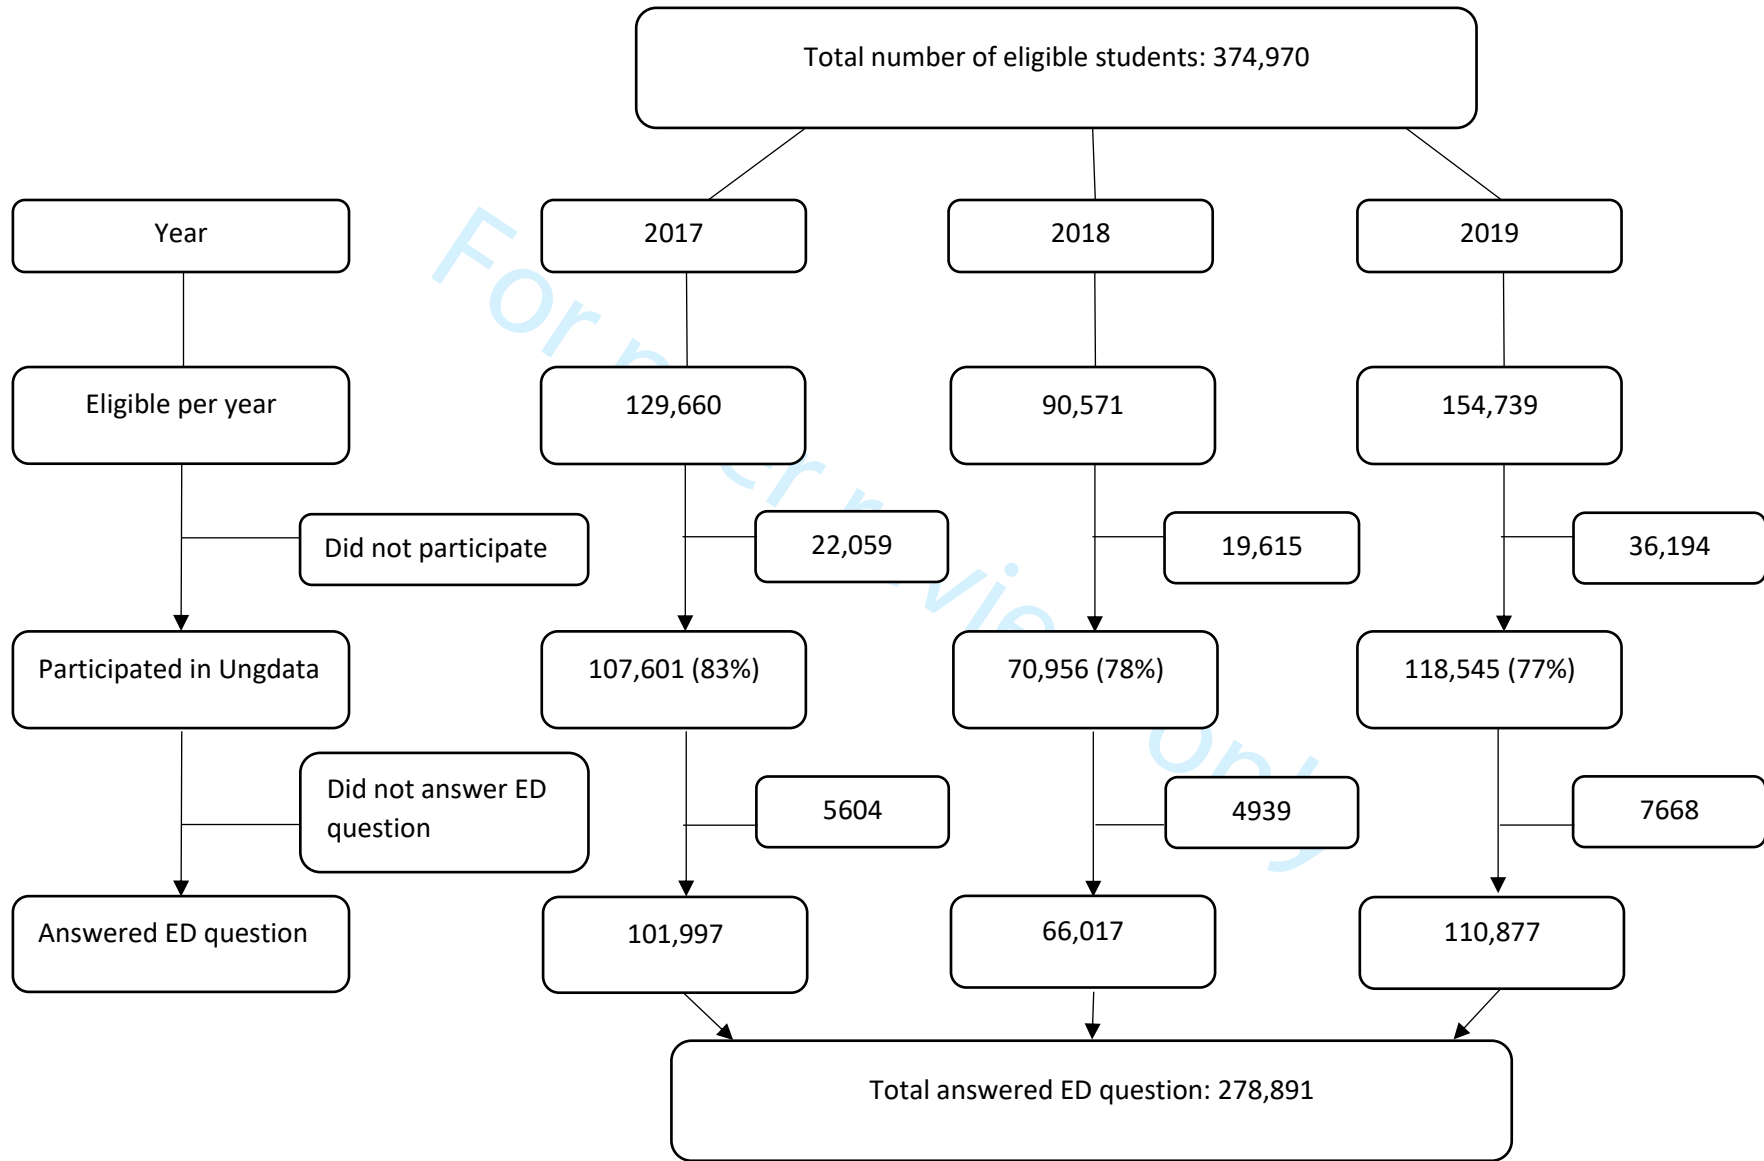

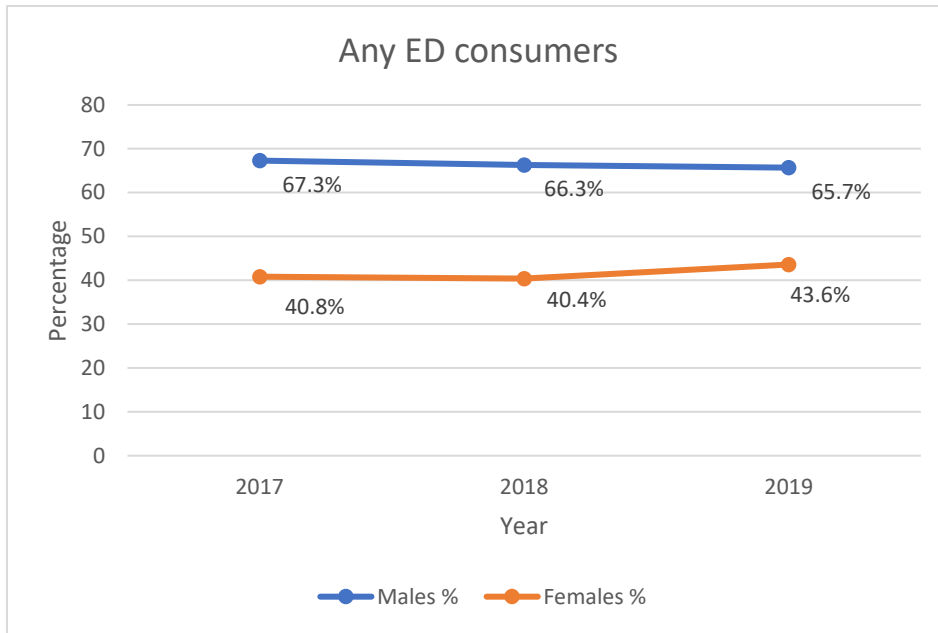

peer review only

1  
2  
3  
4  
5  
6  
7  
8  
9  
10  
11  
12  
13  
14  
15  
16  
17  
18  
19  
20  
21  
22  
23  
24  
25  
26  
27  
28  
29  
30  
31  
32  
33  
34  
35  
36  
37  
38  
39  
40  
41  
42  
43  
44  
45  
46  
47  
48  
49  
50  
51  
52  
53  
54  
55  
56  
57  
58  
59  
60

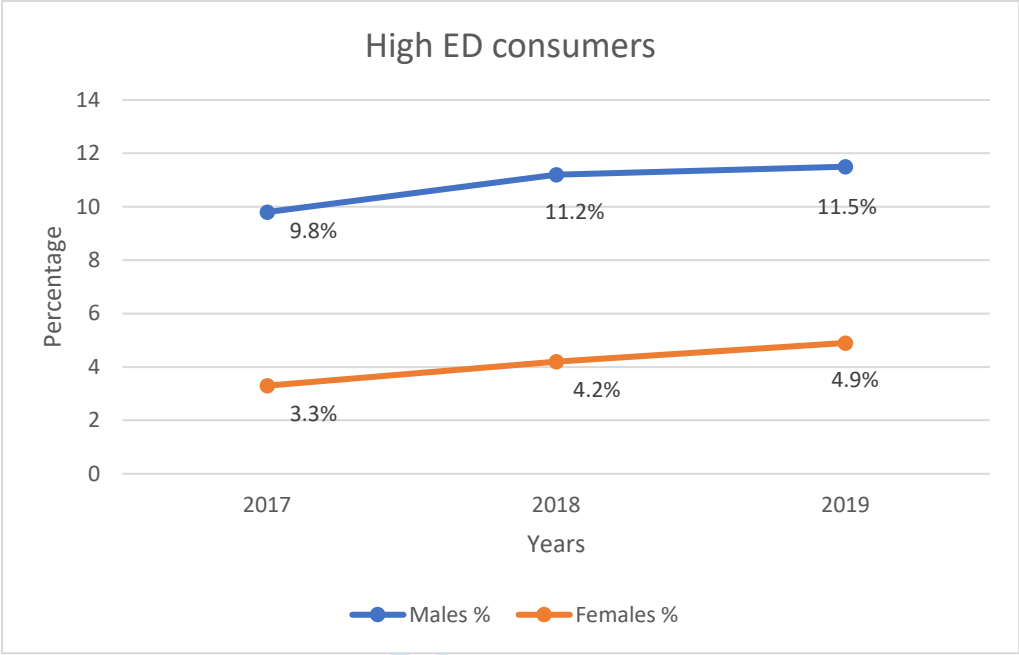

peer review only

STROBE Statement—Checklist of items that should be included in reports of *cross-sectional studies*

|                              | Item No | Recommendation                                                                                                                                                                                               | Page No |
|------------------------------|---------|--------------------------------------------------------------------------------------------------------------------------------------------------------------------------------------------------------------|---------|
| <b>Title and abstract</b>    | 1       | (a) Indicate the study's design with a commonly used term in the title or the abstract                                                                                                                       | 0       |
|                              |         | (b) Provide in the abstract an informative and balanced summary of what was done and what was found                                                                                                          | 0       |
| <b>Introduction</b>          |         |                                                                                                                                                                                                              |         |
| Background/rationale         | 2       | Explain the scientific background and rationale for the investigation being reported                                                                                                                         | 1-3     |
| Objectives                   | 3       | State specific objectives, including any prespecified hypotheses                                                                                                                                             | 3       |
| <b>Methods</b>               |         |                                                                                                                                                                                                              |         |
| Study design                 | 4       | Present key elements of study design early in the paper                                                                                                                                                      | 0+4     |
| Setting                      | 5       | Describe the setting, locations, and relevant dates, including periods of recruitment, exposure, follow-up, and data collection                                                                              | 0+4     |
| Participants                 | 6       | (a) Give the eligibility criteria, and the sources and methods of selection of participants                                                                                                                  | 5       |
| Variables                    | 7       | Clearly define all outcomes, exposures, predictors, potential confounders, and effect modifiers. Give diagnostic criteria, if applicable                                                                     | 5-7     |
| Data sources/<br>measurement | 8*      | For each variable of interest, give sources of data and details of methods of assessment (measurement). Describe comparability of assessment methods if there is more than one group                         | 5-7     |
| Bias                         | 9       | Describe any efforts to address potential sources of bias                                                                                                                                                    | 5       |
| Study size                   | 10      | Explain how the study size was arrived at                                                                                                                                                                    | 5       |
| Quantitative variables       | 11      | Explain how quantitative variables were handled in the analyses. If applicable, describe which groupings were chosen and why                                                                                 | 5-7     |
| Statistical methods          | 12      | (a) Describe all statistical methods, including those used to control for confounding                                                                                                                        | 7       |
|                              |         | (b) Describe any methods used to examine subgroups and interactions                                                                                                                                          | 7       |
|                              |         | (c) Explain how missing data were addressed                                                                                                                                                                  | 5       |
|                              |         | (d) If applicable, describe analytical methods taking account of sampling strategy                                                                                                                           | NA      |
|                              |         | (e) Describe any sensitivity analyses                                                                                                                                                                        | 7       |
| <b>Results</b>               |         |                                                                                                                                                                                                              |         |
| Participants                 | 13*     | (a) Report numbers of individuals at each stage of study—eg numbers potentially eligible, examined for eligibility, confirmed eligible, included in the study, completing follow-up, and analysed            | 9       |
|                              |         | (b) Give reasons for non-participation at each stage                                                                                                                                                         | 5       |
|                              |         | (c) Consider use of a flow diagram                                                                                                                                                                           | 5       |
| Descriptive data             | 14*     | (a) Give characteristics of study participants (eg demographic, clinical, social) and information on exposures and potential confounders                                                                     | 9       |
|                              |         | (b) Indicate number of participants with missing data for each variable of interest                                                                                                                          | 9       |
| Outcome data                 | 15*     | Report numbers of outcome events or summary measures                                                                                                                                                         | 9-10    |
| Main results                 | 16      | (a) Give unadjusted estimates and, if applicable, confounder-adjusted estimates and their precision (eg, 95% confidence interval). Make clear which confounders were adjusted for and why they were included | 10-15   |

|                          |    |                                                                                                                                                                            |       |
|--------------------------|----|----------------------------------------------------------------------------------------------------------------------------------------------------------------------------|-------|
|                          |    | (b) Report category boundaries when continuous variables were categorized                                                                                                  | 10-15 |
|                          |    | (c) If relevant, consider translating estimates of relative risk into absolute risk for a meaningful time period                                                           |       |
| Other analyses           | 17 | Report other analyses done—eg analyses of subgroups and interactions, and sensitivity analyses                                                                             | 11-12 |
| <b>Discussion</b>        |    |                                                                                                                                                                            |       |
| Key results              | 18 | Summarise key results with reference to study objectives                                                                                                                   | 17    |
| Limitations              | 19 | Discuss limitations of the study, taking into account sources of potential bias or imprecision. Discuss both direction and magnitude of any potential bias                 | 18-19 |
| Interpretation           | 20 | Give a cautious overall interpretation of results considering objectives, limitations, multiplicity of analyses, results from similar studies, and other relevant evidence | 17-19 |
| Generalisability         | 21 | Discuss the generalisability (external validity) of the study results                                                                                                      | 18-19 |
| <b>Other information</b> |    |                                                                                                                                                                            |       |
| Funding                  | 22 | Give the source of funding and the role of the funders for the present study and, if applicable, for the original study on which the present article is based              | 4-5   |

\*Give information separately for exposed and unexposed groups.

**Note:** An Explanation and Elaboration article discusses each checklist item and gives methodological background and published examples of transparent reporting. The STROBE checklist is best used in conjunction with this article (freely available on the Web sites of PLoS Medicine at <http://www.plosmedicine.org/>, Annals of Internal Medicine at <http://www.annals.org/>, and Epidemiology at <http://www.epidem.com/>). Information on the STROBE Initiative is available at [www.strobe-statement.org](http://www.strobe-statement.org).

# BMJ Open

## Social Determinants and Changes in Energy Drink Consumption among Adolescents in Norway, 2017-2019: A Cross-sectional Study

|                                 |                                                                                                                                                                                                                                                                                                                                                                                                                                                                                                                                                                                                                                                                 |
|---------------------------------|-----------------------------------------------------------------------------------------------------------------------------------------------------------------------------------------------------------------------------------------------------------------------------------------------------------------------------------------------------------------------------------------------------------------------------------------------------------------------------------------------------------------------------------------------------------------------------------------------------------------------------------------------------------------|
| Journal:                        | <i>BMJ Open</i>                                                                                                                                                                                                                                                                                                                                                                                                                                                                                                                                                                                                                                                 |
| Manuscript ID                   | bmjopen-2021-049284.R2                                                                                                                                                                                                                                                                                                                                                                                                                                                                                                                                                                                                                                          |
| Article Type:                   | Original research                                                                                                                                                                                                                                                                                                                                                                                                                                                                                                                                                                                                                                               |
| Date Submitted by the Author:   | 24-Jun-2021                                                                                                                                                                                                                                                                                                                                                                                                                                                                                                                                                                                                                                                     |
| Complete List of Authors:       | Kaldenbach, Siri; Sykehuset Innlandet HF, Department of Paediatric and Adolescent Medicine, Innlandet Hospital Trust; University of Oslo Faculty of Medicine, Clinical Medicine<br>Strand, Tor A.; Sykehuset Innlandet HF, Research Department, Innlandet Hospital Trust; University of Bergen Centre for International Health<br>Solvik, Beate; Sykehuset Innlandet HF, Women's Clinic, Innlandet Hospital Trust; University of Bergen Centre for International Health<br>Holten-Andersen, Mads; Sykehuset Innlandet HF, Department of Paediatric and Adolescent Medicine, Innlandet Hospital Trust; University of Oslo Faculty of Medicine, Clinical Medicine |
| <b>Primary Subject Heading</b>: | Public health                                                                                                                                                                                                                                                                                                                                                                                                                                                                                                                                                                                                                                                   |
| Secondary Subject Heading:      | Epidemiology, Nutrition and metabolism                                                                                                                                                                                                                                                                                                                                                                                                                                                                                                                                                                                                                          |
| Keywords:                       | NUTRITION & DIETETICS, Community child health < PAEDIATRICS, PUBLIC HEALTH                                                                                                                                                                                                                                                                                                                                                                                                                                                                                                                                                                                      |
|                                 |                                                                                                                                                                                                                                                                                                                                                                                                                                                                                                                                                                                                                                                                 |

SCHOLARONE™  
Manuscripts



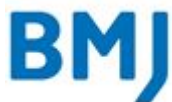

I, the Submitting Author has the right to grant and does grant on behalf of all authors of the Work (as defined in the below author licence), an exclusive licence and/or a non-exclusive licence for contributions from authors who are: i) UK Crown employees; ii) where BMJ has agreed a CC-BY licence shall apply, and/or iii) in accordance with the terms applicable for US Federal Government officers or employees acting as part of their official duties; on a worldwide, perpetual, irrevocable, royalty-free basis to BMJ Publishing Group Ltd ("BMJ") its licensees and where the relevant Journal is co-owned by BMJ to the co-owners of the Journal, to publish the Work in this journal and any other BMJ products and to exploit all rights, as set out in our [licence](#).

The Submitting Author accepts and understands that any supply made under these terms is made by BMJ to the Submitting Author unless you are acting as an employee on behalf of your employer or a postgraduate student of an affiliated institution which is paying any applicable article publishing charge ("APC") for Open Access articles. Where the Submitting Author wishes to make the Work available on an Open Access basis (and intends to pay the relevant APC), the terms of reuse of such Open Access shall be governed by a Creative Commons licence – details of these licences and which [Creative Commons](#) licence will apply to this Work are set out in our licence referred to above.

Other than as permitted in any relevant BMJ Author's Self Archiving Policies, I confirm this Work has not been accepted for publication elsewhere, is not being considered for publication elsewhere and does not duplicate material already published. I confirm all authors consent to publication of this Work and authorise the granting of this licence.

## Title page

### Title: Social Determinants and Changes in Energy Drink Consumption among Adolescents in Norway, 2017-2019: A Cross-sectional Study

Siri Kaldenbach<sup>1, 2</sup>, Tor A. Strand<sup>3, 4</sup>, Beate Stokke Solvik<sup>4, 5</sup>, Mads Holten-Andersen<sup>1, 2</sup>

#### Author's information

Corresponding author: Siri Kaldenbach

Address: Anders Sandvigsgate 17, 2609 Lillehammer, Norway.

Email: [siri.kaldenbach@sykehuset-innlandet.no](mailto:siri.kaldenbach@sykehuset-innlandet.no)

Telephone: +4741086031

#### Departments

1. Sykehuset Innlandet HF, Department of Paediatric and Adolescent Medicine, Innlandet Hospital Trust  
Lillehammer, NO
2. University of Oslo, Institute of Clinical Medicine  
Oslo, NO  
+4741086031

#### Co-authors

Tor A. Strand

3. Sykehuset Innlandet HF, Research Department, Innlandet Hospital Trust  
Lillehammer, NO  
+4790971086
4. University of Bergen, Centre for International Health  
Bergen, NO  
+4790971086

Beate Stokke Solvik

5. Sykehuset Innlandet HF, Women's Clinic, Innlandet Hospital Trust  
Lillehammer, NO  
+4793292801
4. University of Bergen, Center for International Health  
Bergen, NO  
+4793292801

1  
2  
3 Mads Holten-Andersen  
4

- 5 1. Sykehuset Innlandet HF, Department of Paediatric and Adolescent Medicine,  
6 Innlandet Hospital Trust  
7 Lillehammer, NO  
8 +4741487829  
9  
10 2. University of Oslo, Institute of Clinical Medicine  
11 Oslo, NO  
12 +4741487829  
13  
14  
15

16  
17 **Word count abstract: 239**  
18

19  
20 **Word count: 3258**  
21  
22  
23  
24  
25  
26  
27  
28  
29  
30  
31  
32  
33  
34  
35  
36  
37  
38  
39  
40  
41  
42  
43  
44  
45  
46  
47  
48  
49  
50  
51  
52  
53  
54  
55  
56  
57  
58  
59  
60

1  
2  
3 **Social Determinants and Changes in Energy Drink Consumption among Adolescents in**  
4  
5 **Norway, 2017-2019: A Cross-sectional Study**  
6  
7

8 **Objectives:** To describe the social determinants and development in energy drink  
9  
10 consumption among Norwegian adolescents in 2017, 2018 and 2019.  
11  
12

13  
14 **Design:** Cross-sectional, online, annual, nationwide surveys (Ungdata).  
15  
16

17 **Setting:** Responses collected online from January 2017 to December 2019.  
18  
19

20 **Participants:** Lower- and upper secondary school students (n=297,102) aged 12-19 years  
21  
22 who responded in 2017, 2018, and 2019.  
23  
24

25 **Main outcome measures:** Frequency of energy drink consumption.  
26  
27

28  
29 **Results:** Over the three-year period, 66.4% of the males and 41.8% of the females had  
30  
31 consumed energy drink once a week or more. The proportion of female high consumers  
32  
33 (consuming energy drink more than 4 times a week) increased from 3.3% to 4.9% between  
34  
35 2017 and 2019; for males, the increase was from 9.8% to 11.5%. In females the proportion of  
36  
37 high consumers increased with 24% (relative risk (RR); CI) (1.24; 1.09, 1.41) from 2017 to  
38  
39 2018, and 46% (1.46; 1.31, 1.62) from 2017 to 2019. The corresponding increases in males  
40  
41 were 10% (1.10; 1.01, 1.20) from 2017 to 2018, and 12% (1.12; 1.05, 1.19) from 2017to  
42  
43 2019. Any energy drink consumption as well as high energy drink consumption were  
44  
45 independently associated with school level, less central residency, low socioeconomic status,  
46  
47 physical inactivity, and high leisure screen time.  
48  
49  
50  
51

52  
53  
54 **Conclusion:** We found an increase in high consumers among both boys and girls between  
55  
56 2017 and 2019. The observed increase in energy drink consumption among adolescents can  
57  
58 explain some of the increased sales of energy drink in Norway.  
59  
60

## Article summary

### Strengths and limitations of this study:

- This study identifies recent development in the frequency of energy drink consumption among adolescents in Norway.
- Data are derived from a large, annual, national survey in Norway including nearly 300,000 adolescents over three years from 2017 to 2019.
- The study relies on self-reported energy drink consumption, which can be susceptible to both recall bias and social desirability bias.

## INTRODUCTION

Marketed as a booster of mental and physical capacity, energy drinks (ED) have gained worldwide popularity. In Norway, ED sales increased by more than 50% from 2017 to 2019.(1) ED are defined as non-alcoholic beverages that contain at least 150 mg caffeine per litre, in addition to sugar combined with one or more substances known to have stimulant properties.(2-4) Moreover, vitamins, minerals, and amino acids are frequently added to ED.(4) ED marketing is often targeted toward athletes and the adolescent population, and recent studies have shown that viewers of TV-channels with greater ED advertising have increased odds of ED consumption.(5-7)

ED consumption among children and adolescents has been linked to potential negative effects such as increased cardiovascular symptoms with increased cardiac output, but also elevated systolic and diastolic blood pressure.(8) Moreover, sleep disturbance, nervousness, and headache have been reported.(9-12) These potential adverse effects can result in tiredness, inattention, reduced school performance, and increased mental distress. The main cause for concern is the high level of caffeine in ED combined with added sugar and sweet flavour, next to the high content of stimulating substances.(13) According to Iversen et. al, this combination of ingredients may cause faster uptake of caffeine into the circulation compared to regular coffee.(13) Moreover, studies have indicated that adding caffeine to sugar-sweetened beverages (SSB) leads to increased use of SSB, which in turn results in increased energy intake.(14, 15) The high energy intake may contribute to overweight and obesity, as well as dental caries due to the high sugar and citric acid content of ED and SSB.(16)

1  
2  
3 In 2013, the European Food Safety Authority (EFSA) published a report on ED use, indicating  
4 that children and adolescents aged 10-18 years had the highest reported consumption  
5 (68%), compared with adults above 18 years (30%) and children below 10 years (18%).(3)  
6  
7

8  
9  
10 The potential negative effects of ED in children and adolescents have gained the attention of  
11 government authorities in several countries, of which some have issued restrictions on the  
12 caffeine content in ED.(17) The Norwegian Food Safety Authority (NFSA) has stated that the  
13 daily intake of caffeine for children and adolescents should not exceed 2.5 mg/kg. This was  
14 decided based on a review of current knowledge by the Norwegian Scientific Committee for  
15 Food and Environment (VKM).(4)  
16  
17

18 According to the findings of the VKM review, a child or youth would be at risk of sleep  
19 disturbance with an intake of 1.4 mg/kg body weight/day of caffeine.(4) Furthermore, the  
20 risk of negative health effects on the heart and central nervous system would be present at  
21 an intake of 3 mg/kg body weight/day of caffeine. This would mean that a 13-15 years old  
22 adolescent with an average weight of 50 kg would be at risk of sleep disturbance when  
23 drinking more than 70 mg/day of caffeine and at risk of adverse cardiac and central  
24 neurologic effects at daily consumption of 150 mg/day. These values are in line with  
25 recommendations by EFSA and correspond to an intake of one to two large cans (500ml) of  
26 ED for an adolescent described above.(4)  
27  
28  
29  
30  
31  
32  
33  
34  
35  
36  
37  
38  
39  
40  
41  
42  
43  
44  
45  
46

47  
48 ED consumption varies according to age and gender. Several studies have found that male  
49 adolescents are more likely to consume ED than their female counterparts. Moreover, young  
50 (male) adolescents at middle school level have a higher ED consumption compared to older  
51 adolescents at high school level.(3, 18, 19) Furthermore, Degirmenci et al. found that high  
52 consumption (> 4 times a week) of ED was independently associated with male gender,  
53  
54  
55  
56  
57  
58  
59  
60

1  
2  
3 physical inactivity, high leisure screen time, low socioeconomic status, and rural  
4  
5 residency.(20)

6  
7  
8 Of special concern for potential adverse effects are children and adolescents who have lower  
9  
10 body weight, and are more sensitive to ED stimulants, including caffeine. According to the  
11  
12 American Academy of Pediatrics, “Caffeine and other stimulants contained in energy drinks  
13  
14 have no place in the diet of children and adolescents”.(21) Despite the aforementioned  
15  
16 increased sales of ED in Norway, the extent to which the consumption of ED among children  
17  
18 and adolescents followed this development remains unclear.(17) The objective of the  
19  
20 current study is to describe the social determinants and changes in energy drink  
21  
22 consumption among Norwegian adolescents in 2017, 2018, and 2019. Potential social  
23  
24 determinants include age, gender, socio-economic status (SES), residency, physical activity,  
25  
26 and leisure screen time.  
27  
28  
29  
30  
31  
32  
33  
34  
35  
36  
37  
38  
39  
40  
41  
42  
43  
44  
45  
46  
47  
48  
49  
50  
51  
52  
53  
54  
55  
56  
57  
58  
59  
60



## METHODS

### Study design and participants

Data for the study was collected through the Ungdata survey, a national, annual, survey, mapping the health and well-being of lower and upper secondary school students in Norway. The study was approved by the Norwegian Centre for Research Data. Detailed information regarding the survey can be found on [www.ungdata.no](http://www.ungdata.no).<sup>(22)</sup> All data collection is conducted anonymously and web-based during school hours with the teacher present in the classroom. Data from the surveys carried out in 2017, 2018, and 2019 were used for the present study.

All 422 municipalities in Norway (2019) are invited to participate in the Ungdata survey. Participation is free of charge and on a volunteer basis. The municipalities are encouraged to perform the survey every three years in the schools of the municipalities. This is to ensure that all adolescents get to participate once both during lower (8<sup>th</sup> to 10<sup>th</sup> grade) and upper (11<sup>th</sup> to 13<sup>th</sup> grade) secondary school. The three-year interval is not a strict rule, which means that some municipalities participated twice and some all three years (2017-2019). In the present study, information from all municipalities was included regardless of how many years they participated. It is therefore possible that some adolescents responded twice or thrice. In total, we have data from 422 municipalities, 333 participated only once, 59 twice, and one municipality participated all three years. Fewer municipalities participated in the Ungdata survey in 2018, compared to 2017 and 2019 (Figure 1).

In Norway, children start school the year they turn six years old (grade 1) and stay in school until the age of 15-16 years (grade 10). Attending school is obligatory by law until the completion of grade 10 whereas attending subsequent grades is voluntary. National

1  
2  
3 statistics show that the majority of 16- to 18-year-old (93.4% in 2019) go on to attend upper  
4  
5 secondary schools.(23)  
6  
7

8  
9 A total of 297,102 adolescents from both lower and upper secondary schools participated in  
10  
11 the Ungdata surveys in 2017, 2018, and 2019. Of the participating adolescents, 278,891  
12  
13 answered the questions on ED consumption (response rate of 93.9%) and were included in  
14  
15 the analyses (Figure 1).  
16  
17

18  
19 In 2017, missing values for gender were 6.4% compared to less than 1% in 2018 and 2019.

20  
21 This is likely due to the order of questions in the electronic questionnaire, which led to  
22  
23 overlooking of the question regarding gender in the 2017 survey. This ordering of questions  
24  
25 was changed in 2018 and 2019 (personal correspondence with staff from Ungdata).  
26  
27

28  
29 The annual Ungdata Survey is approved by the Norwegian Centre for Research Data (NSD).

30  
31 Participants do not have unique identification numbers as data collection is done  
32  
33 anonymously and does not contain sensitive information. Therefore, no ethical approval was  
34  
35 needed. The study was funded by Innlandet Hospital Trust (project number: 150377).  
36  
37  
38  
39

## 40 **Measures**

41  
42  
43 ED consumption was assessed with the question “How often do you usually drink energy  
44  
45 drinks (Red Bull, Battery, etc.)?” The participants could respond with one of seven  
46  
47 incremental options, ranging from “never” to “several times a day”. The response to this  
48  
49 question was used to categorize adolescents into the following two groups subsequently  
50  
51 used as outcome variables: ED consumers (ED < once a week or more) and high ED  
52  
53 consumers (ED ≥ 4 times a week). The definition of high ED consumers was based on  
54  
55 previous studies.(2, 20) The ED consumers were compared to never ED consumers, and the  
56  
57  
58  
59  
60

1  
2  
3 high ED consumers were compared to the rest (all other frequency of ED consumption  
4  
5 including non-ED).  
6  
7

8  
9 Leisure screen time was assessed using the question “Outside school, how much time do you  
10  
11 normally spend on activities that involve looking at a screen (TV, computer, tablet, mobile  
12  
13 phone) each day?” with options on a seven-point incremental scale ranging from “no time”  
14  
15 to “≥ 6 hours”. The first three options of the variable leisure screen-time were merged into  
16  
17 one response of “≤ 2 hours” due to the relatively low number of respondents in these  
18  
19 categories.  
20  
21  
22

23  
24 Physical activity was assessed by the question “How often do you perform physical activity  
25  
26 which gets you out of breath or makes you sweaty?” with options on a six-point incremental  
27  
28 scale ranging from “never” to “at least five times a week”.  
29  
30

31  
32 SES was assessed according to a five-point scale which again was based on a compound  
33  
34 score from three different dimensions.(24, 25) These dimensions were: parental education,  
35  
36 “culture capital” at home based on the question “how many books do you think there are in  
37  
38 your home?”, and the third dimension used four questions from the Family Affluence Scale  
39  
40 (FAS II). FAS II contains questions regarding the number of cars in the family, whether the  
41  
42 participant has her/his own bedroom, whether the participant has been on vacation, and the  
43  
44 number of computers or tablets in the house. The answers were assigned different points  
45  
46 that were subsequently used to calculate a total score distributed into five equally sized  
47  
48 groups. Group 1 refers to the lowest SES-score and group 5 to the highest.  
49  
50  
51  
52

53  
54 For this study, we used the official Norwegian centrality index to define residency. According  
55  
56 to Statistics Norway, centrality refers to an index of travel time to workplaces and service  
57  
58 functions from all populated basic units. Groups 1 contains the most central municipalities  
59  
60

1  
2  
3 (highest index) and group 6 the least central (lowest index).(26) Residency for each  
4  
5 individual is based on where the adolescent attends school and is not per se the place of  
6  
7 living.  
8  
9

10  
11 Further details on variables and answer options are given in Table 1.  
12  
13

### 14 **Statistical analyses**

15  
16  
17 The association between the outcome variables (any and high ED consumption) and the  
18  
19 independent variables were estimated in multivariable Poisson regression models. These  
20  
21 models allowed us to estimate the risk ratios (RR) between the categories of the  
22  
23 independent variables.(27-29) We used the sandwich estimation method to generate robust  
24  
25 standard errors.(27) We also included interaction terms between year and gender to  
26  
27 estimate the extent to which these variables modified each other's association with the  
28  
29 outcomes. In other words, we assessed if the association between gender and energy drinks  
30  
31 differed by year and the extent to which the association between year and the consumption  
32  
33 of ED differed by gender. The independent variables in the statistical models were decided *a*  
34  
35 *priori* and consisted of: gender, year, grade, residency, SES, frequency of physical activity and  
36  
37 leisure screen time. We adjusted the standard errors for clustering within the municipalities.  
38  
39  
40  
41  
42  
43

44  
45 The interactions terms between gender and year were estimated both on an additive and a  
46  
47 multiplicative scale using generalized linear models with identity and log link,  
48  
49 respectively.(30) In these models we estimated the significance of the interaction terms  
50  
51 using likelihood ratio tests. STATA version 15.1 (College Station, Texas) was used for all  
52  
53 statistical analysis.(31)  
54  
55

### 56 **Patient and public involvement**

57  
58  
59  
60

1  
2  
3  
4  
5  
6  
7  
8  
9  
10  
11  
12  
13  
14  
15  
16  
17  
18  
19  
20  
21  
22  
23  
24  
25  
26  
27  
28  
29  
30  
31  
32  
33  
34  
35  
36  
37  
38  
39  
40  
41  
42  
43  
44  
45  
46  
47  
48  
49  
50  
51  
52  
53  
54  
55  
56  
57  
58  
59  
60

There were no patients involved in the study.

For peer review only

## RESULTS

In total, 278,891 adolescents who participated in Ungdata answered the question about ED use and were included for further analyses. Most of the adolescents (57.5%) attended lower secondary school (Table 1). Grade thirteen was the least represented grade in the sample, which is in line with previous findings from the Ungdata survey.(24)

Most of the participants attended schools in municipalities with the centrality index two and three. The distribution seen in Table 1 is comparable to the overall distribution of the centrality index in Norway.(32) A lesser percentage in level six was expected, as fewer people are living in these areas.

*Table 1. Baseline Characteristics of Adolescents participating in the Ungdata surveys in 2017, 2018 and 2019.*

| VARIABLE               | TOTAL (%)      | 2017 (%)      | 2018 (%)      | 2019 (%)      |
|------------------------|----------------|---------------|---------------|---------------|
| <b>N</b>               | 278,891        | 101,997       | 66,017        | 110,877       |
| <b>SCHOOL LEVEL</b>    |                |               |               |               |
| <i>LOWER SECONDARY</i> | 160,352 (57.5) | 61,768 (60.6) | 38,256 (57.9) | 60,328 (54.4) |
| <i>UPPER SECONDARY</i> | 118,539 (42.5) | 40,229 (39.4) | 27,761 (42.1) | 50,549 (45.6) |
| <b>GRADE</b>           |                |               |               |               |
| <i>8</i>               | 52,984 (19.0)  | 20,381 (20.0) | 12,695 (19.2) | 19,908 (18.0) |
| <i>9</i>               | 51,393 (18.4)  | 19,514 (19.1) | 12,558 (19.0) | 19,321 (17.4) |
| <i>10</i>              | 50,547 (18.1)  | 19,632 (19.2) | 11,687 (17.7) | 19,228 (17.3) |
| <i>11</i>              | 50,972 (18.3)  | 18,580 (18.2) | 11,190 (16.9) | 21,202 (19.1) |
| <i>12</i>              | 40,391 (14.5)  | 12,824 (12.6) | 9360 (14.2)   | 18,207 (16.4) |
| <i>13</i>              | 26,351 (9.5)   | 8632 (8.5)    | 7091 (10.7)   | 10,628 (9.6)  |
| <i>MISSING</i>         | 6253 (2.2)     | 2434 (2.4)    | 1436 (2.2)    | 2383 (2.2)    |
| <b>GENDER</b>          |                |               |               |               |
| <i>FEMALE</i>          | 138,218 (49.6) | 47,218 (46.3) | 31,802 (48.2) | 54,020 (48.7) |
| <i>MALE</i>            | 133,040 (47.7) | 48,254 (47.3) | 33,908 (51.4) | 56,056 (50.6) |

|                                       |                |               |               |               |
|---------------------------------------|----------------|---------------|---------------|---------------|
| <i>MISSING</i>                        | 7633 (2.7)     | 6525 (6.4)    | 307 (0.5)     | 801 (0.7)     |
| <b>RESIDENCY</b>                      |                |               |               |               |
| <i>1</i>                              | 56,012 (20.2)  | 14,909 (14.7) | 22,358 (34.0) | 18,745 (16.9) |
| <i>2</i>                              | 63,413 (22.8)  | 30,793 (30.5) | 5601 (8.5)    | 27,019 (24.4) |
| <i>3</i>                              | 74,853 (26.9)  | 23,190 (22.9) | 16,117 (25.5) | 35,546 (32.1) |
| <i>4</i>                              | 46,826 (16.9)  | 16,688 (16.5) | 11,286 (17.1) | 18,852 (17.0) |
| <i>5</i>                              | 27,900 (10.0)  | 12,358 (12.2) | 7609 (11.6)   | 7933 (7.1)    |
| <i>6</i>                              | 8847 (3.2)     | 3195 (3.2)    | 2870 (4.4)    | 2782 (2.5)    |
| <b>FREQUENCY OF PHYSICAL ACTIVITY</b> |                |               |               |               |
| <i>NEVER</i>                          | 4518 (1.6)     | 1374 (1.3)    | 1218 (1.8)    | 1926 (1.7)    |
| <i>SELDOM</i>                         | 19,642 (7.0)   | 6314 (6.2)    | 4997 (7.6)    | 8331 (7.5)    |
| <i>1-2 TIMES A MONTH</i>              | 18,007 (6.5)   | 6105 (6.0)    | 4709 (7.1)    | 7193 (6.5)    |
| <i>1-2 TIMES A WEEK</i>               | 75,687 (27.1)  | 26,901 (26.4) | 18,484 (28.0) | 30,302 (27.3) |
| <i>3-4 TIMES A WEEK</i>               | 89,537 (32.1)  | 33,164 (32.5) | 20,458 (31.0) | 35,915 (32.4) |
| <i>≥ 5 TIMES A WEEK</i>               | 65,897 (23.6)  | 25,472 (25.0) | 14,402 (21.8) | 26,023 (23.5) |
| <i>MISSING</i>                        | 5603 (2.0)     | 2667 (2.6)    | 1749 (2.7)    | 1187 (1.1)    |
| <b>LEISURE SCREEN TIME</b>            |                |               |               |               |
| <i>≤ 2 HOURS DAILY</i>                | 43,234 (15.5)  | 17,734 (17.4) | 10,355 (15.7) | 15,145 (13.7) |
| <i>2-3 HOURS DAILY</i>                | 60,567 (21.7)  | 22,786 (22.3) | 14,284 (21.6) | 23,497 (21.2) |
| <i>3-4 HOURS DAILY</i>                | 75,781 (27.2)  | 27,296 (26.8) | 17,654 (26.7) | 30,831 (27.8) |
| <i>4-6 HOURS DAILY</i>                | 59,250 (21.2)  | 20,379 (20.0) | 13,878 (21.0) | 24,993 (22.5) |
| <i>≥ 6 HOURS DAILY</i>                | 36,168 (13.0)  | 12,563 (12.3) | 8873 (13.4)   | 14,732 (13.3) |
| <i>MISSING</i>                        | 3891 (1.4)     | 1239 (1.2)    | 973 (1.5)     | 1679 (1.5)    |
| <b>ENERGY DRINKS CONSUMPTION</b>      |                |               |               |               |
| <i>NEVER</i>                          | 128,365 (46.0) | 46,782 (45.9) | 31,055 (47.0) | 50,528 (45.6) |
| <i>&lt; ONCE A WEEK</i>               | 71,200 (25.5)  | 27,530 (27.0) | 16,594 (25.1) | 27,076 (24.4) |
| <i>ONCE A WEEK</i>                    | 29,653 (10.6)  | 10,936 (10.7) | 6784 (10.3)   | 11,933 (10.8) |
| <i>2-3 TIMES A WEEK</i>               | 28,974 (10.4)  | 10,065 (9.9)  | 6595 (10.0)   | 12,314 (11.1) |
| <i>4-6 TIMES A WEEK</i>               | 12,310 (4.4)   | 4038 (4.0)    | 2843 (4.3)    | 5429 (4.9)    |

|                     |            |            |            |            |
|---------------------|------------|------------|------------|------------|
| EVERY DAY           | 4080 (1.5) | 1250 (1.2) | 1005 (1.5) | 1825 (1.6) |
| SEVERAL TIMES A DAY | 4309 (1.5) | 1396 (1.4) | 1141 (1.7) | 1772 (1.6) |

Between 20-30% of the participants reported performing some kind of physical activity where they get sweaty either 1-2, 3-4, or more than 5 times a week, while less than 10% reported 1-2 times a month or less. In addition, more than 10% spent 6 hours or more looking at a screen. Overall, 46% of the participants had never consumed ED and 7.4% had consumed ED more than 4 times a week.

Over the three years, there was a small decrease in the percentage of boys consuming ED from 67.3% (CI: 66.9-67.7) in 2017 to 65.7% (CI: 65.3-66.1) in 2019. Among girls, a small increase was found from 40.8% (CI: 40.4-41.3) in 2017 to 43.6% (CI: 43.1-44.0) in 2019 (Figure 2). However, high ED consumers increased among both boys and girls (Figure 3). In 2017, 9.8% (CI: 9.5-10.0) of the boys and 3.3% (CI: 3.1-3.4) of the girls reported ED consumption in the range of high consumers, while these percentages increased to 11.5% (CI: 11.2-11.7) in boys and 4.9% (CI: 4.7-5.1) in girls in 2019.

Table 2 shows the annual increase in high ED consumption among both boys and girls. The proportion of female high ED consumers increased by 46% over the period. That is, the proportion of female high consumers increased by 24% (RR; CI) (1.24; 1.09, 1.41) from 2017 to 2018, and by 46% (1.46; 1.31, 1.62) from 2017 to 2019. There was also an increase in the proportion of high consumers of ED in boys, however, this increase was lower at 12% (1.12; 1.05, 1.19) from 2017 to 2019. On a multiplicative scale, the interaction terms between gender and year were statistically significant for 2019 (Table 2). However, on an additive scale there was no interaction found according to the generalized linear models as the difference in percentage points was almost identical (1.7 in boys and 1.6 in girls). Table 2



1  
2  
3 demonstrates the results from the Poisson regression models adjusted for clustering of  
4  
5 municipalities. As no substantial differences between the crude and adjusted estimates from  
6  
7 the Poisson regression models were found, only adjusted results are shown.  
8  
9  
10  
11  
12  
13  
14  
15  
16  
17  
18  
19  
20  
21  
22  
23  
24  
25  
26  
27  
28  
29  
30  
31  
32  
33  
34  
35  
36  
37  
38  
39  
40  
41  
42  
43  
44  
45  
46  
47  
48  
49  
50  
51  
52  
53  
54  
55  
56  
57  
58  
59  
60

For peer review only

Table 2. Determinants for being energy drink consumers (any ED or high ED) in Norwegian adolescents.

| VARIABLE                                                                       | TOTAL SAMPLE |        |      | ED CONSUMERS |            | HIGH ED CONSUMERS |      |      |            |
|--------------------------------------------------------------------------------|--------------|--------|------|--------------|------------|-------------------|------|------|------------|
|                                                                                | n            | n      | %    | RR           | 95% CI     | n                 | %    | RR   | 95% CI     |
| <b>INTERACTION TERMS</b>                                                       |              |        |      | 1            |            |                   |      | 1    |            |
| <i>INTERACTION GENDER AND YEAR - 2018</i>                                      |              |        |      | 0.99         | 0.90, 1.10 |                   |      | 0.89 | 0.78, 1.01 |
| <i>INTERACTION GENDER AND YEAR - 2019</i>                                      |              |        |      | 0.91         | 0.89, 0.94 |                   |      | 0.77 | 0.69, 0.84 |
| <b>SUBGROUPS</b>                                                               |              |        |      |              |            |                   |      |      |            |
| <b>YEAR</b>                                                                    |              |        |      |              |            |                   |      |      |            |
| <i>2017 FEMALE</i>                                                             | 48,254       | 19,700 | 40.8 | 1            |            | 1571              | 3.3  | 1    |            |
| <i>2018 FEMALE</i>                                                             | 33,908       | 13,702 | 40.4 | 0.98         | 0.91, 1.06 | 1410              | 4.2  | 1.24 | 1.09, 1.41 |
| <i>2019 FEMALE</i>                                                             | 56,056       | 24,414 | 43.5 | 1.05         | 1.02, 1.09 | 2759              | 4.9  | 1.46 | 1.31, 1.62 |
| <i>2017 MALE</i>                                                               | 47,218       | 31,785 | 67.3 | 1            |            | 4620              | 9.8  | 1    |            |
| <i>2018 MALE</i>                                                               | 31,802       | 21,097 | 66.3 | 0.98         | 0.94, 1.01 | 3554              | 11.2 | 1.10 | 1.01, 1.20 |
| <i>2019 MALE</i>                                                               | 54,020       | 35,491 | 65.7 | 0.96         | 0.95, 0.98 | 6190              | 11.5 | 1.12 | 1.05, 1.19 |
| <b>ASSOCIATION BETWEEN GENDER AND ED PER YEAR (FEMALES IN REFERENCE GROUP)</b> |              |        |      |              |            |                   |      |      |            |

|    |                             |        |        |      |      |            |      |      |                 |
|----|-----------------------------|--------|--------|------|------|------------|------|------|-----------------|
| 1  |                             |        |        |      |      |            |      |      |                 |
| 2  |                             |        |        |      |      |            |      |      |                 |
| 3  | <i>MALE 2017</i>            |        |        |      | 1.64 | 1.57, 1.71 |      | 2.79 | 2.58, 3.03      |
| 4  |                             |        |        |      |      |            |      |      |                 |
| 5  | <i>MALE 2018</i>            |        |        |      | 1.62 | 1.48, 1.78 |      | 2.48 | 2.24, 2.75      |
| 6  |                             |        |        |      |      |            |      |      |                 |
| 7  | <i>MALE 2019</i>            |        |        |      | 1.49 | 1.43, 1.56 |      | 2.14 | 2.01, 2.29      |
| 8  |                             |        |        |      |      |            |      |      |                 |
| 9  | <b>GRADE</b>                |        |        |      |      |            |      |      |                 |
| 10 |                             |        |        |      |      |            |      |      |                 |
| 11 | 8                           | 52,984 | 22,741 | 42.9 | 1    |            | 2533 | 4.8  | 1               |
| 12 |                             |        |        |      |      |            |      |      |                 |
| 13 | 9                           | 51,393 | 26,914 | 52.4 | 1.20 | 1.18, 1.22 | 3224 | 6.3  | 1.25 1.17, 1.33 |
| 14 |                             |        |        |      |      |            |      |      |                 |
| 15 | 10                          | 50,547 | 28,215 | 55.8 | 1.26 | 1.24, 1.29 | 3654 | 7.2  | 1.39 1.30, 1.49 |
| 16 |                             |        |        |      |      |            |      |      |                 |
| 17 | 11                          | 50,972 | 30,154 | 59.2 | 1.34 | 1.30, 1.38 | 4756 | 9.3  | 1.79 1.64, 1.95 |
| 18 |                             |        |        |      |      |            |      |      |                 |
| 19 | 12                          | 40,391 | 23,925 | 59.2 | 1.34 | 1.30, 1.39 | 3886 | 9.6  | 1.85 1.67, 2.04 |
| 20 |                             |        |        |      |      |            |      |      |                 |
| 21 | 13                          | 26,351 | 14,864 | 56.4 | 1.32 | 1.27, 1.38 | 2154 | 8.2  | 1.74 1.56, 1.94 |
| 22 |                             |        |        |      |      |            |      |      |                 |
| 23 | <b>RESIDENCY</b>            |        |        |      |      |            |      |      |                 |
| 24 |                             |        |        |      |      |            |      |      |                 |
| 25 | 1                           | 56,012 | 26,965 | 48.1 | 1    |            | 3254 | 5.8  | 1               |
| 26 |                             |        |        |      |      |            |      |      |                 |
| 27 | 2                           | 63,413 | 32,609 | 51.4 | 1.06 | 1.03, 1.10 | 4355 | 6.9  | 1.20 1.04, 1.37 |
| 28 |                             |        |        |      |      |            |      |      |                 |
| 29 | 3                           | 74,853 | 40,723 | 54.4 | 1.11 | 1.09, 1.13 | 5738 | 7.7  | 1.27 1.11, 1.46 |
| 30 |                             |        |        |      |      |            |      |      |                 |
| 31 | 4                           | 46,826 | 27,433 | 58.6 | 1.20 | 1.16, 1.23 | 4077 | 8.7  | 1.46 1.28, 1.66 |
| 32 |                             |        |        |      |      |            |      |      |                 |
| 33 | 5                           | 27,900 | 16,895 | 60.6 | 1.25 | 1.21, 1.29 | 2467 | 8.8  | 1.54 1.34, 1.77 |
| 34 |                             |        |        |      |      |            |      |      |                 |
| 35 | 6                           | 8847   | 5329   | 60.2 | 1.24 | 1.17, 1.30 | 750  | 8.5  | 1.58 1.34, 1.86 |
| 36 |                             |        |        |      |      |            |      |      |                 |
| 37 | <b>SOCIOECONOMIC STATUS</b> |        |        |      |      |            |      |      |                 |
| 38 |                             |        |        |      |      |            |      |      |                 |
| 39 | 5 HIGHEST                   | 56,418 | 28,084 | 49.8 | 1    |            | 3133 | 5.6  | 1               |
| 40 |                             |        |        |      |      |            |      |      |                 |
| 41 |                             |        |        |      |      |            |      |      |                 |
| 42 |                             |        |        |      |      |            |      |      |                 |
| 43 |                             |        |        |      |      |            |      |      |                 |
| 44 |                             |        |        |      |      |            |      |      |                 |
| 45 |                             |        |        |      |      |            |      |      |                 |
| 46 |                             |        |        |      |      |            |      |      |                 |

|                            |        |        |      |      |            |      |      |      |            |
|----------------------------|--------|--------|------|------|------------|------|------|------|------------|
| 4                          | 55,641 | 29,692 | 53.4 | 1.04 | 1.03, 1.05 | 3665 | 6.6  | 1.09 | 1.05, 1.14 |
| 3                          | 55,935 | 30,532 | 54.6 | 1.06 | 1.05, 1.07 | 4199 | 7.5  | 1.22 | 1.17, 1.28 |
| 2                          | 55,947 | 31,269 | 55.9 | 1.07 | 1.06, 1.08 | 4542 | 8.1  | 1.28 | 1.22, 1.35 |
| 1 LOWEST                   | 54,950 | 30,949 | 56.3 | 1.08 | 1.07, 1.10 | 5160 | 9.4  | 1.46 | 1.39, 1.53 |
| <b>PHYSICAL ACTIVITY</b>   |        |        |      |      |            |      |      |      |            |
| NEVER                      | 4518   | 2481   | 54.9 | 1    |            | 782  | 17.3 | 1    |            |
| SELDOM                     | 19,642 | 11,086 | 56.4 | 1.05 | 1.01, 1.08 | 2002 | 10.2 | 0.65 | 0.58, 0.72 |
| 1-2 TIMES A MONTH          | 18,007 | 9903   | 55.0 | 1.04 | 1.01, 1.07 | 1357 | 7.5  | 0.53 | 0.48, 0.58 |
| 1-2 TIMES A WEEK           | 75,687 | 40,581 | 53.6 | 1.02 | 0.98, 1.05 | 5058 | 6.7  | 0.50 | 0.45, 0.55 |
| 3-4 TIMES A WEEK           | 89,537 | 47,874 | 53.5 | 1.03 | 1.00, 1.06 | 5614 | 6.3  | 0.52 | 0.47, 0.57 |
| ≥ 5 TIMES A WEEK           | 65,897 | 35,312 | 53.6 | 1.01 | 0.98, 1.05 | 5173 | 7.9  | 0.62 | 0.57, 0.68 |
| <b>LEISURE SCREEN TIME</b> |        |        |      |      |            |      |      |      |            |
| ≤ 2 HOURS DAILY            | 43,234 | 18,797 | 43.5 | 1    |            | 1978 | 4.6  | 1    |            |
| 2-3 HOURS DAILY            | 60,567 | 28,922 | 47.8 | 1.10 | 1.09, 1.11 | 2659 | 4.4  | 1.00 | 0.95, 1.06 |
| 3-4 HOURS DAILY            | 75,781 | 40,778 | 53.8 | 1.22 | 1.20, 1.24 | 4514 | 6.0  | 1.33 | 1.26, 1.40 |
| 4-6 HOURS DAILY            | 59,250 | 35,462 | 59.9 | 1.32 | 1.30, 1.34 | 4950 | 8.4  | 1.79 | 1.70, 1.88 |
| ≥ 6 HOURS DAILY            | 36,168 | 24,214 | 66.9 | 1.42 | 1.40, 1.45 | 6026 | 16.7 | 3.15 | 3.00, 3.32 |

ED: Energy drink; RR: Relative Risk; CI: Confidence Interval; <sup>a</sup> Modified Poisson regression with robust variance estimation; <sup>b</sup> Estimates are statistically significant if their CIs do not include 1.0. Total sample n= 256,801. Walds test shows statistically significant p-values at p<0.05. Loglikelihood ratio test of complete interaction term was significant at p<0.01.

1  
2  
3 The association between ED consumption and social determinants (Table 2) showed that the  
4 largest proportion of high ED consumers was found in participants living in centrality index 6  
5 (least central residency). Furthermore, we found a larger proportion of high ED consumers  
6 with decreasing SES. The same association was found when looking at the any ED  
7 consumption group, although differences were less pronounced. There was a relationship  
8 between high ED consumption and physical activity. Here, the lowest proportion was  
9 observed for those who were physically active 1-2 times a week compared to those who  
10 were never being physically active. However, this was not observed for the any ED  
11 consumption group. Regarding both the participants who consumed any ED as well as the  
12 high consumers, the proportions increased with increasing leisure screen time. The  
13 proportion of high ED consumers that spent more than 6 hours looking at a screen outside  
14 school hours was three times higher than the high ED consumers that spent less than 2  
15 hours looking at a screen.  
16  
17  
18  
19  
20  
21  
22  
23  
24  
25  
26  
27  
28  
29  
30  
31  
32  
33  
34  
35  
36  
37  
38  
39  
40  
41  
42  
43  
44  
45  
46  
47  
48  
49  
50  
51  
52  
53  
54  
55  
56  
57  
58  
59  
60

## DISCUSSION

We have described social determinants and changes in ED consumption among Norwegian adolescents between 2017 and 2019. We found an increase in the percentage of both boys and girls being high ED consumers and a change in ED consumption according to time. The main finding was an increasing proportion of female high ED consumers, which is of special interest as it highlights the fact that despite male high ED consumers still being the gender consuming most ED, females high ED consumers are catching up.

We found that in total, over the three years, 4.2% of the girls and 10.8% of the boys were high ED consumers. There was an annual increase in the proportion of high consumers that was most pronounced for girls increasing from 3.3% in 2017 to 4.9% in 2019. Moreover, we found that more than half of the adolescents participating in the study had consumed any ED during these three years. The increase in high ED consumption was expected as sales in ED in Norway have increased. However, adolescents are most likely not the only group consuming increasing amounts of ED. It is plausible that other groups in the population follow the same trend in ED consumption.

High ED consumption was positively associated with the male gender, lower SES, rural living, excessive screen watching, physical inactivity, and being very physically active. The combination of either low or high physical activity and high leisure screen-time as predictors for ED consumption was also found in other studies from Saudi Arabia, Canada, and the U.S.(3, 18, 33-35) Al-Hazza et. al proposed that the reason why both low and high physical activity and high leisure screen-time was observed, is due to how ED are being marketed.(33)

1  
2  
3 According to the study by Emond et. al on ED advertisement, ED was primarily advertised on  
4 channels with adolescents as their base audience.(5) Based on this, one could imagine that  
5 increased screen time and thereby increased exposure to ED advertising would lead to  
6 higher ED consumption rates.(7) In addition, Hammond et. al. found that TV was the main  
7 common source of marketing of ED to adolescents next to marketing in grocery stores.(36)  
8  
9 Our results also suggest that adolescents who spend much of their spare time watching  
10 screens are those who consume most ED. Regarding the gender difference in high ED  
11 consumption, one could hypothesize that the marketing of ED appeals more to boys as they  
12 are the ones consuming more ED.  
13  
14

15  
16 Our results show that even though boys still are the highest consumers of ED, the increase in  
17 the proportion of female high consumers was larger, on a multiplicative scale but not an  
18 additive scale, compared to males over the three years. The increase was 1.7 percentage  
19 points for boys (9.8-11.5%) and 1.6 for girls (3.3-4.9%) from 2017 until 2019. Based on this  
20 finding it could be speculated that girls are becoming more exposed and perhaps more  
21 susceptible to ED marketing than before.  
22  
23  
24  
25  
26  
27  
28  
29  
30  
31  
32  
33  
34  
35  
36  
37  
38  
39  
40

### 41 **Limitations and strengths**

42  
43 A limitation of the study is that we were not able to take the regional differences in  
44 participation of schools each year into account. This might have affected the observed  
45 development of ED consumption seen over the three years. However, the breadth of the  
46 municipalities participating in the Ungdata study in 2017, 2018 and 2019 with an even  
47 distribution of smaller and larger communities spread out across Norway makes the sample  
48 sufficiently large and wide-reaching. Moreover, the participants are not completely selected  
49 at random as only municipalities who wanted to participate in the Ungdata survey were  
50  
51  
52  
53  
54  
55  
56  
57  
58  
59  
60

1  
2  
3 included in the study. In addition, the participating schools within these municipalities were  
4  
5 not selected completely at random. The lower secondary schools are run by the  
6  
7 municipalities while the upper secondary schools are organized according to regional  
8  
9 districts, therefore the schools have different catchment areas when it comes to children  
10  
11 attending the schools.  
12  
13

14  
15  
16 Other limitations common to such surveys are that the study relies on self-reported ED  
17  
18 consumption which can be susceptible to both recall bias and social desirability bias.(37)  
19  
20 Moreover, only children who attended school on the day of the survey answered the  
21  
22 questionnaire. Adolescents who were absent or had dropped out were therefore not  
23  
24 included in the study, which might have affected the results. Finally, some adolescents might  
25  
26 have participated more than once, yet no adjustment for lack of independence between  
27  
28 these observations was possible.  
29  
30  
31

32  
33  
34 The major strength of this study is the large sample included, with close to 300,000  
35  
36 adolescents answering the questionnaire and a response from 74.4% of the total eligible  
37  
38 students in this time period.  
39  
40

## 41 **CONCLUSION**

42  
43  
44 ED consumption is increasing among female adolescents, especially high ED consumption.  
45  
46 This is an important finding to consider in future research which could focus on possible  
47  
48 gender-related differences when studying various aspects of ED consumption. In addition,  
49  
50 with rising ED consumption it is increasingly important to investigate the potential long-term  
51  
52 effects of ED use among adolescents.  
53  
54  
55  
56  
57  
58  
59  
60



**REFERENCES**

1. Drikkeglede.no. Salgstall Energidrikker [updated 13-05-2020. Available from: [https://www.drikkeglede.no/tall\\_og\\_fakta/?PT\\_Radnr=5&mnd=3&aar=2020](https://www.drikkeglede.no/tall_og_fakta/?PT_Radnr=5&mnd=3&aar=2020).
2. Zucconi S., Volpato C., Adinolfi F., et al. Gathering consumption data on specific consumer groups of energy drinks. 2013;EN-394:190.
3. Visram S, Cheetham M, Riby DM, et al. Consumption of energy drinks by children and young people: a rapid review examining evidence of physical effects and consumer attitudes. BMJ Open. 2016;6(10):e010380.
4. VKM, Bruzell E, Carlsen MH, et al. Risk assessment of energy drinks and caffeine. Scientific opinion of the Panel of Food Additives, Flavourings, Processing Aids, Materials in Contact with Food, and Cosmetics of the Norwegian Scientific Committee for Food and Environment., Norwegian Scientific Committee for Food and Environment (VKM); 2019. Report No.: 01.
5. Emond JA, Sargent JD, Gilbert-Diamond D. Patterns of energy drink advertising over US television networks. Journal of nutrition education and behavior. 2015;47(2):120-6.e1.
6. Stacey N, van Walbeek C, Maboshe M, et al. Energy drink consumption and marketing in South Africa. Preventive medicine. 2017;105s:S32-s6.
7. Wiggers D, Asbridge M, Baskerville NB, et al. Exposure to Caffeinated Energy Drink Marketing and Educational Messages among Youth and Young Adults in Canada. International journal of environmental research and public health. 2019;16(4).
8. Grasser EK, Yepuri G, Dulloo AG, et al. Cardio- and cerebrovascular responses to the energy drink Red Bull in young adults: a randomized cross-over study. European journal of nutrition. 2014;53(7):1561-71.

- 1  
2  
3 9. Dawodu A, Cleaver K. Behavioural correlates of energy drink consumption among  
4 adolescents: A review of the literature. *Journal of Child Health Care*. 2017;21(4):446-62.  
5  
6  
7
- 8 10. Brand S, Kirov R. Sleep and its importance in adolescence and in common adolescent  
9 somatic and psychiatric conditions. *International journal of general medicine*. 2011;4:425-42.  
10  
11  
12
- 13 11. Kronholm E, Puusniekka R, Jokela J, et al. Trends in self-reported sleep problems,  
14 tiredness and related school performance among Finnish adolescents from 1984 to 2011.  
15 *Journal of sleep research*. 2015;24(1):3-10.  
16  
17  
18
- 19 12. Harris JL, Munsell CR. Energy drinks and adolescents: what's the harm? *Nutr Rev*.  
20 2015;73(4):247-57.  
21  
22  
23
- 24 13. Iversen KL, Arnesen E, Meltzer HM, et al. Children and adolescents need protection  
25 against energy drinks. *Tidsskrift for den Norske lægeforening : tidsskrift for praktisk medicin,*  
26 *ny række*. 2018;138(14).  
27  
28  
29
- 30 14. Keast RS, Swinburn BA, Sayompark D, et al. Caffeine increases sugar-sweetened  
31 beverage consumption in a free-living population: a randomised controlled trial. *The British*  
32 *journal of nutrition*. 2015;113(2):366-71.  
33  
34  
35  
36  
37  
38
- 39 15. Temple JL, Dewey AM, Briatico LN. Effects of acute caffeine administration on  
40 adolescents. *Experimental and clinical psychopharmacology*. 2010;18(6):510-20.  
41  
42  
43
- 44 16. Breda JJ, Whiting SH, Encarnacao R, et al. Energy drink consumption in europe: a  
45 review of the risks, adverse health effects, and policy options to respond. *Frontiers in public*  
46 *health*. 2014;2:134.  
47  
48  
49
- 50 17. Mattilsynet. Energidrikker og koffein. Mattilsynets anbefaling til Helse- og  
51 omsorgsdepartementet. 2019.  
52  
53  
54  
55  
56  
57  
58  
59  
60

- 1  
2  
3 18. Azagba S, Langille D, Asbridge M. An emerging adolescent health risk: caffeinated  
4 energy drink consumption patterns among high school students. Preventive medicine.  
5 2014;62:54-9.  
6  
7  
8  
9
- 10 19. Sampasa-Kanyinga H, Masengo L, Hamilton H, et al. Energy Drink Consumption and  
11 Substance Use among Middle and High School Students. International journal of  
12 environmental research and public health. 2020;17(9).  
13  
14  
15  
16
- 17 20. Degirmenci N, Fossum IN, Strand TA, et al. Consumption of energy drinks among  
18 adolescents in Norway: a cross-sectional study. BMC public health. 2018;18(1):1391.  
19  
20  
21  
22
- 23 21. Committee on Nutrition and the Council on Sports Medicine and Fitness. Sports  
24 drinks and energy drinks for children and adolescents: are they appropriate? Pediatrics.  
25 2011;127(6):1182-9.  
26  
27  
28
- 29 22. Ungdata. About Ungdata 2020 [Available from: <https://www.ungdata.no/english/>.  
30  
31  
32
- 33 23. Keute A-L, Bratholmen NVL. Upper secondary education (Videregående opplæring og  
34 annen videregående utdanning) 2020 [updated 27-02-2020. Available from:  
35 <https://www.ssb.no/vgu>.  
36  
37  
38
- 39 24. Bakken A. Ungdata. Nasjonale resultater 2019.: NOVA, OsloMet; 2019. Report No.:  
40 NOVA Rapport 9/19, .  
41  
42  
43
- 44 25. Frøyland L R. Ungdata - Lokale ungdomsundersøkelser. Dokumentasjon av variablene  
45 i spørreskjemaet. . NOVA; 2017.  
46  
47  
48
- 49 26. Bloch VVH. Classification of centrality 2020 [Available from:  
50 <https://www.ssb.no/en/klass/klassifikasjoner/128/versjon/1292/om>.  
51  
52  
53
- 54 27. Zou G. A modified poisson regression approach to prospective studies with binary  
55 data. American journal of epidemiology. 2004;159(7):702-6.  
56  
57  
58  
59  
60

- 1  
2  
3 28. Knol MJ, Le Cessie S, Algra A, et al. Overestimation of risk ratios by odds ratios in  
4 trials and cohort studies: alternatives to logistic regression. *CMAJ : Canadian Medical*  
5 *Association journal = journal de l'Association medicale canadienne.* 2012;184(8):895-9.  
6  
7  
8  
9  
10 29. Rojanaworarit C, Wong JJ. Investigating the Source of a Disease Outbreak Based on  
11 Risk Estimation: A Simulation Study Comparing Risk Estimates Obtained From Logistic and  
12 Poisson Regression Applied to a Dichotomous Outcome. *The Ochsner journal.*  
13 2019;19(3):220-6.  
14  
15  
16  
17  
18 30. Richardson DB, Kaufman JS. Estimation of the relative excess risk due to interaction  
19 and associated confidence bounds. *American journal of epidemiology.* 2009;169(6):756-60.  
20  
21  
22  
23  
24 31. StataCorp. *Stata Statistical Software: Release 15.* College Station, TX: StataCorp LLC;  
25 2017.  
26  
27  
28  
29 32. Høydahl E. *Ny sentralitetsindes for kommunene - New centrality index for the*  
30 *municipalities.* Statistics Norway; 2017.  
31  
32  
33  
34 33. Al-Hazaa HM, Al-Sobayel HI, Abahussain NA, et al. Association of dietary habits with  
35 levels of physical activity and screen time among adolescents living in Saudi Arabia. *Journal*  
36 *of Human Nutrition & Dietetics.* 2014;27 Suppl 2:204-13.  
37  
38  
39  
40  
41 34. Larson N, DeWolfe J, Story M, et al. Adolescent Consumption of Sports and Energy  
42 Drinks: Linkages to Higher Physical Activity, Unhealthy Beverage Patterns, Cigarette Smoking,  
43 and Screen Media Use. *Journal of Nutrition Education & Behavior.* 2014;46(3):181-7.  
44  
45  
46  
47  
48 35. Nowak D, Jasionowski A. Analysis of the Consumption of Caffeinated Energy Drinks  
49 among Polish Adolescents. *International Journal of Environmental Research & Public Health*  
50 *[Electronic Resource].* 2015;12(7):7910-21.  
51  
52  
53  
54  
55 36. Hammond D, Reid JL. Exposure and perceptions of marketing for caffeinated energy  
56 drinks among young Canadians. *Public health nutrition.* 2018;21(3):535-42.  
57  
58  
59  
60

1  
2  
3  
4  
5  
6  
7  
8  
9  
10  
11  
12  
13  
14  
15  
16  
17  
18  
19  
20  
21  
22  
23  
24  
25  
26  
27  
28  
29  
30  
31  
32  
33  
34  
35  
36  
37  
38  
39  
40  
41  
42  
43  
44  
45  
46  
47  
48  
49  
50  
51  
52  
53  
54  
55  
56  
57  
58  
59  
60

37. Rothman K. J. Epidemiology: An Introduction. 2nd ed. New York: Oxford University Press; 2002.

For peer review only

1  
2  
3 **Footnote page**  
4  
5

6 **Abbreviations**  
7  
8

9 ED = Energy Drinks  
10

11  
12 EFSA = European Food Safety Authority  
13

14  
15 FAS II = Family Affluence Scale II  
16

17  
18 NFSA = Norwegian Ministry of Health, the Norwegian Food Safety Authority  
19

20  
21 RR = Relative Risk  
22

23  
24 SES = Socio-Economic Status  
25

26  
27 VKM = Norwegian Scientific Committee for Food and Environment  
28  
29

30  
31 **Acknowledgements:** The authors would like to thank NOVA (The Norwegian Social Research)  
32  
33 for granting access to the data from the «Ungdata, 2010-2019» surveys used in the present  
34  
35 study.  
36  
37

38  
39 **Contributors:** S.K. and M. H.-A., conceptualized the study, acquired the data and drafted the  
40  
41 manuscript; S.K., T. A. S., and M. H.-A., analyzed the data; All authors (S.K, M. H.-A., T. A. S.,  
42  
43 and B. S. S) contributed to writing the manuscript; All authors have read and approved the  
44  
45 final manuscript.  
46  
47

48  
49 **Funding:** The study was funded by Innlandet Hospital Trust (project number: 150377).  
50  
51

52  
53 **Ethical approval:** The annual Ungdata Survey is approved by the Norwegian Centre for  
54  
55 Research Data (NSD). Participants do not have unique identification numbers as data  
56  
57 collection is done anonymously and does not contain sensitive information. Therefore, no  
58  
59 ethical approval was needed.  
60

1  
2  
3 **Patient and public involvement:** There was no patient or public involvement in study.  
4  
5

6 **Data availability statement:** The data supporting our study is available from the Norwegian  
7  
8 Centre for Research Data (NSD) and were used under license for the current study. The  
9  
10 Ungdata survey is funded by The Norwegian Directorate of Health. Anonymous data has  
11  
12 been made available for the authors by NOVA through NSD – the Norwegian Center for  
13  
14 Research Data. Neither NOVA, The Norwegian Directorate of Health or NSD are responsible  
15  
16 for the analyses or interpretation of the presented data.  
17  
18  
19

20  
21 **Competing interest:** None declared  
22  
23

## 24 **Figures**

25  
26  
27 **Figure 1:** Overview of the Study Participants.  
28  
29

30  
31 **Figure 2:** Any ED Consumers per Year and Gender.  
32  
33

34 **Figure 3:** High ED Consumers per Year and Gender.  
35  
36  
37  
38  
39  
40  
41  
42  
43  
44  
45  
46  
47  
48  
49  
50  
51  
52  
53  
54  
55  
56  
57  
58  
59  
60





1  
2  
3  
4  
5  
6  
7  
8  
9  
10  
11  
12  
13  
14  
15  
16  
17  
18  
19  
20  
21  
22  
23  
24  
25  
26  
27  
28  
29  
30  
31  
32  
33  
34  
35  
36  
37  
38  
39  
40  
41  
42  
43  
44  
45  
46  
47  
48  
49  
50  
51  
52  
53  
54  
55  
56  
57  
58  
59  
60

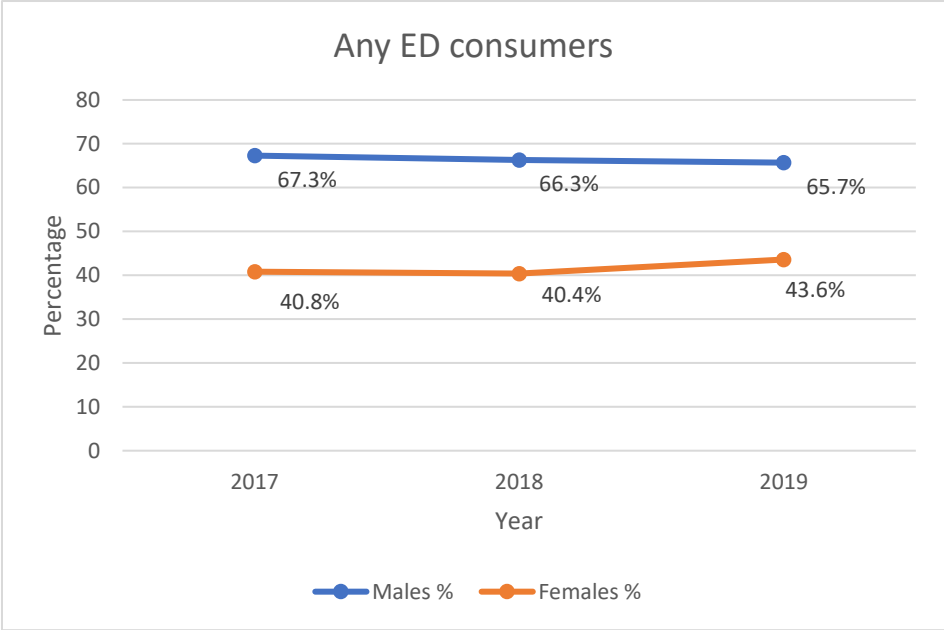

peer review only

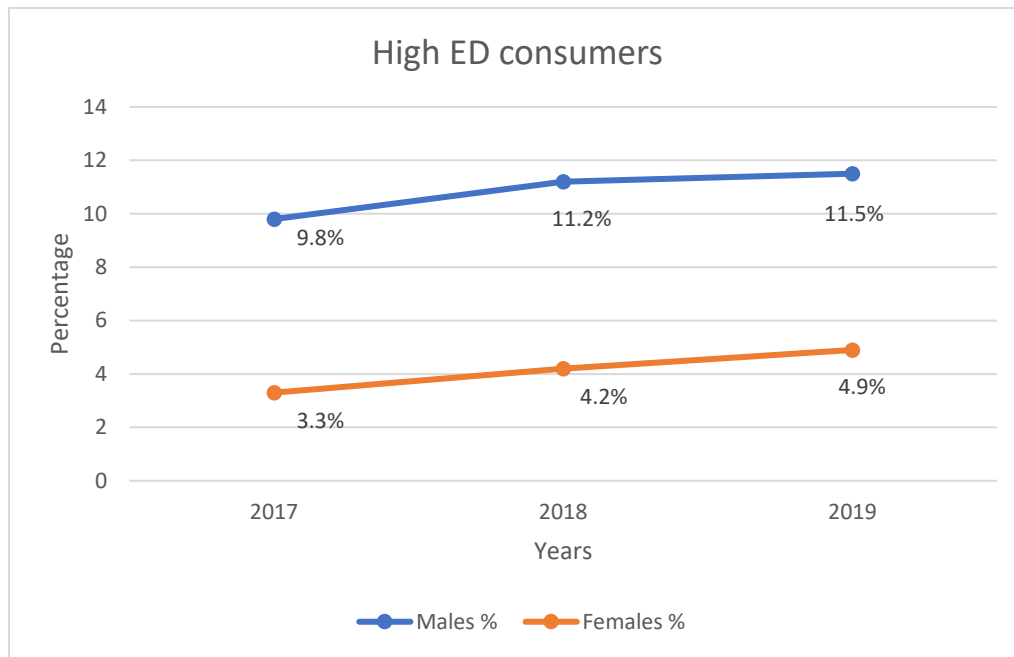

1  
2  
3  
4  
5  
6  
7  
8  
9  
10  
11  
12  
13  
14  
15  
16  
17  
18  
19  
20  
21  
22  
23  
24  
25  
26  
27  
28  
29  
30  
31  
32  
33  
34  
35  
36  
37  
38  
39  
40  
41  
42  
43  
44  
45  
46  
47  
48  
49  
50  
51  
52  
53  
54  
55  
56  
57  
58  
59  
60STROBE Statement—Checklist of items that should be included in reports of *cross-sectional studies*

|                              | Item No | Recommendation                                                                                                                                                                                               | Page No |
|------------------------------|---------|--------------------------------------------------------------------------------------------------------------------------------------------------------------------------------------------------------------|---------|
| <b>Title and abstract</b>    | 1       | (a) Indicate the study's design with a commonly used term in the title or the abstract                                                                                                                       | 0       |
|                              |         | (b) Provide in the abstract an informative and balanced summary of what was done and what was found                                                                                                          | 0       |
| <b>Introduction</b>          |         |                                                                                                                                                                                                              |         |
| Background/rationale         | 2       | Explain the scientific background and rationale for the investigation being reported                                                                                                                         | 1-3     |
| Objectives                   | 3       | State specific objectives, including any prespecified hypotheses                                                                                                                                             | 3       |
| <b>Methods</b>               |         |                                                                                                                                                                                                              |         |
| Study design                 | 4       | Present key elements of study design early in the paper                                                                                                                                                      | 0+4     |
| Setting                      | 5       | Describe the setting, locations, and relevant dates, including periods of recruitment, exposure, follow-up, and data collection                                                                              | 0+4     |
| Participants                 | 6       | (a) Give the eligibility criteria, and the sources and methods of selection of participants                                                                                                                  | 5       |
| Variables                    | 7       | Clearly define all outcomes, exposures, predictors, potential confounders, and effect modifiers. Give diagnostic criteria, if applicable                                                                     | 5-7     |
| Data sources/<br>measurement | 8*      | For each variable of interest, give sources of data and details of methods of assessment (measurement). Describe comparability of assessment methods if there is more than one group                         | 5-7     |
| Bias                         | 9       | Describe any efforts to address potential sources of bias                                                                                                                                                    | 5       |
| Study size                   | 10      | Explain how the study size was arrived at                                                                                                                                                                    | 5       |
| Quantitative variables       | 11      | Explain how quantitative variables were handled in the analyses. If applicable, describe which groupings were chosen and why                                                                                 | 5-7     |
| Statistical methods          | 12      | (a) Describe all statistical methods, including those used to control for confounding                                                                                                                        | 7       |
|                              |         | (b) Describe any methods used to examine subgroups and interactions                                                                                                                                          | 7       |
|                              |         | (c) Explain how missing data were addressed                                                                                                                                                                  | 5       |
|                              |         | (d) If applicable, describe analytical methods taking account of sampling strategy                                                                                                                           | NA      |
|                              |         | (e) Describe any sensitivity analyses                                                                                                                                                                        | 7       |
| <b>Results</b>               |         |                                                                                                                                                                                                              |         |
| Participants                 | 13*     | (a) Report numbers of individuals at each stage of study—eg numbers potentially eligible, examined for eligibility, confirmed eligible, included in the study, completing follow-up, and analysed            | 9       |
|                              |         | (b) Give reasons for non-participation at each stage                                                                                                                                                         | 5       |
|                              |         | (c) Consider use of a flow diagram                                                                                                                                                                           | 5       |
| Descriptive data             | 14*     | (a) Give characteristics of study participants (eg demographic, clinical, social) and information on exposures and potential confounders                                                                     | 9       |
|                              |         | (b) Indicate number of participants with missing data for each variable of interest                                                                                                                          | 9       |
| Outcome data                 | 15*     | Report numbers of outcome events or summary measures                                                                                                                                                         | 9-10    |
| Main results                 | 16      | (a) Give unadjusted estimates and, if applicable, confounder-adjusted estimates and their precision (eg, 95% confidence interval). Make clear which confounders were adjusted for and why they were included | 10-15   |

|                          |    |                                                                                                                                                                            |       |
|--------------------------|----|----------------------------------------------------------------------------------------------------------------------------------------------------------------------------|-------|
|                          |    | (b) Report category boundaries when continuous variables were categorized                                                                                                  | 10-15 |
|                          |    | (c) If relevant, consider translating estimates of relative risk into absolute risk for a meaningful time period                                                           |       |
| Other analyses           | 17 | Report other analyses done—eg analyses of subgroups and interactions, and sensitivity analyses                                                                             | 11-12 |
| <b>Discussion</b>        |    |                                                                                                                                                                            |       |
| Key results              | 18 | Summarise key results with reference to study objectives                                                                                                                   | 17    |
| Limitations              | 19 | Discuss limitations of the study, taking into account sources of potential bias or imprecision. Discuss both direction and magnitude of any potential bias                 | 18-19 |
| Interpretation           | 20 | Give a cautious overall interpretation of results considering objectives, limitations, multiplicity of analyses, results from similar studies, and other relevant evidence | 17-19 |
| Generalisability         | 21 | Discuss the generalisability (external validity) of the study results                                                                                                      | 18-19 |
| <b>Other information</b> |    |                                                                                                                                                                            |       |
| Funding                  | 22 | Give the source of funding and the role of the funders for the present study and, if applicable, for the original study on which the present article is based              | 4-5   |

\*Give information separately for exposed and unexposed groups.

**Note:** An Explanation and Elaboration article discusses each checklist item and gives methodological background and published examples of transparent reporting. The STROBE checklist is best used in conjunction with this article (freely available on the Web sites of PLoS Medicine at <http://www.plosmedicine.org/>, Annals of Internal Medicine at <http://www.annals.org/>, and Epidemiology at <http://www.epidem.com/>). Information on the STROBE Initiative is available at [www.strobe-statement.org](http://www.strobe-statement.org).

# BMJ Open

## Social Determinants and Changes in Energy Drink Consumption among Adolescents in Norway, 2017-2019: A Cross-sectional Study

|                                 |                                                                                                                                                                                                                                                                                                                                                                                                                                                                                                                                                                                                                                                                 |
|---------------------------------|-----------------------------------------------------------------------------------------------------------------------------------------------------------------------------------------------------------------------------------------------------------------------------------------------------------------------------------------------------------------------------------------------------------------------------------------------------------------------------------------------------------------------------------------------------------------------------------------------------------------------------------------------------------------|
| Journal:                        | <i>BMJ Open</i>                                                                                                                                                                                                                                                                                                                                                                                                                                                                                                                                                                                                                                                 |
| Manuscript ID                   | bmjopen-2021-049284.R3                                                                                                                                                                                                                                                                                                                                                                                                                                                                                                                                                                                                                                          |
| Article Type:                   | Original research                                                                                                                                                                                                                                                                                                                                                                                                                                                                                                                                                                                                                                               |
| Date Submitted by the Author:   | 22-Jul-2021                                                                                                                                                                                                                                                                                                                                                                                                                                                                                                                                                                                                                                                     |
| Complete List of Authors:       | Kaldenbach, Siri; Sykehuset Innlandet HF, Department of Paediatric and Adolescent Medicine, Innlandet Hospital Trust; University of Oslo Faculty of Medicine, Clinical Medicine<br>Strand, Tor A.; Sykehuset Innlandet HF, Research Department, Innlandet Hospital Trust; University of Bergen Centre for International Health<br>Solvik, Beate; Sykehuset Innlandet HF, Women's Clinic, Innlandet Hospital Trust; University of Bergen Centre for International Health<br>Holten-Andersen, Mads; Sykehuset Innlandet HF, Department of Paediatric and Adolescent Medicine, Innlandet Hospital Trust; University of Oslo Faculty of Medicine, Clinical Medicine |
| <b>Primary Subject Heading</b>: | Public health                                                                                                                                                                                                                                                                                                                                                                                                                                                                                                                                                                                                                                                   |
| Secondary Subject Heading:      | Epidemiology, Nutrition and metabolism                                                                                                                                                                                                                                                                                                                                                                                                                                                                                                                                                                                                                          |
| Keywords:                       | NUTRITION & DIETETICS, Community child health < PAEDIATRICS, PUBLIC HEALTH                                                                                                                                                                                                                                                                                                                                                                                                                                                                                                                                                                                      |
|                                 |                                                                                                                                                                                                                                                                                                                                                                                                                                                                                                                                                                                                                                                                 |

SCHOLARONE™  
Manuscripts



I, the Submitting Author has the right to grant and does grant on behalf of all authors of the Work (as defined in the below author licence), an exclusive licence and/or a non-exclusive licence for contributions from authors who are: i) UK Crown employees; ii) where BMJ has agreed a CC-BY licence shall apply, and/or iii) in accordance with the terms applicable for US Federal Government officers or employees acting as part of their official duties; on a worldwide, perpetual, irrevocable, royalty-free basis to BMJ Publishing Group Ltd ("BMJ") its licensees and where the relevant Journal is co-owned by BMJ to the co-owners of the Journal, to publish the Work in this journal and any other BMJ products and to exploit all rights, as set out in our [licence](#).

The Submitting Author accepts and understands that any supply made under these terms is made by BMJ to the Submitting Author unless you are acting as an employee on behalf of your employer or a postgraduate student of an affiliated institution which is paying any applicable article publishing charge ("APC") for Open Access articles. Where the Submitting Author wishes to make the Work available on an Open Access basis (and intends to pay the relevant APC), the terms of reuse of such Open Access shall be governed by a Creative Commons licence – details of these licences and which [Creative Commons](#) licence will apply to this Work are set out in our licence referred to above.

Other than as permitted in any relevant BMJ Author's Self Archiving Policies, I confirm this Work has not been accepted for publication elsewhere, is not being considered for publication elsewhere and does not duplicate material already published. I confirm all authors consent to publication of this Work and authorise the granting of this licence.

**Title page****Title: Social Determinants and Changes in Energy Drink Consumption among Adolescents  
in Norway, 2017-2019: A Cross-sectional Study**

Siri Kaldenbach<sup>1, 2</sup>, Tor A. Strand<sup>3, 4</sup>, Beate Stokke Solvik<sup>4, 5</sup>, Mads Holten-Andersen<sup>1, 2</sup>

**Author's information**

Corresponding author: Siri Kaldenbach

Address: Anders Sandvigsgate 17, 2609 Lillehammer, Norway.

Email: [siri.kaldenbach@sykehuset-innlandet.no](mailto:siri.kaldenbach@sykehuset-innlandet.no)

Telephone: +4741086031

**Departments**

1. Sykehuset Innlandet HF, Department of Paediatric and Adolescent Medicine, Innlandet Hospital Trust  
Lillehammer, NO
2. University of Oslo, Institute of Clinical Medicine  
Oslo, NO  
+4741086031

**Co-authors**

Tor A. Strand

3. Sykehuset Innlandet HF, Research Department, Innlandet Hospital Trust  
Lillehammer, NO  
+4790971086
4. University of Bergen, Centre for International Health  
Bergen, NO  
+4790971086

Beate Stokke Solvik

5. Sykehuset Innlandet HF, Women's Clinic, Innlandet Hospital Trust  
Lillehammer, NO  
+4793292801
4. University of Bergen, Center for International Health  
Bergen, NO  
+4793292801

1  
2  
3 Mads Holten-Andersen  
4

- 5 1. Sykehuset Innlandet HF, Department of Paediatric and Adolescent Medicine,  
6 Innlandet Hospital Trust  
7 Lillehammer, NO  
8 +4741487829  
9  
10 2. University of Oslo, Institute of Clinical Medicine  
11 Oslo, NO  
12 +4741487829  
13  
14  
15

16  
17 **Word count abstract: 239**  
18

19  
20 **Word count: 3267**  
21  
22  
23  
24  
25  
26  
27  
28  
29  
30  
31  
32  
33  
34  
35  
36  
37  
38  
39  
40  
41  
42  
43  
44  
45  
46  
47  
48  
49  
50  
51  
52  
53  
54  
55  
56  
57  
58  
59  
60



1  
2  
3 **Social Determinants and Changes in Energy Drink Consumption among Adolescents in**  
4  
5 **Norway, 2017-2019: A Cross-sectional Study**  
6  
7

8 **Objectives:** To describe the social determinants and development in energy drink  
9  
10 consumption among Norwegian adolescents in 2017, 2018 and 2019.  
11  
12

13  
14 **Design:** Cross-sectional, online, annual, nationwide surveys (Ungdata).  
15  
16

17 **Setting:** Responses collected online from January 2017 to December 2019.  
18  
19

20 **Participants:** Lower- and upper secondary school students (n=297,102) aged 12-19 years  
21  
22 who responded in 2017, 2018, and 2019.  
23  
24

25 **Main outcome measures:** Frequency of energy drink consumption.  
26  
27

28  
29 **Results:** Over the three-year period, 66.4% of the males and 41.8% of the females had  
30  
31 consumed energy drink once a week or more. The proportion of female high consumers  
32  
33 (consuming energy drink more than 4 times a week) increased from 3.3% to 4.9% between  
34  
35 2017 and 2019; for males, the increase was from 9.8% to 11.5%. In females the proportion of  
36  
37 high consumers increased with 24% (relative risk (RR); CI) (1.24; 1.09, 1.41) from 2017 to  
38  
39 2018, and 46% (1.46; 1.31, 1.62) from 2017 to 2019. The corresponding increases in males  
40  
41 were 10% (1.10; 1.01, 1.20) from 2017 to 2018, and 12% (1.12; 1.05, 1.19) from 2017to  
42  
43 2019. Any energy drink consumption as well as high energy drink consumption were  
44  
45 independently associated with school level, less central residency, low socioeconomic status,  
46  
47 physical inactivity, and high leisure screen time.  
48  
49  
50  
51

52  
53  
54 **Conclusion:** We found an increase in high consumers among both boys and girls between  
55  
56 2017 and 2019. The observed increase in energy drink consumption among adolescents can  
57  
58 explain some of the increased sales of energy drink in Norway.  
59  
60

## Article summary

### Strengths and limitations of this study:

- This study identifies recent development in the frequency of energy drink consumption among adolescents in Norway.
- Data are derived from a large, annual, national survey in Norway including nearly 300,000 adolescents over three years from 2017 to 2019.
- The study relies on self-reported energy drink consumption, which can be susceptible to both recall bias and social desirability bias.

## INTRODUCTION

Marketed as a booster of mental and physical capacity, energy drinks (ED) have gained worldwide popularity. In Norway, ED sales increased by more than 50% from 2017 to 2019.<sup>(1)</sup> ED are defined as non-alcoholic beverages that contain at least 150 mg caffeine per litre, in addition to sugar combined with one or more substances known to have stimulant properties.<sup>(2-4)</sup> Moreover, vitamins, minerals, and amino acids are frequently added to ED.<sup>(4)</sup> ED marketing is often targeted toward athletes and the adolescent population, and recent studies have shown that viewers of TV-channels with greater ED advertising have increased odds of ED consumption.<sup>(5-7)</sup>

ED consumption among children and adolescents has been linked to potential negative effects such as increased cardiovascular symptoms with increased cardiac output, but also elevated systolic and diastolic blood pressure.<sup>(8)</sup> Moreover, sleep disturbance, nervousness, and headache have been reported.<sup>(9-12)</sup> These potential adverse effects can result in tiredness, inattention, reduced school performance, and increased mental distress. The main cause for concern is the high level of caffeine in ED combined with added sugar and sweet flavour, next to the high content of stimulating substances.<sup>(13)</sup> According to Iversen et. al, this combination of ingredients may cause faster uptake of caffeine into the circulation compared to regular coffee.<sup>(13)</sup> Moreover, studies have indicated that adding caffeine to sugar-sweetened beverages (SSB) leads to increased use of SSB, which in turn results in increased energy intake.<sup>(14, 15)</sup> The high energy intake may contribute to overweight and obesity, as well as dental caries due to the high sugar and citric acid content of ED and SSB.<sup>(16)</sup>

1  
2  
3 In 2013, the European Food Safety Authority (EFSA) published a report on ED use, indicating  
4 that children and adolescents aged 10-18 years had the highest reported consumption  
5 (68%), compared with adults above 18 years (30%) and children below 10 years (18%).(3)  
6  
7

8  
9  
10 The potential negative effects of ED in children and adolescents have gained the attention of  
11 government authorities in several countries, of which some have issued restrictions on the  
12 caffeine content in ED.(17) The Norwegian Food Safety Authority (NFSA) has stated that the  
13 daily intake of caffeine for children and adolescents should not exceed 2.5 mg/kg. This was  
14 decided based on a review of current knowledge by the Norwegian Scientific Committee for  
15 Food and Environment (VKM).(4)  
16  
17

18 According to the findings of the VKM review, a child or youth would be at risk of sleep  
19 disturbance with an intake of 1.4 mg/kg body weight/day of caffeine.(4) Furthermore, the  
20 risk of negative health effects on the heart and central nervous system would be present at  
21 an intake of 3 mg/kg body weight/day of caffeine. This would mean that a 13-15 years old  
22 adolescent with an average weight of 50 kg would be at risk of sleep disturbance when  
23 drinking more than 70 mg/day of caffeine and at risk of adverse cardiac and central  
24 neurologic effects at daily consumption of 150 mg/day. These values are in line with  
25 recommendations by EFSA and correspond to an intake of one to two large cans (500ml) of  
26 ED for an adolescent described above.(4)  
27  
28

29 ED consumption varies according to age and gender. Several studies have found that male  
30 adolescents are more likely to consume ED than their female counterparts. Moreover, young  
31 (male) adolescents at middle school level have a higher ED consumption compared to older  
32 adolescents at high school level.(3, 18, 19) Furthermore, Degirmenci et al. found that high  
33 consumption (> 4 times a week) of ED was independently associated with male gender,  
34  
35  
36  
37  
38  
39  
40  
41  
42  
43  
44  
45  
46  
47  
48  
49  
50  
51  
52  
53  
54  
55  
56  
57  
58  
59  
60

1  
2  
3 physical inactivity, high leisure screen time, low socioeconomic status, and rural  
4  
5 residency.(20)

6  
7  
8 Of special concern for potential adverse effects are children and adolescents who have lower  
9  
10 body weight, and are more sensitive to ED stimulants, including caffeine. According to the  
11  
12 American Academy of Pediatrics, “Caffeine and other stimulants contained in energy drinks  
13  
14 have no place in the diet of children and adolescents”.(21) Despite the aforementioned  
15  
16 increased sales of ED in Norway, the extent to which the consumption of ED among children  
17  
18 and adolescents followed this development remains unclear.(17) The objective of the  
19  
20 current study is to describe the social determinants and changes in energy drink  
21  
22 consumption among Norwegian adolescents in 2017, 2018, and 2019. Potential social  
23  
24 determinants include age, gender, socio-economic status (SES), residency, physical activity,  
25  
26 and leisure screen time.  
27  
28  
29  
30  
31  
32  
33  
34  
35  
36  
37  
38  
39  
40  
41  
42  
43  
44  
45  
46  
47  
48  
49  
50  
51  
52  
53  
54  
55  
56  
57  
58  
59  
60

## METHODS

### Study design and participants

Data for the study was collected through the Ungdata survey, a national, annual, survey, mapping the health and well-being of lower and upper secondary school students in Norway. The study was approved by the Norwegian Centre for Research Data. Detailed information regarding the survey can be found on [www.ungdata.no](http://www.ungdata.no).<sup>(22)</sup> All data collection is conducted anonymously and web-based during school hours with the teacher present in the classroom. Data from the surveys carried out in 2017, 2018, and 2019 were used for the present study.

All 422 municipalities in Norway (2019) are invited to participate in the Ungdata survey. Participation is free of charge and on a volunteer basis. The municipalities are encouraged to perform the survey every three years in the schools of the municipalities. This is to ensure that all adolescents get to participate once both during lower (8<sup>th</sup> to 10<sup>th</sup> grade) and upper (11<sup>th</sup> to 13<sup>th</sup> grade) secondary school. The three-year interval is not a strict rule, which means that some municipalities participated twice and some all three years (2017-2019). In the present study, information from all municipalities was included regardless of how many years they participated. It is therefore possible that some adolescents responded twice or thrice. In total, we have data from 422 municipalities, 333 participated only once, 59 twice, and one municipality participated all three years. Fewer municipalities participated in the Ungdata survey in 2018, compared to 2017 and 2019 (Figure 1).

In Norway, children start school the year they turn six years old (grade 1) and stay in school until the age of 15-16 years (grade 10). Attending school is obligatory by law until the completion of grade 10 whereas attending subsequent grades is voluntary. National

1  
2  
3 statistics show that the majority of 16- to 18-year-old (93.4% in 2019) go on to attend upper  
4  
5 secondary schools.(23)  
6  
7

8  
9 A total of 297,102 adolescents from both lower and upper secondary schools participated in  
10  
11 the Ungdata surveys in 2017, 2018, and 2019. Of the participating adolescents, 278,891  
12  
13 answered the questions on ED consumption (response rate of 93.9%) and were included in  
14  
15 the analyses (Figure 1).  
16  
17

18  
19 In 2017, missing values for gender were 6.4% compared to less than 1% in 2018 and 2019.

20  
21 This is likely due to the order of questions in the electronic questionnaire, which led to  
22  
23 overlooking of the question regarding gender in the 2017 survey. This ordering of questions  
24  
25 was changed in 2018 and 2019 (personal correspondence with staff from Ungdata).  
26  
27

28  
29 The annual Ungdata Survey is approved by the Norwegian Centre for Research Data (NSD).

30  
31 Participants do not have unique identification numbers as data collection is done  
32  
33 anonymously and does not contain sensitive information. Therefore, no ethical approval was  
34  
35 needed. The study was funded by Innlandet Hospital Trust (project number: 150377).  
36  
37  
38  
39

## 40 **Measures**

41  
42  
43 ED consumption was assessed with the question “How often do you usually drink energy  
44  
45 drinks (Red Bull, Battery, etc.)?” The participants could respond with one of seven  
46  
47 incremental options, ranging from “never” to “several times a day”. The response to this  
48  
49 question was used to categorize adolescents into the following two groups subsequently  
50  
51 used as outcome variables: ED consumers (ED < once a week or more) and high ED  
52  
53 consumers (ED ≥ 4 times a week). The definition of high ED consumers was based on  
54  
55 previous studies.(2, 20) The ED consumers were compared to never ED consumers, and the  
56  
57  
58  
59  
60

1  
2  
3 high ED consumers were compared to the rest (all other frequency of ED consumption  
4  
5 including non-ED).  
6  
7

8  
9 Leisure screen time was assessed using the question “Outside school, how much time do you  
10  
11 normally spend on activities that involve looking at a screen (TV, computer, tablet, mobile  
12  
13 phone) each day?” with options on a seven-point incremental scale ranging from “no time”  
14  
15 to “≥ 6 hours”. The first three options of the variable leisure screen-time were merged into  
16  
17 one response of “≤ 2 hours” for the regression analysis due to the relatively low number of  
18  
19 respondents in these categories.  
20  
21  
22

23  
24 Physical activity was assessed by the question “How often do you perform physical activity  
25  
26 which gets you out of breath or makes you sweaty?” with options on a six-point incremental  
27  
28 scale ranging from “never” to “at least five times a week”.  
29  
30

31  
32 SES was assessed according to a five-point scale which again was based on a compound  
33  
34 score from three different dimensions.(24, 25) These dimensions were: parental education,  
35  
36 “culture capital” at home based on the question “how many books do you think there are in  
37  
38 your home?”, and the third dimension used four questions from the Family Affluence Scale  
39  
40 (FAS II). FAS II contains questions regarding the number of cars in the family, whether the  
41  
42 participant has her/his own bedroom, whether the participant has been on vacation, and the  
43  
44 number of computers or tablets in the house. The answers were assigned different points  
45  
46 that were subsequently used to calculate a total score distributed into five equally sized  
47  
48 groups. Group 1 refers to the lowest SES-score and group 5 to the highest.  
49  
50  
51  
52

53  
54 For this study, we used the official Norwegian centrality index to define residency. According  
55  
56 to Statistics Norway, centrality refers to an index of travel time to workplaces and service  
57  
58 functions from all populated basic units. Groups 1 contains the most central municipalities  
59  
60



1  
2  
3 (highest index) and group 6 the least central (lowest index).(26) Residency for each  
4  
5 individual is based on where the adolescent attends school and is not per se the place of  
6  
7 living.  
8  
9

10  
11 Further details on variables and answer options are given in Table 1.  
12  
13

### 14 **Statistical analyses**

15  
16  
17 The association between the outcome variables (any and high ED consumption) and the  
18  
19 independent variables were estimated in multivariable Poisson regression models. These  
20  
21 models allowed us to estimate the risk ratios (RR) between the categories of the  
22  
23 independent variables.(27-29) We used the sandwich estimation method to generate robust  
24  
25 standard errors.(27) We also included interaction terms between year and gender to  
26  
27 estimate the extent to which these variables modified each other's association with the  
28  
29 outcomes. In other words, we assessed if the association between gender and energy drinks  
30  
31 differed by year and the extent to which the association between year and the consumption  
32  
33 of ED differed by gender. The independent variables in the statistical models were decided *a*  
34  
35 *priori* and consisted of: gender, year, grade, residency, SES, frequency of physical activity and  
36  
37 leisure screen time. We adjusted the standard errors for clustering within the municipalities.  
38  
39  
40  
41  
42  
43  
44

45 The interactions terms between gender and year were estimated both on an additive and a  
46  
47 multiplicative scale using generalized linear models with identity and log link,  
48  
49 respectively.(30) In these models we estimated the significance of the interaction terms  
50  
51 using likelihood ratio tests. STATA version 15.1 (College Station, Texas) was used for all  
52  
53 statistical analysis.(31)  
54  
55  
56

### 57 **Patient and public involvement**

58  
59  
60

1  
2  
3  
4  
5  
6  
7  
8  
9  
10  
11  
12  
13  
14  
15  
16  
17  
18  
19  
20  
21  
22  
23  
24  
25  
26  
27  
28  
29  
30  
31  
32  
33  
34  
35  
36  
37  
38  
39  
40  
41  
42  
43  
44  
45  
46  
47  
48  
49  
50  
51  
52  
53  
54  
55  
56  
57  
58  
59  
60

There were no patients involved in the study.

For peer review only

## RESULTS

In total, 278,891 adolescents who participated in Ungdata answered the question about ED use and were included for further analyses. Most of the adolescents (57.5%) attended lower secondary school (Table 1). Grade thirteen was the least represented grade in the sample, which is in line with previous findings from the Ungdata survey.(24)

Most of the participants attended schools in municipalities with the centrality index two and three. The distribution seen in Table 1 is comparable to the overall distribution of the centrality index in Norway.(32) A lesser percentage in level six was expected, as there are fewer schools in these areas.

*Table 1. Baseline Characteristics of Adolescents participating in the Ungdata surveys in 2017, 2018 and 2019.*

| VARIABLE               | TOTAL (%)      | 2017 (%)      | 2018 (%)      | 2019 (%)      |
|------------------------|----------------|---------------|---------------|---------------|
| <b>N</b>               | 278,891        | 101,997       | 66,017        | 110,877       |
| <b>SCHOOL LEVEL</b>    |                |               |               |               |
| <i>LOWER SECONDARY</i> | 160,352 (57.5) | 61,768 (60.6) | 38,256 (57.9) | 60,328 (54.4) |
| <i>UPPER SECONDARY</i> | 118,539 (42.5) | 40,229 (39.4) | 27,761 (42.1) | 50,549 (45.6) |
| <b>GRADE</b>           |                |               |               |               |
| <i>8</i>               | 52,984 (19.0)  | 20,381 (20.0) | 12,695 (19.2) | 19,908 (18.0) |
| <i>9</i>               | 51,393 (18.4)  | 19,514 (19.1) | 12,558 (19.0) | 19,321 (17.4) |
| <i>10</i>              | 50,547 (18.1)  | 19,632 (19.2) | 11,687 (17.7) | 19,228 (17.3) |
| <i>11</i>              | 50,972 (18.3)  | 18,580 (18.2) | 11,190 (16.9) | 21,202 (19.1) |
| <i>12</i>              | 40,391 (14.5)  | 12,824 (12.6) | 9360 (14.2)   | 18,207 (16.4) |
| <i>13</i>              | 26,351 (9.5)   | 8632 (8.5)    | 7091 (10.7)   | 10,628 (9.6)  |
| <i>MISSING</i>         | 6253 (2.2)     | 2434 (2.4)    | 1436 (2.2)    | 2383 (2.2)    |
| <b>GENDER</b>          |                |               |               |               |
| <i>FEMALE</i>          | 138,218 (49.6) | 47,218 (46.3) | 31,802 (48.2) | 54,020 (48.7) |
| <i>MALE</i>            | 133,040 (47.7) | 48,254 (47.3) | 33,908 (51.4) | 56,056 (50.6) |

|                                       |                |               |               |               |
|---------------------------------------|----------------|---------------|---------------|---------------|
| <i>MISSING</i>                        | 7633 (2.7)     | 6525 (6.4)    | 307 (0.5)     | 801 (0.7)     |
| <b>RESIDENCY</b>                      |                |               |               |               |
| <i>1</i>                              | 56,012 (20.2)  | 14,909 (14.7) | 22,358 (34.0) | 18,745 (16.9) |
| <i>2</i>                              | 63,413 (22.8)  | 30,793 (30.5) | 5601 (8.5)    | 27,019 (24.4) |
| <i>3</i>                              | 74,853 (26.9)  | 23,190 (22.9) | 16,117 (25.5) | 35,546 (32.1) |
| <i>4</i>                              | 46,826 (16.9)  | 16,688 (16.5) | 11,286 (17.1) | 18,852 (17.0) |
| <i>5</i>                              | 27,900 (10.0)  | 12,358 (12.2) | 7609 (11.6)   | 7933 (7.1)    |
| <i>6</i>                              | 8847 (3.2)     | 3195 (3.2)    | 2870 (4.4)    | 2782 (2.5)    |
| <b>FREQUENCY OF PHYSICAL ACTIVITY</b> |                |               |               |               |
| <i>NEVER</i>                          | 4518 (1.6)     | 1374 (1.3)    | 1218 (1.8)    | 1926 (1.7)    |
| <i>SELDOM</i>                         | 19,642 (7.0)   | 6314 (6.2)    | 4997 (7.6)    | 8331 (7.5)    |
| <i>1-2 TIMES A MONTH</i>              | 18,007 (6.5)   | 6105 (6.0)    | 4709 (7.1)    | 7193 (6.5)    |
| <i>1-2 TIMES A WEEK</i>               | 75,687 (27.1)  | 26,901 (26.4) | 18,484 (28.0) | 30,302 (27.3) |
| <i>3-4 TIMES A WEEK</i>               | 89,537 (32.1)  | 33,164 (32.5) | 20,458 (31.0) | 35,915 (32.4) |
| <i>≥ 5 TIMES A WEEK</i>               | 65,897 (23.6)  | 25,472 (25.0) | 14,402 (21.8) | 26,023 (23.5) |
| <i>MISSING</i>                        | 5603 (2.0)     | 2667 (2.6)    | 1749 (2.7)    | 1187 (1.1)    |
| <b>LEISURE SCREEN TIME</b>            |                |               |               |               |
| <i>NO TIME</i>                        | 2489 (0.9)     | 1015 (1.0)    | 630 (1.0)     | 844 (0.8)     |
| <i>≤ 1 HOUR DAILY</i>                 | 8261 (3.0)     | 3499 (3.4)    | 2049 (3.1)    | 2713 (2.5)    |
| <i>1-2 2 HOURS DAILY</i>              | 32,484 (11.6)  | 13,220 (13.0) | 7676 (11.6)   | 11,588 (10.4) |
| <i>2-3 HOURS DAILY</i>                | 60,567 (21.7)  | 22,786 (22.3) | 14,284 (21.6) | 23,497 (21.2) |
| <i>3-4 HOURS DAILY</i>                | 75,781 (27.2)  | 27,296 (26.8) | 17,654 (26.7) | 30,831 (27.8) |
| <i>4-6 HOURS DAILY</i>                | 59,250 (21.2)  | 20,379 (20.0) | 13,878 (21.0) | 24,993 (22.5) |
| <i>≥ 6 HOURS DAILY</i>                | 36,168 (13.0)  | 12,563 (12.3) | 8873 (13.4)   | 14,732 (13.3) |
| <i>MISSING</i>                        | 3891 (1.4)     | 1239 (1.2)    | 973 (1.5)     | 1679 (1.5)    |
| <b>ENERGY DRINKS CONSUMPTION</b>      |                |               |               |               |
| <i>NEVER</i>                          | 128,365 (46.0) | 46,782 (45.9) | 31,055 (47.0) | 50,528 (45.6) |
| <i>&lt; ONCE A WEEK</i>               | 71,200 (25.5)  | 27,530 (27.0) | 16,594 (25.1) | 27,076 (24.4) |
| <i>ONCE A WEEK</i>                    | 29,653 (10.6)  | 10,936 (10.7) | 6784 (10.3)   | 11,933 (10.8) |

|                     |               |              |             |               |
|---------------------|---------------|--------------|-------------|---------------|
| 2-3 TIMES A WEEK    | 28,974 (10.4) | 10,065 (9.9) | 6595 (10.0) | 12,314 (11.1) |
| 4-6 TIMES A WEEK    | 12,310 (4.4)  | 4038 (4.0)   | 2843 (4.3)  | 5429 (4.9)    |
| EVERY DAY           | 4080 (1.5)    | 1250 (1.2)   | 1005 (1.5)  | 1825 (1.6)    |
| SEVERAL TIMES A DAY | 4309 (1.5)    | 1396 (1.4)   | 1141 (1.7)  | 1772 (1.6)    |

Between 20-30% of the participants reported performing some kind of physical activity where they get sweaty either 1-2, 3-4, or more than 5 times a week, while less than 10% reported 1-2 times a month or less. In addition, more than 10% spent 6 hours or more looking at a screen. Overall, 46% of the participants had never consumed ED and 7.4% had consumed ED more than 4 times a week.

Over the three years, there was a small decrease in the percentage of boys consuming ED from 67.3% (CI: 66.9-67.7) in 2017 to 65.7% (CI: 65.3-66-1) in 2019. Among girls, a small increase was found from 40.8% (CI: 40.4-41.3) in 2017 to 43.6% (CI: 43.1-44.0) in 2019 (Figure 2). However, high ED consumers increased among both boys and girls (Figure 3). In 2017, 9.8% (CI: 9.5-10.0) of the boys and 3.3% (CI: 3.1-3.4) of the girls reported ED consumption in the range of high consumers, while these percentages increased to 11.5% (CI: 11.2-11.7) in boys and 4.9% (CI: 4.7-5.1) in girls in 2019.

Table 2 shows the annual increase in high ED consumption among both boys and girls. The proportion of female high ED consumers increased by 46% over the period. That is, the proportion of female high consumers increased by 24% (RR; CI) (1.24; 1.09, 1.41) from 2017 to 2018, and by 46% (1.46; 1.31, 1.62) from 2017 to 2019. There was also an increase in the proportion of high consumers of ED in boys, however, this increase was lower at 12% (1.12; 1.05, 1.19) from 2017 to 2019. On a multiplicative scale, the interaction terms between gender and year were statistically significant for 2019 (Table 2). However, on an additive scale there was no interaction found according to the generalized linear models as the

1  
2  
3 difference in percentage points was almost identical (1.7 in boys and 1.6 in girls). Table 2  
4  
5 demonstrates the results from the Poisson regression models adjusted for clustering of  
6  
7 municipalities. As no substantial differences between the crude and adjusted estimates from  
8  
9 the Poisson regression models were found, only adjusted results are shown.  
10  
11  
12  
13  
14  
15  
16  
17  
18  
19  
20  
21  
22  
23  
24  
25  
26  
27  
28  
29  
30  
31  
32  
33  
34  
35  
36  
37  
38  
39  
40  
41  
42  
43  
44  
45  
46  
47  
48  
49  
50  
51  
52  
53  
54  
55  
56  
57  
58  
59  
60

For peer review only

Table 2. Determinants for being energy drink consumers (any ED or high ED) in Norwegian adolescents.

| VARIABLE                                                                       | TOTAL SAMPLE |        |      | ED CONSUMERS |            | HIGH ED CONSUMERS |      |      |            |
|--------------------------------------------------------------------------------|--------------|--------|------|--------------|------------|-------------------|------|------|------------|
|                                                                                | n            | n      | %    | RR           | 95% CI     | n                 | %    | RR   | 95% CI     |
| <b>INTERACTION TERMS</b>                                                       |              |        |      | 1            |            |                   |      | 1    |            |
| <i>INTERACTION GENDER AND YEAR - 2018</i>                                      |              |        |      | 0.99         | 0.90, 1.10 |                   |      | 0.89 | 0.78, 1.01 |
| <i>INTERACTION GENDER AND YEAR - 2019</i>                                      |              |        |      | 0.91         | 0.89, 0.94 |                   |      | 0.77 | 0.69, 0.84 |
| <b>SUBGROUPS</b>                                                               |              |        |      |              |            |                   |      |      |            |
| <b>YEAR</b>                                                                    |              |        |      |              |            |                   |      |      |            |
| <i>2017 FEMALE</i>                                                             | 48,254       | 19,700 | 40.8 | 1            |            | 1571              | 3.3  | 1    |            |
| <i>2018 FEMALE</i>                                                             | 33,908       | 13,702 | 40.4 | 0.98         | 0.91, 1.06 | 1410              | 4.2  | 1.24 | 1.09, 1.41 |
| <i>2019 FEMALE</i>                                                             | 56,056       | 24,414 | 43.5 | 1.05         | 1.02, 1.09 | 2759              | 4.9  | 1.46 | 1.31, 1.62 |
| <i>2017 MALE</i>                                                               | 47,218       | 31,785 | 67.3 | 1            |            | 4620              | 9.8  | 1    |            |
| <i>2018 MALE</i>                                                               | 31,802       | 21,097 | 66.3 | 0.98         | 0.94, 1.01 | 3554              | 11.2 | 1.10 | 1.01, 1.20 |
| <i>2019 MALE</i>                                                               | 54,020       | 35,491 | 65.7 | 0.96         | 0.95, 0.98 | 6190              | 11.5 | 1.12 | 1.05, 1.19 |
| <b>ASSOCIATION BETWEEN GENDER AND ED PER YEAR (FEMALES IN REFERENCE GROUP)</b> |              |        |      |              |            |                   |      |      |            |

|    |                             |        |        |      |      |            |      |      |                 |
|----|-----------------------------|--------|--------|------|------|------------|------|------|-----------------|
| 1  |                             |        |        |      |      |            |      |      |                 |
| 2  |                             |        |        |      |      |            |      |      |                 |
| 3  | <i>MALE 2017</i>            |        |        |      | 1.64 | 1.57, 1.71 |      | 2.79 | 2.58, 3.03      |
| 4  |                             |        |        |      |      |            |      |      |                 |
| 5  | <i>MALE 2018</i>            |        |        |      | 1.62 | 1.48, 1.78 |      | 2.48 | 2.24, 2.75      |
| 6  |                             |        |        |      |      |            |      |      |                 |
| 7  | <i>MALE 2019</i>            |        |        |      | 1.49 | 1.43, 1.56 |      | 2.14 | 2.01, 2.29      |
| 8  |                             |        |        |      |      |            |      |      |                 |
| 9  | <b>GRADE</b>                |        |        |      |      |            |      |      |                 |
| 10 |                             |        |        |      |      |            |      |      |                 |
| 11 | 8                           | 52,984 | 22,741 | 42.9 | 1    |            | 2533 | 4.8  | 1               |
| 12 |                             |        |        |      |      |            |      |      |                 |
| 13 | 9                           | 51,393 | 26,914 | 52.4 | 1.20 | 1.18, 1.22 | 3224 | 6.3  | 1.25 1.17, 1.33 |
| 14 |                             |        |        |      |      |            |      |      |                 |
| 15 | 10                          | 50,547 | 28,215 | 55.8 | 1.26 | 1.24, 1.29 | 3654 | 7.2  | 1.39 1.30, 1.49 |
| 16 |                             |        |        |      |      |            |      |      |                 |
| 17 | 11                          | 50,972 | 30,154 | 59.2 | 1.34 | 1.30, 1.38 | 4756 | 9.3  | 1.79 1.64, 1.95 |
| 18 |                             |        |        |      |      |            |      |      |                 |
| 19 | 12                          | 40,391 | 23,925 | 59.2 | 1.34 | 1.30, 1.39 | 3886 | 9.6  | 1.85 1.67, 2.04 |
| 20 |                             |        |        |      |      |            |      |      |                 |
| 21 | 13                          | 26,351 | 14,864 | 56.4 | 1.32 | 1.27, 1.38 | 2154 | 8.2  | 1.74 1.56, 1.94 |
| 22 |                             |        |        |      |      |            |      |      |                 |
| 23 | <b>RESIDENCY</b>            |        |        |      |      |            |      |      |                 |
| 24 |                             |        |        |      |      |            |      |      |                 |
| 25 | 1                           | 56,012 | 26,965 | 48.1 | 1    |            | 3254 | 5.8  | 1               |
| 26 |                             |        |        |      |      |            |      |      |                 |
| 27 | 2                           | 63,413 | 32,609 | 51.4 | 1.06 | 1.03, 1.10 | 4355 | 6.9  | 1.20 1.04, 1.37 |
| 28 |                             |        |        |      |      |            |      |      |                 |
| 29 | 3                           | 74,853 | 40,723 | 54.4 | 1.11 | 1.09, 1.13 | 5738 | 7.7  | 1.27 1.11, 1.46 |
| 30 |                             |        |        |      |      |            |      |      |                 |
| 31 | 4                           | 46,826 | 27,433 | 58.6 | 1.20 | 1.16, 1.23 | 4077 | 8.7  | 1.46 1.28, 1.66 |
| 32 |                             |        |        |      |      |            |      |      |                 |
| 33 | 5                           | 27,900 | 16,895 | 60.6 | 1.25 | 1.21, 1.29 | 2467 | 8.8  | 1.54 1.34, 1.77 |
| 34 |                             |        |        |      |      |            |      |      |                 |
| 35 | 6                           | 8847   | 5329   | 60.2 | 1.24 | 1.17, 1.30 | 750  | 8.5  | 1.58 1.34, 1.86 |
| 36 |                             |        |        |      |      |            |      |      |                 |
| 37 | <b>SOCIOECONOMIC STATUS</b> |        |        |      |      |            |      |      |                 |
| 38 |                             |        |        |      |      |            |      |      |                 |
| 39 | 5 HIGHEST                   | 56,418 | 28,084 | 49.8 | 1    |            | 3133 | 5.6  | 1               |
| 40 |                             |        |        |      |      |            |      |      |                 |
| 41 |                             |        |        |      |      |            |      |      |                 |
| 42 |                             |        |        |      |      |            |      |      |                 |
| 43 |                             |        |        |      |      |            |      |      |                 |
| 44 |                             |        |        |      |      |            |      |      |                 |
| 45 |                             |        |        |      |      |            |      |      |                 |
| 46 |                             |        |        |      |      |            |      |      |                 |



|                            |        |        |      |      |            |      |      |      |            |
|----------------------------|--------|--------|------|------|------------|------|------|------|------------|
| 4                          | 55,641 | 29,692 | 53.4 | 1.04 | 1.03, 1.05 | 3665 | 6.6  | 1.09 | 1.05, 1.14 |
| 3                          | 55,935 | 30,532 | 54.6 | 1.06 | 1.05, 1.07 | 4199 | 7.5  | 1.22 | 1.17, 1.28 |
| 2                          | 55,947 | 31,269 | 55.9 | 1.07 | 1.06, 1.08 | 4542 | 8.1  | 1.28 | 1.22, 1.35 |
| 1 LOWEST                   | 54,950 | 30,949 | 56.3 | 1.08 | 1.07, 1.10 | 5160 | 9.4  | 1.46 | 1.39, 1.53 |
| <b>PHYSICAL ACTIVITY</b>   |        |        |      |      |            |      |      |      |            |
| NEVER                      | 4518   | 2481   | 54.9 | 1    |            | 782  | 17.3 | 1    |            |
| SELDOM                     | 19,642 | 11,086 | 56.4 | 1.05 | 1.01, 1.08 | 2002 | 10.2 | 0.65 | 0.58, 0.72 |
| 1-2 TIMES A MONTH          | 18,007 | 9903   | 55.0 | 1.04 | 1.01, 1.07 | 1357 | 7.5  | 0.53 | 0.48, 0.58 |
| 1-2 TIMES A WEEK           | 75,687 | 40,581 | 53.6 | 1.02 | 0.98, 1.05 | 5058 | 6.7  | 0.50 | 0.45, 0.55 |
| 3-4 TIMES A WEEK           | 89,537 | 47,874 | 53.5 | 1.03 | 1.00, 1.06 | 5614 | 6.3  | 0.52 | 0.47, 0.57 |
| ≥ 5 TIMES A WEEK           | 65,897 | 35,312 | 53.6 | 1.01 | 0.98, 1.05 | 5173 | 7.9  | 0.62 | 0.57, 0.68 |
| <b>LEISURE SCREEN TIME</b> |        |        |      |      |            |      |      |      |            |
| ≤ 2 HOURS DAILY            | 43,234 | 18,797 | 43.5 | 1    |            | 1978 | 4.6  | 1    |            |
| 2-3 HOURS DAILY            | 60,567 | 28,922 | 47.8 | 1.10 | 1.09, 1.11 | 2659 | 4.4  | 1.00 | 0.95, 1.06 |
| 3-4 HOURS DAILY            | 75,781 | 40,778 | 53.8 | 1.22 | 1.20, 1.24 | 4514 | 6.0  | 1.33 | 1.26, 1.40 |
| 4-6 HOURS DAILY            | 59,250 | 35,462 | 59.9 | 1.32 | 1.30, 1.34 | 4950 | 8.4  | 1.79 | 1.70, 1.88 |
| ≥ 6 HOURS DAILY            | 36,168 | 24,214 | 66.9 | 1.42 | 1.40, 1.45 | 6026 | 16.7 | 3.15 | 3.00, 3.32 |

ED: Energy drink; RR: Relative Risk; CI: Confidence Interval; <sup>a</sup> Modified Poisson regression with robust variance estimation; <sup>b</sup> Estimates are statistically significant if their CIs do not include 1.0. Total sample n= 256,801. Walds test shows statistically significant p-values at p<0.05. Loglikelihood ratio test of complete interaction term was significant at p<0.01.

1  
2  
3 The association between ED consumption and social determinants (Table 2) showed that the  
4 largest proportion of high ED consumers was found in participants living in centrality index 6  
5 (least central residency). Furthermore, we found a larger proportion of high ED consumers  
6 with decreasing SES. The same association was found when looking at the any ED  
7 consumption group, although differences were less pronounced. There was a relationship  
8 between high ED consumption and physical activity. Here, the lowest proportion was  
9 observed for those who were physically active 1-2 times a week compared to those who  
10 were never being physically active. However, this was not observed for the any ED  
11 consumption group. Regarding both the participants who consumed any ED as well as the  
12 high consumers, the proportions increased with increasing leisure screen time. The  
13 proportion of high ED consumers that spent more than 6 hours looking at a screen outside  
14 school hours was three times higher than the high ED consumers that spent less than 2  
15 hours looking at a screen.  
16  
17  
18  
19  
20  
21  
22  
23  
24  
25  
26  
27  
28  
29  
30  
31  
32  
33  
34  
35  
36  
37  
38  
39  
40  
41  
42  
43  
44  
45  
46  
47  
48  
49  
50  
51  
52  
53  
54  
55  
56  
57  
58  
59  
60

## DISCUSSION

We have described social determinants and changes in ED consumption among Norwegian adolescents between 2017 and 2019. We found an increase in the percentage of both boys and girls being high ED consumers and a change in ED consumption according to time. The main finding was an increasing proportion of female high ED consumers, which is of special interest as it highlights the fact that despite male high ED consumers still being the gender consuming most ED, females high ED consumers are catching up.

We found that in total, over the three years, 4.2% of the girls and 10.8% of the boys were high ED consumers. There was an annual increase in the proportion of high consumers that was most pronounced for girls increasing from 3.3% in 2017 to 4.9% in 2019. Moreover, we found that more than half of the adolescents participating in the study had consumed any ED during these three years. The increase in high ED consumption was expected as sales in ED in Norway have increased. However, adolescents are most likely not the only group consuming increasing amounts of ED. It is plausible that other groups in the population follow the same trend in ED consumption.

High ED consumption was positively associated with the male gender, lower SES, attending schools located in rural areas, excessive screen watching, but not with physical activity at any level. The combination of either low or high physical activity and high leisure screen-time as predictors for ED consumption was also found in other studies from Saudi Arabia, Canada, and the U.S.(3, 18, 33-35) Al-Hazza et. al proposed that the reason why both low and high physical activity and high leisure screen-time was observed, is due to how ED are being marketed.(33)

1  
2  
3 According to the study by Emond et. al on ED advertisement, ED was primarily advertised on  
4 channels with adolescents as their base audience.(5) Based on this, one could imagine that  
5 increased screen time and thereby increased exposure to ED advertising would lead to  
6 higher ED consumption rates.(7) In addition, Hammond et. al. found that TV was the main  
7 common source of marketing of ED to adolescents next to marketing in grocery stores.(36)  
8  
9 Our results also suggest that adolescents who spend much of their spare time watching  
10 screens are those who consume most ED. Regarding the gender difference in high ED  
11 consumption, one could hypothesize that the marketing of ED appeals more to boys as they  
12 are the ones consuming more ED.  
13  
14

15  
16 Our results show that even though boys still are the highest consumers of ED, the increase in  
17 the proportion of female high consumers was larger, on a multiplicative scale but not an  
18 additive scale, compared to males over the three years. The increase was 1.7 percentage  
19 points for boys (9.8-11.5%) and 1.6 for girls (3.3-4.9%) from 2017 until 2019. Based on this  
20 finding it could be speculated that girls are becoming more exposed and perhaps more  
21 susceptible to ED marketing than before.  
22  
23  
24  
25  
26  
27  
28  
29  
30  
31  
32  
33  
34  
35  
36  
37  
38  
39  
40

### 41 **Limitations and strengths**

42  
43 A limitation of the study is that we were not able to take the regional differences in  
44 participation of schools each year into account. This might have affected the observed  
45 development of ED consumption seen over the three years. However, the breadth of the  
46 municipalities participating in the Ungdata study in 2017, 2018 and 2019 with an even  
47 distribution of smaller and larger communities spread out across Norway makes the sample  
48 sufficiently large and wide-reaching. Moreover, the participants are not completely selected  
49 at random as only municipalities who wanted to participate in the Ungdata survey were  
50  
51  
52  
53  
54  
55  
56  
57  
58  
59  
60

1  
2  
3 included in the study. In addition, the participating schools within these municipalities were  
4  
5 not selected completely at random. The lower secondary schools are run by the  
6  
7 municipalities while the upper secondary schools are organized according to regional  
8  
9 districts, therefore the schools have different catchment areas when it comes to children  
10  
11 attending the schools.  
12  
13

14  
15  
16 Other limitations common to such surveys are that the study relies on self-reported ED  
17  
18 consumption which can be susceptible to both recall bias and social desirability bias.(37)  
19  
20 Moreover, only children who attended school on the day of the survey answered the  
21  
22 questionnaire. Adolescents who were absent or had dropped out were therefore not  
23  
24 included in the study, which might have affected the results. Finally, some adolescents might  
25  
26 have participated more than once, yet no adjustment for lack of independence between  
27  
28 these observations was possible.  
29  
30  
31

32  
33  
34 The major strength of this study is the large sample included, with close to 300,000  
35  
36 adolescents answering the questionnaire and a response from 74.4% of the total eligible  
37  
38 students in this time period.  
39  
40

## 41 **CONCLUSION**

42  
43  
44 ED consumption is increasing among female adolescents, especially high ED consumption.  
45  
46 This is an important finding to consider in future research which could focus on possible  
47  
48 gender-related differences when studying various aspects of ED consumption. In addition,  
49  
50 with rising ED consumption it is increasingly important to investigate the potential long-term  
51  
52 effects of ED use among adolescents.  
53  
54  
55  
56  
57  
58  
59  
60

**REFERENCES**

1. Drikkeglede.no. Salgstall Energidrikker [updated 13-05-2020. Available from: [https://www.drikkeglede.no/tall\\_og\\_fakta/?PT\\_Radnr=5&mnd=3&aar=2020](https://www.drikkeglede.no/tall_og_fakta/?PT_Radnr=5&mnd=3&aar=2020).
2. Zucconi S., Volpato C., Adinolfi F., et al. Gathering consumption data on specific consumer groups of energy drinks. 2013;EN-394:190.
3. Visram S, Cheetham M, Riby DM, et al. Consumption of energy drinks by children and young people: a rapid review examining evidence of physical effects and consumer attitudes. BMJ Open. 2016;6(10):e010380.
4. VKM, Bruzell E, Carlsen MH, et al. Risk assessment of energy drinks and caffeine. Scientific opinion of the Panel of Food Additives, Flavourings, Processing Aids, Materials in Contact with Food, and Cosmetics of the Norwegian Scientific Committee for Food and Environment., Norwegian Scientific Committee for Food and Environment (VKM); 2019. Report No.: 01.
5. Emond JA, Sargent JD, Gilbert-Diamond D. Patterns of energy drink advertising over US television networks. Journal of nutrition education and behavior. 2015;47(2):120-6.e1.
6. Stacey N, van Walbeek C, Maboshe M, et al. Energy drink consumption and marketing in South Africa. Preventive medicine. 2017;105s:S32-s6.
7. Wiggers D, Asbridge M, Baskerville NB, et al. Exposure to Caffeinated Energy Drink Marketing and Educational Messages among Youth and Young Adults in Canada. International journal of environmental research and public health. 2019;16(4).
8. Grasser EK, Yepuri G, Dulloo AG, et al. Cardio- and cerebrovascular responses to the energy drink Red Bull in young adults: a randomized cross-over study. European journal of nutrition. 2014;53(7):1561-71.

- 1  
2  
3 9. Dawodu A, Cleaver K. Behavioural correlates of energy drink consumption among  
4 adolescents: A review of the literature. *Journal of Child Health Care*. 2017;21(4):446-62.  
5  
6  
7
- 8 10. Brand S, Kirov R. Sleep and its importance in adolescence and in common adolescent  
9 somatic and psychiatric conditions. *International journal of general medicine*. 2011;4:425-42.  
10  
11  
12
- 13 11. Kronholm E, Puusniekka R, Jokela J, et al. Trends in self-reported sleep problems,  
14 tiredness and related school performance among Finnish adolescents from 1984 to 2011.  
15 *Journal of sleep research*. 2015;24(1):3-10.  
16  
17  
18
- 19 12. Harris JL, Munsell CR. Energy drinks and adolescents: what's the harm? *Nutr Rev*.  
20 2015;73(4):247-57.  
21  
22  
23
- 24 13. Iversen KL, Arnesen E, Meltzer HM, et al. Children and adolescents need protection  
25 against energy drinks. *Tidsskrift for den Norske lægeforening : tidsskrift for praktisk medicin,*  
26 *ny række*. 2018;138(14).  
27  
28  
29
- 30 14. Keast RS, Swinburn BA, Sayompark D, et al. Caffeine increases sugar-sweetened  
31 beverage consumption in a free-living population: a randomised controlled trial. *The British*  
32 *journal of nutrition*. 2015;113(2):366-71.  
33  
34  
35  
36  
37  
38
- 39 15. Temple JL, Dewey AM, Briatico LN. Effects of acute caffeine administration on  
40 adolescents. *Experimental and clinical psychopharmacology*. 2010;18(6):510-20.  
41  
42  
43
- 44 16. Breda JJ, Whiting SH, Encarnacao R, et al. Energy drink consumption in europe: a  
45 review of the risks, adverse health effects, and policy options to respond. *Frontiers in public*  
46 *health*. 2014;2:134.  
47  
48  
49
- 50 17. Mattilsynet. Energidrikker og koffein. Mattilsynets anbefaling til Helse- og  
51 omsorgsdepartementet. 2019.  
52  
53  
54  
55  
56  
57  
58  
59  
60

- 1  
2  
3 18. Azagba S, Langille D, Asbridge M. An emerging adolescent health risk: caffeinated  
4 energy drink consumption patterns among high school students. Preventive medicine.  
5 2014;62:54-9.  
6  
7  
8  
9
- 10 19. Sampasa-Kanyinga H, Masengo L, Hamilton H, et al. Energy Drink Consumption and  
11 Substance Use among Middle and High School Students. International journal of  
12 environmental research and public health. 2020;17(9).  
13  
14  
15  
16
- 17 20. Degirmenci N, Fossum IN, Strand TA, et al. Consumption of energy drinks among  
18 adolescents in Norway: a cross-sectional study. BMC public health. 2018;18(1):1391.  
19  
20  
21  
22
- 23 21. Committee on Nutrition and the Council on Sports Medicine and Fitness. Sports  
24 drinks and energy drinks for children and adolescents: are they appropriate? Pediatrics.  
25 2011;127(6):1182-9.  
26  
27  
28
- 29 22. Ungdata. About Ungdata 2020 [Available from: <https://www.ungdata.no/english/>.  
30  
31  
32
- 33 23. Keute A-L, Bratholmen NVL. Upper secondary education (Videregående opplæring og  
34 annen videregående utdanning) 2020 [updated 27-02-2020. Available from:  
35 <https://www.ssb.no/vgu>.  
36  
37  
38
- 39 24. Bakken A. Ungdata. Nasjonale resultater 2019.: NOVA, OsloMet; 2019. Report No.:  
40 NOVA Rapport 9/19, .  
41  
42  
43
- 44 25. Frøyland L R. Ungdata - Lokale ungdomsundersøkelser. Dokumentasjon av variablene  
45 i spørreskjemaet. . NOVA; 2017.  
46  
47  
48  
49
- 50 26. Bloch VVH. Classification of centrality 2020 [Available from:  
51 <https://www.ssb.no/en/klass/klassifikasjoner/128/versjon/1292/om>.  
52  
53  
54
- 55 27. Zou G. A modified poisson regression approach to prospective studies with binary  
56 data. American journal of epidemiology. 2004;159(7):702-6.  
57  
58  
59  
60



- 1  
2  
3 28. Knol MJ, Le Cessie S, Algra A, et al. Overestimation of risk ratios by odds ratios in  
4 trials and cohort studies: alternatives to logistic regression. *CMAJ : Canadian Medical*  
5 *Association journal = journal de l'Association medicale canadienne.* 2012;184(8):895-9.  
6  
7  
8  
9  
10 29. Rojanaworarit C, Wong JJ. Investigating the Source of a Disease Outbreak Based on  
11 Risk Estimation: A Simulation Study Comparing Risk Estimates Obtained From Logistic and  
12 Poisson Regression Applied to a Dichotomous Outcome. *The Ochsner journal.*  
13 2019;19(3):220-6.  
14  
15  
16  
17  
18 30. Richardson DB, Kaufman JS. Estimation of the relative excess risk due to interaction  
19 and associated confidence bounds. *American journal of epidemiology.* 2009;169(6):756-60.  
20  
21  
22  
23  
24 31. StataCorp. *Stata Statistical Software: Release 15.* College Station, TX: StataCorp LLC;  
25 2017.  
26  
27  
28  
29 32. Høydahl E. *Ny sentralitetsindes for kommunene - New centrality index for the*  
30 *municipalities.* Statistics Norway; 2017.  
31  
32  
33  
34 33. Al-Hazaa HM, Al-Sobayel HI, Abahussain NA, et al. Association of dietary habits with  
35 levels of physical activity and screen time among adolescents living in Saudi Arabia. *Journal*  
36 *of Human Nutrition & Dietetics.* 2014;27 Suppl 2:204-13.  
37  
38  
39  
40  
41 34. Larson N, DeWolfe J, Story M, et al. Adolescent Consumption of Sports and Energy  
42 Drinks: Linkages to Higher Physical Activity, Unhealthy Beverage Patterns, Cigarette Smoking,  
43 and Screen Media Use. *Journal of Nutrition Education & Behavior.* 2014;46(3):181-7.  
44  
45  
46  
47  
48 35. Nowak D, Jasionowski A. Analysis of the Consumption of Caffeinated Energy Drinks  
49 among Polish Adolescents. *International Journal of Environmental Research & Public Health*  
50 *[Electronic Resource].* 2015;12(7):7910-21.  
51  
52  
53  
54  
55 36. Hammond D, Reid JL. Exposure and perceptions of marketing for caffeinated energy  
56 drinks among young Canadians. *Public health nutrition.* 2018;21(3):535-42.  
57  
58  
59  
60

1  
2  
3 37. Rothman K. J. Epidemiology: An Introduction. 2nd ed. New York: Oxford University  
4 Press; 2002.  
5  
6  
7  
8  
9  
10  
11  
12  
13  
14  
15  
16  
17  
18  
19  
20  
21  
22  
23  
24  
25  
26  
27  
28  
29  
30  
31  
32  
33  
34  
35  
36  
37  
38  
39  
40  
41  
42  
43  
44  
45  
46  
47  
48  
49  
50  
51  
52  
53  
54  
55  
56  
57  
58  
59  
60

For peer review only

1  
2  
3 **Footnote page**  
4  
5

6 **Abbreviations**  
7  
8

9 ED = Energy Drinks  
10

11  
12 EFSA = European Food Safety Authority  
13

14  
15 FAS II = Family Affluence Scale II  
16

17  
18 NFSA = Norwegian Ministry of Health, the Norwegian Food Safety Authority  
19

20  
21 RR = Relative Risk  
22

23  
24 SES = Socio-Economic Status  
25

26  
27 VKM = Norwegian Scientific Committee for Food and Environment  
28  
29

30  
31 **Acknowledgements:** The authors would like to thank NOVA (The Norwegian Social Research)  
32  
33 for granting access to the data from the «Ungdata, 2010-2019» surveys used in the present  
34  
35 study.  
36  
37

38  
39 **Contributors:** S.K. and M. H.-A., conceptualized the study, acquired the data and drafted the  
40  
41 manuscript; S.K., T. A. S., and M. H.-A., analyzed the data; All authors (S.K, M. H.-A., T. A. S.,  
42  
43 and B. S. S) contributed to writing the manuscript; All authors have read and approved the  
44  
45 final manuscript.  
46  
47

48  
49 **Funding:** The study was funded by Innlandet Hospital Trust (project number: 150377).  
50  
51

52  
53 **Ethical approval:** The annual Ungdata Survey is approved by the Norwegian Centre for  
54  
55 Research Data (NSD). Participants do not have unique identification numbers as data  
56  
57 collection is done anonymously and does not contain sensitive information. Therefore, no  
58  
59 ethical approval was needed.  
60

1  
2  
3 **Patient and public involvement:** There was no patient or public involvement in study.  
4  
5

6 **Data availability statement:** The data supporting our study is available from the Norwegian  
7  
8 Centre for Research Data (NSD) and were used under license for the current study. The  
9  
10 Ungdata survey is funded by The Norwegian Directorate of Health. Anonymous data has  
11  
12 been made available for the authors by NOVA through NSD – the Norwegian Center for  
13  
14 Research Data. Neither NOVA, The Norwegian Directorate of Health or NSD are responsible  
15  
16 for the analyses or interpretation of the presented data.  
17  
18  
19

20  
21 **Competing interest:** None declared  
22  
23

## 24 **Figures**

25  
26  
27 **Figure 1:** Overview of the Study Participants.  
28  
29

30  
31 **Figure 2:** Any ED Consumers per Year and Gender.  
32  
33

34 **Figure 3:** High ED Consumers per Year and Gender.  
35  
36  
37  
38  
39  
40  
41  
42  
43  
44  
45  
46  
47  
48  
49  
50  
51  
52  
53  
54  
55  
56  
57  
58  
59  
60



1  
2  
3  
4  
5  
6  
7  
8  
9  
10  
11  
12  
13  
14  
15  
16  
17  
18  
19  
20  
21  
22  
23  
24  
25  
26  
27  
28  
29  
30  
31  
32  
33  
34  
35  
36  
37  
38  
39  
40  
41  
42  
43  
44  
45  
46  
47  
48  
49  
50  
51  
52  
53  
54  
55  
56  
57  
58  
59  
60

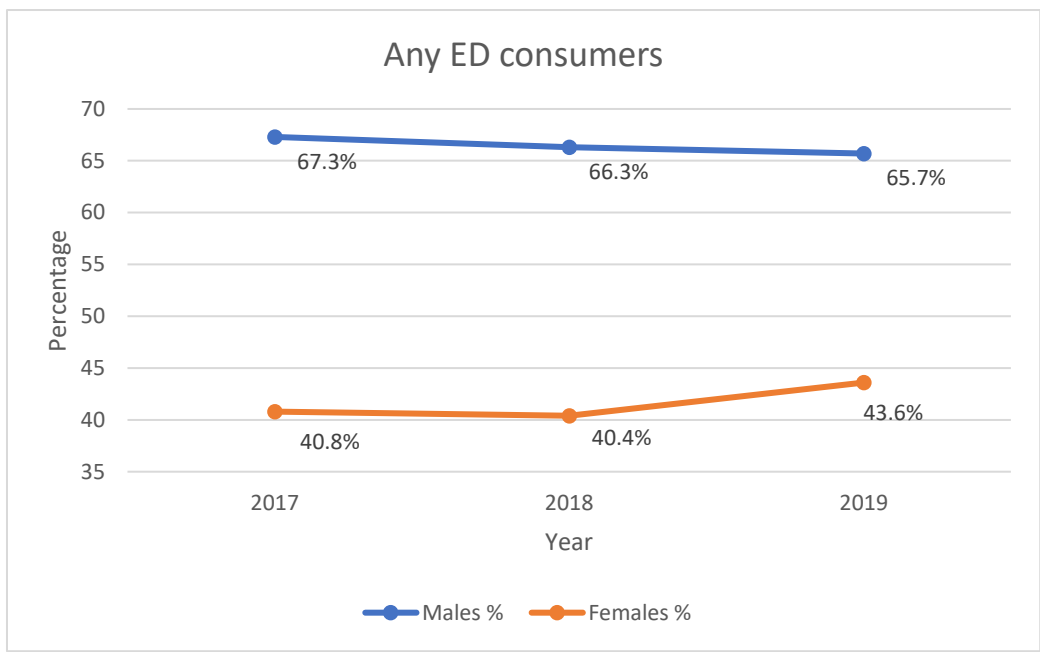

peer review only

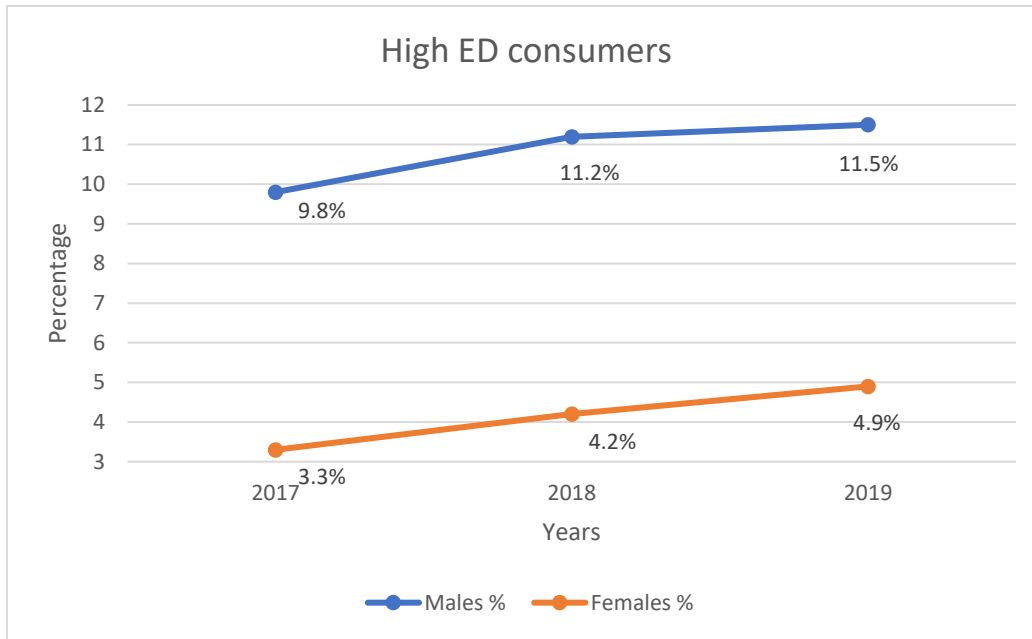

peer review only

1  
2  
3  
4  
5  
6  
7  
8  
9  
10  
11  
12  
13  
14  
15  
16  
17  
18  
19  
20  
21  
22  
23  
24  
25  
26  
27  
28  
29  
30  
31  
32  
33  
34  
35  
36  
37  
38  
39  
40  
41  
42  
43  
44  
45  
46  
47  
48  
49  
50  
51  
52  
53  
54  
55  
56  
57  
58  
59  
60STROBE Statement—Checklist of items that should be included in reports of *cross-sectional studies*

|                              | Item No | Recommendation                                                                                                                                                                                               | Page No |
|------------------------------|---------|--------------------------------------------------------------------------------------------------------------------------------------------------------------------------------------------------------------|---------|
| <b>Title and abstract</b>    | 1       | (a) Indicate the study's design with a commonly used term in the title or the abstract                                                                                                                       | 0       |
|                              |         | (b) Provide in the abstract an informative and balanced summary of what was done and what was found                                                                                                          | 0       |
| <b>Introduction</b>          |         |                                                                                                                                                                                                              |         |
| Background/rationale         | 2       | Explain the scientific background and rationale for the investigation being reported                                                                                                                         | 1-3     |
| Objectives                   | 3       | State specific objectives, including any prespecified hypotheses                                                                                                                                             | 3       |
| <b>Methods</b>               |         |                                                                                                                                                                                                              |         |
| Study design                 | 4       | Present key elements of study design early in the paper                                                                                                                                                      | 0+4     |
| Setting                      | 5       | Describe the setting, locations, and relevant dates, including periods of recruitment, exposure, follow-up, and data collection                                                                              | 0+4     |
| Participants                 | 6       | (a) Give the eligibility criteria, and the sources and methods of selection of participants                                                                                                                  | 5       |
| Variables                    | 7       | Clearly define all outcomes, exposures, predictors, potential confounders, and effect modifiers. Give diagnostic criteria, if applicable                                                                     | 5-7     |
| Data sources/<br>measurement | 8*      | For each variable of interest, give sources of data and details of methods of assessment (measurement). Describe comparability of assessment methods if there is more than one group                         | 5-7     |
| Bias                         | 9       | Describe any efforts to address potential sources of bias                                                                                                                                                    | 5       |
| Study size                   | 10      | Explain how the study size was arrived at                                                                                                                                                                    | 5       |
| Quantitative variables       | 11      | Explain how quantitative variables were handled in the analyses. If applicable, describe which groupings were chosen and why                                                                                 | 5-7     |
| Statistical methods          | 12      | (a) Describe all statistical methods, including those used to control for confounding                                                                                                                        | 7       |
|                              |         | (b) Describe any methods used to examine subgroups and interactions                                                                                                                                          | 7       |
|                              |         | (c) Explain how missing data were addressed                                                                                                                                                                  | 5       |
|                              |         | (d) If applicable, describe analytical methods taking account of sampling strategy                                                                                                                           | NA      |
|                              |         | (e) Describe any sensitivity analyses                                                                                                                                                                        | 7       |
| <b>Results</b>               |         |                                                                                                                                                                                                              |         |
| Participants                 | 13*     | (a) Report numbers of individuals at each stage of study—eg numbers potentially eligible, examined for eligibility, confirmed eligible, included in the study, completing follow-up, and analysed            | 9       |
|                              |         | (b) Give reasons for non-participation at each stage                                                                                                                                                         | 5       |
|                              |         | (c) Consider use of a flow diagram                                                                                                                                                                           | 5       |
| Descriptive data             | 14*     | (a) Give characteristics of study participants (eg demographic, clinical, social) and information on exposures and potential confounders                                                                     | 9       |
|                              |         | (b) Indicate number of participants with missing data for each variable of interest                                                                                                                          | 9       |
| Outcome data                 | 15*     | Report numbers of outcome events or summary measures                                                                                                                                                         | 9-10    |
| Main results                 | 16      | (a) Give unadjusted estimates and, if applicable, confounder-adjusted estimates and their precision (eg, 95% confidence interval). Make clear which confounders were adjusted for and why they were included | 10-15   |



|                          |    |                                                                                                                                                                            |       |
|--------------------------|----|----------------------------------------------------------------------------------------------------------------------------------------------------------------------------|-------|
|                          |    | (b) Report category boundaries when continuous variables were categorized                                                                                                  | 10-15 |
|                          |    | (c) If relevant, consider translating estimates of relative risk into absolute risk for a meaningful time period                                                           |       |
| Other analyses           | 17 | Report other analyses done—eg analyses of subgroups and interactions, and sensitivity analyses                                                                             | 11-12 |
| <b>Discussion</b>        |    |                                                                                                                                                                            |       |
| Key results              | 18 | Summarise key results with reference to study objectives                                                                                                                   | 17    |
| Limitations              | 19 | Discuss limitations of the study, taking into account sources of potential bias or imprecision. Discuss both direction and magnitude of any potential bias                 | 18-19 |
| Interpretation           | 20 | Give a cautious overall interpretation of results considering objectives, limitations, multiplicity of analyses, results from similar studies, and other relevant evidence | 17-19 |
| Generalisability         | 21 | Discuss the generalisability (external validity) of the study results                                                                                                      | 18-19 |
| <b>Other information</b> |    |                                                                                                                                                                            |       |
| Funding                  | 22 | Give the source of funding and the role of the funders for the present study and, if applicable, for the original study on which the present article is based              | 4-5   |

\*Give information separately for exposed and unexposed groups.

**Note:** An Explanation and Elaboration article discusses each checklist item and gives methodological background and published examples of transparent reporting. The STROBE checklist is best used in conjunction with this article (freely available on the Web sites of PLoS Medicine at <http://www.plosmedicine.org/>, Annals of Internal Medicine at <http://www.annals.org/>, and Epidemiology at <http://www.epidem.com/>). Information on the STROBE Initiative is available at [www.strobe-statement.org](http://www.strobe-statement.org).
